# Supplementary material for: Genomic Diversification in Strains of Rickettsia felis Isolated from Different Arthropods
Source: PubMed Central journal article supplement (PMC4316617; doi:10.1093/gbe/evu262), 2014-12-04
Supplement: supp_evu262_Supp_Mat_Figs_1-9.pdf [file supp_evu262_Supp_Mat_Figs_1-9.pdf]

**Supplementary fig. S1.** Characteristics of the *Wolbachia* 16S rRNA gene concurrently sequenced and assembled with *R. felis* str. LSU.

(A) Assembled sequence of the 16S rRNA gene of the *Wolbachia* species concurrently sequenced with *Rickettsia felis* str. LSU. Two divergent *Wolbachia* species are known to exist in the LSU *C. felis* colony (Pornwiroon, et al. 2007), an uncharacterized species and a species closely related to *Wolbachia* spp. previously detected in fleas (Gorham, et al. 2003). The sequence assembled here is identical to the 16S rDNA of the uncharacterized *Wolbachia* species (EF121347) previously reported from the LSU cat flea colony.

(B) Alignment showing the identical match of the assembled *Wolbachia* 16S rDNA to the uncharacterized *Wolbachia* species previously reported from the LSU cat flea colony. Alignment was performed using MUSCLE v3.6 (default parameters) (Edgar 2004). Asterisks denote identical nucleotides.

## Literature Cited

Edgar RC 2004. MUSCLE: multiple sequence alignment with high accuracy and high throughput. *Nucleic Acids Res* 32: 1792-1797. doi: 10.1093/nar/gkh340  
32/5/1792 [pii]

Gorham CH, Fang QQ, Durden LA 2003. *Wolbachia* endosymbionts in fleas (Siphonaptera). *The Journal of parasitology* 89: 283-289. doi: 10.1645/0022-3395(2003)089[0283:WEIFS]2.0.CO;2

Pornwiroon W, Kearney MT, Husseneder C, Foil LD, Macaluso KR 2007. Comparative microbiota of *Rickettsia felis*-uninfected and -infected colonized cat fleas, *Ctenocephalides felis*. *The ISME journal* 1: 394-402. doi: 10.1038/ismej.2007.38

A

>wLSU 16S SSU rDNA, full-length

TTTTTCATAGTAATATCCCTAAGTAGATGTATATTTTATATATTAATGCTTTTGTATTGCAAAAACATATGACACTGTGATTATATACATAAATAATTTTTTAAAGTTGTTGAATAGTTGAAGATTAAAAATA
TTTCTAGAGTAGAAAATAAGGCGCAGCAGTATAAAGCTAAATTTATTTTATCGGATTTATCCGATGTACCCTCAACCTTTGATAGGTTGAAGTCTAAATTTGAGAGTTTGTACTCTGGCTCAGAATGAACCGTGGCGG
CAGGCCTAACACATGCAAGTCGACGAGGTTATATTGTAGCTTGCATAGTATACTAGTGGCAGACGGGTGAGTAATGTATAGGAATCTACCTAGTAGTACGGGCAATTTGCTGGAACCGCAACTAATACCGT
ATACGCCCTACGGGGAAAAGATTATTTGCTATTAGATGAGCCTATATTAGATTAGTTAGTTGGTGGGGTAATGGCCACCAAGGCAATGATCTATAGCTGATCTGAGAGGATGATCAGCCACACTGGAAGTGAAGT
ACGGTCCAGACTCTACGGGAGGCGAGCAGTGGGGAATTTGGACAATGGGCGAAAGCCTGATCCAGCCATGCCCATGAGTGAAGAAGGCCCTTTGGGTGTAAGGCTTTTTCAGTGAAGGAAGATAATGACGGTACT
CACAGAAGAAGTCTTGCTAACTCCGTCCGACGAGCCGGTAAATCCGGAGAGGCTAGCGTTATTCGGAAATTTATGGCGTAAAGGGCGCGTAGGCTGATTAGTAAGTTAAAAGTGAATCCCAAAGCTTAACTT
TGGAAATGCTTTAAAAGTCTAATCTAGAGATTGAAAGAGGATAGAGGAATTCCTAGTGTAGAGGTGAAATTCGTAATAATATAGGAGGAACACCCAGTGGCGAAGGCGCTATCTGGTTCAAATCTGACGCTGAGG
CGCGAAGGCGTGGGGACAAACAGGATTAGTACCCTGGTACCTCCAGCTGAAACAGTGAATGTTAAATATGGGGAGTTACTTTCTGTATTACAGCTAACCGCTTAAACATCCCGCTGGGGAATCAGGTCGCCA
AGATTAAAACCTCAAAGGAATTGACGGGACCCGCACAAGCGTGGAGCATGTGGTTTAAATTCGATGCAACGCAAAAACCTTACCACCTCTGACATGGAATTTATACCTATCCGAAGGGATGGGTTCGGTTCGGC
CGGATTTACACAGGTTTGCATGGCTGTCTGAGTGTGGTAAAGTCCCGCAACGAGCGCAACCCCTATCTCTAGTTACCATCAGGTAATGCTGGGAACCTTAAAGGAACTGCCAGTGTAT
AACTGGAGGAAGTGGGGATGATGTCAGTCAAGTCAATGGCCCTTATGGAGTGGGCTACACACGTCTACAATGGTGGTACAATGGGCTGCAAAAGTCCGAGGCTAAGCTAATCCCTTAAAAGCCATCTCAGTTCG
GATTTACTCTGCAACTCAGTGCATGAAGTTGGAATCCGTAGTAACTCGTGGATCAGCATGCCAGGTAATACGTTCTCGGGTCTTGTACACACTGCCCGTACGCGCATGGGAATTTGGTTCACTCGAAGCTAAT
GACCTAACCCAAAGGAGGAGTTATTTAAAGTGGGATCAGTACTGGGTGAAAGTCAACAAGTACAGTGAAGGAAATCTGACAGCTGGATTACCTCTAGGCTTTGTGCATACTACTGCTTTTGTATGTTG
GTTGTTATGCACTATACCTGCTCTTACTTCTACTTTATTTGATCTCCCTATCTAATTTCCCTGGTAAAGTGAATTTTATGAGTATAGGCTCTTCTCCACATTTACAATCTATAAAGTACAAGTACTAGT
TTTTTCTCTATTATGACAGGTTAAGTGTACCTGCTGTTCTTTTATTAATGTATTTTCTGGTATTTTCATATTACATGTTTATTTTCTAGACTATTATAGTGAATACTTAA

B

wCfe TTTTTCATAGTAATATCCCTAAGTAGATGTATATTTTATATATTAATGCTTTTGTATTGCAAAAACATATGACACTGTGATTATATACATAAATAATTTTTTAAAGTTGTTGAATA
EF121347 -----

wCfe GTTGAAGATTAAAATATTTCTAGAGTAGAAAATAAGGCGCAGCAGTATAAAGCTAAATTTATTTTATCGGATTTATCCGATGTACCCTCAACCTTTGATAGGTTGAAGTCTAAATTTGAGA
EF121347 -----

wCfe GTTTGATCTGGCTCAGAATGAACGCTGGCGGCAGGCCCTAACACATGCAAGTCAACGAGGTTATATTGTAGCTTGTATAGTATAACTTAGTGGCAGACGGGTGAGTAATGTATAGGAA
EF121347 -----AATGAACGCTGGCGGCAGGCCCTAACACATGCAAGTCAACGAGGTTATATTGTAGCTTGTATAGTATAACTTAGTGGCAGACGGGTGAGTAATGTATAGGAA
\*\*\*\*\*

wCfe TCTACCTAGTAGTACGGGACAATTTGCTGGAAACGGCACTAATACCTATACGCCCTACGGGGGAAAGATTATTGCTATTAGATGAGCCTATATTAGATTAGTTAGTTGGTGGGTAAT
EF121347 TCTACCTAGTAGTACGGGACAATTTGCTGGAAACGGCACTAATACCTATACGCCCTACGGGGGAAAGATTATTGCTATTAGATGAGCCTATATTAGATTAGTTAGTTGGTGGGTAAT
\*\*\*\*\*

wCfe GGCTACCAAGGCAATGATCTATAGTGTATGAGGATGATCAGCCACACTGGAACGTGAGATACGGTCCAGACTCTACGGGAGGCGAGTGGGAAATTTGGACAATGGCGAAAG
EF121347 GGCTACCAAGGCAATGATCTATAGTGTATGAGGATGATCAGCCACACTGGAACGTGAGATACGGTCCAGACTCTACGGGAGGCGAGCTGGGAAATTTGGACAATGGCGAAAG
\*\*\*\*\*

wCfe CCTGATCCAGCCATGCCCGATGAGTGAAGAAGCCCTTTGGGTGTAAGGCTTTTTCAGTGAAGGAATAATGACGGTACTCACAGAAGAAGTCTGGCTAACTCCGTGCCAGCAGCCGCG
EF121347 CCTGATCCAGCCATGCCCGATGAGTGAAGAAGCCCTTTGGGTGTAAGGCTTTTTCAGTGAAGGAATAATGACGGTACTCACAGAAGAAGTCTGGCTAACTCCGTGCCAGCAGCCGCG
\*\*\*\*\*

wCfe GTAATACGGAGAGGGCTAGCGTTATTTCGGAATTTATGGGCGTAAAGGCGCGTAGGCTGATTAGTAAAGTAAAAGTGAATCCCAAAGCTTAACTTTGGAATTGCTTTTAAAACCTGCTAA
EF121347 GTAATACGGAGAGGGCTAGCGTTATTTCGGAATTTATGGGCGTAAAGGCGCGTAGGCTGATTAGTAAAGTAAAAGTGAATCCCAAAGCTTAACTTTGGAATTGCTTTTAAAACCTGCTAA
\*\*\*\*\*

wCfe TCTAGAGATTGAAAGAGGATAGAGGAATTCCTAGTGTAGAGGTGAAATTCGTAATATATTAGGAGGAACACCAGTGGCGAAGGCGTCTATCTGGTTCAAATCTGACGCTGAGGCGGGAAGG
EF121347 TCTAGAGATTGAAAGAGGATAGAGGAATTCCTAGTGTAGAGGTGAAATTCGTAATATATTAGGAGGAACACCAGTGGCGAAGGCGTCTATCTGGTTCAAATCTGACGCTGAGGCGGGAAGG
\*\*\*\*\*

wCfe CGTGGGAGCAAAACAGGATTAGATACCTGCTAGTCCACGCTGTAACAGTGAATGTTAAATATGGGGAGTTACTTTCTGTATTACAGCTAACCGGTTAAACATCCGCCTGGGGACTA
EF121347 CGTGGGAGCAAAACAGGATTAGATACCTGCTAGTCCACGCTGTAACAGTGAATGTTAAATATGGGGAGTTACTTTCTGTATTACAGCTAACCGGTTAAACATCCGCCTGGGGACTA
\*\*\*\*\*

wCfe CGGTGCAAGATTAAAACCTCAAAGGAATTTGACGGGACCCGCACAAGCGGTGGAGCATGTGGTTAATTCGATGCAACGCGAAAACCTTACCACCTCTGACATGGAATTTATACCTAT
EF121347 CGGTGCAAGATTAAAACCTCAAAGGAATTTGACGGGACCCGCACAAGCGGTGGAGCATGTGGTTAATTCGATGCAACGCGAAAACCTTACCACCTCTGACATGGAATTTATACCTAT
\*\*\*\*\*

wCfe CCGAAGGGATGGGTCGGTTCGGCCGGATTTACACAGGTTGTCATGGCTGTCTGACGCTCGTGTCTGAGATGTTGGGTTAAGTCCCGCAACGAGCGCAACCCCTATCTCTAGTTACC
EF121347 CCGAAGGGATGGGTCGGTTCGGCCGGATTTACACAGGTTGTCATGGCTGTCTGACGCTCGTGTCTGAGATGTTGGGTTAAGTCCCGCAACGAGCGCAACCCCTATCTCTAGTTACC
\*\*\*\*\*

wCfe ATCAGGTAATGCTGGGAACCTTAAAGGAACTGCCAGTGAATAAATGGAGGAAGTGGGATGATGTCAGTCAATCATGCCCCTTATGGAGTGGGCTACACACGCTGCTACAATGGTGGCTA
EF121347 ATCAGGTAATGCTGGGAACCTTAAAGGAACTGCCAGTGAATAAATGGAGGAAGTGGGATGATGTCAGTCAATCATGCCCCTTATGGAGTGGGCTACACACGCTGCTACAATGGTGGCTA
\*\*\*\*\*

wCfe CAATGGGCTGCAAGTCCGAGGCTAAGCTAATCCCTTAAAGCCATCTCAGTTCCGATTGACTCTGCAACTCGAGTGCATGAAGTTGGAATCGTAGTAATCGTGGATCAGCATGCCA
EF121347 CAATGGGCTGCAAGTCCGAGGCTAAGCTAATCCCTTAAAGCCATCTCAGTTCCGATTGACTCTGCAACTCGAGTGCATGAAGTTGGAATCGTAGTAATCGTGGATCAGCATGCCA
\*\*\*\*\*

wCfe CGGTGAATACGTTCTCGGCTTTGTACACACTGCCCGTACGCCATGGGAATTTGGTTTCACTCGAAGCTAATGACCTAACCGCAAGGAGGAGTTATTTAAAGTGGGATCAGTACTGGG
EF121347 CGGTGAATACGTTCTCGGCTTTGTACACACTGCCCGTACGCCATGGGAATTTGGTTTCACTCGAAGCTAATGACCTAACCGCAAGGAGGAGTTATTTAAAGTGGGATCAGTACTGGG
\*\*\*\*\*

wCfe GTGAAGTCGTAACAAGGTAGCAGTAGGGGAATCTGCAAGCTGGATTACCTCCTTAGGCTTTGTGCATACCTACTGCTTTGATAGTGGTGTGTTATGCACTATACCTGCTTACTTTC
EF121347 GTG-----
\*\*\*

wCfe TACTTTATTTGATCTCCCTATTTCAATTTCTGGTAAATGGAATTTTATGAGTAGAGCCCTTTCTCCACATTTACAATCTATAAAGTACAAGTACTAGTTTTTTCTCTATTATG
EF121347 -----

wCfe CACAGGTTAAGTGGTACCTGCTGTTCTTTTATTAATGTATTTTCTGGTATTTTCATATTACATGTTTATTTTCTAGACTATTATAGTGAATACTTAA
EF121347 -----

**Supplementary fig. S2.** Generation of orthologous groups (OGs) of proteins across three *R. felis* genomes.

(A) FastOrthoMCL, an in-house modified version of OrthoMCL (Li, et al. 2003), was used to generate OGs from a total of 4,835 predicted proteins from the genomes of *R. felis* str. URRWXCal2, *R. felis* str. LSU and *R. felis* str. LSU-Lb (summarized in gray box at top left). Plasmid proteins were not included. Unique proteins (singletons) not grouped into OGs are distinguished by the dashed arrow, with statistics shown in the yellow box (top right). Characteristics of different OG categories are described moving throughout the flowchart (following the gray arrows). OGs unique to *R. felis* strains LSU and LSU-Lb (green box) were manually evaluated, with results shown in panel B. Several OGs unique to strain LSU or LSU-Lb (yellow box) were combined with singletons and manually evaluated, with results shown in panel C. Numbers shown on the Venn diagram in **fig. 1d** are the result of these manual evaluations. Total numbers of proteins per genome that were grouped into OGs are shown in the gray box at bottom left.

(B) Manual evaluation of singletons. Results for *R. felis* strains LSU and LSU-Lb are shown at left and right, respectively. All singletons were used as queries in BLASTP analyses against the NR database. Proteins were then separated into 'top hits to *R. felis* str. URRWXCal2' (top), 'top hits to other *Rickettsia* spp.' (middle), and 'top hits to other bacteria' (bottom: QL, query length; SL, subject length). A summary for the final singleton calculations for each genome is provided. Briefly, proteins with top hits to *R. felis* were determined to be fragments of larger proteins included in OGs with *R. felis* str. URRWXCal2, and were thus culled from the *R. felis* str. LSU and *R. felis* str. LSU-Lb accessory genomes (numbers adjusted in **fig. 1d**). Proteins having no significant matches in BLASTP searches, *R. felis* str. LSU ( $n = 19$ ) and *R. felis* str. LSU-lb ( $n = 12$ ) were also excluded from final tallies.

(C) Manual evaluation of 141 OGs containing proteins only from *R. felis* str. LSU and *R. felis* str. LSU-lb. All proteins were used as queries in BLASTP analyses against the NR database. Proteins were then separated into 'top hits to *R. felis* str. URRWXCal2' (top), 'top hits to other *Rickettsia* spp.' (middle), and 'top hits to other bacteria' (bottom: QL, query length; SL, subject length). A summary for the final calculation is provided. Briefly, proteins with top hits to *R. felis* were determined to be fragments of larger proteins included in OGs with *R. felis* str. URRWXCal2, and were thus culled from the portion of the accessory genome shared by both *R.*

*felis* str. LSU and *R. felis* str. LSU-Lb (number adjusted in [fig. 1d](#)). OGs with proteins having no significant matches in BLASTP searches ( $n = 28$ ) were also excluded from final tallies.

## Literature Cited

Li L, Stoeckert CJ, Jr., Roos DS 2003. OrthoMCL: identification of ortholog groups for eukaryotic genomes. *Genome research* 13: 2178-2189. doi: 10.1101/gr.1224503

**A**

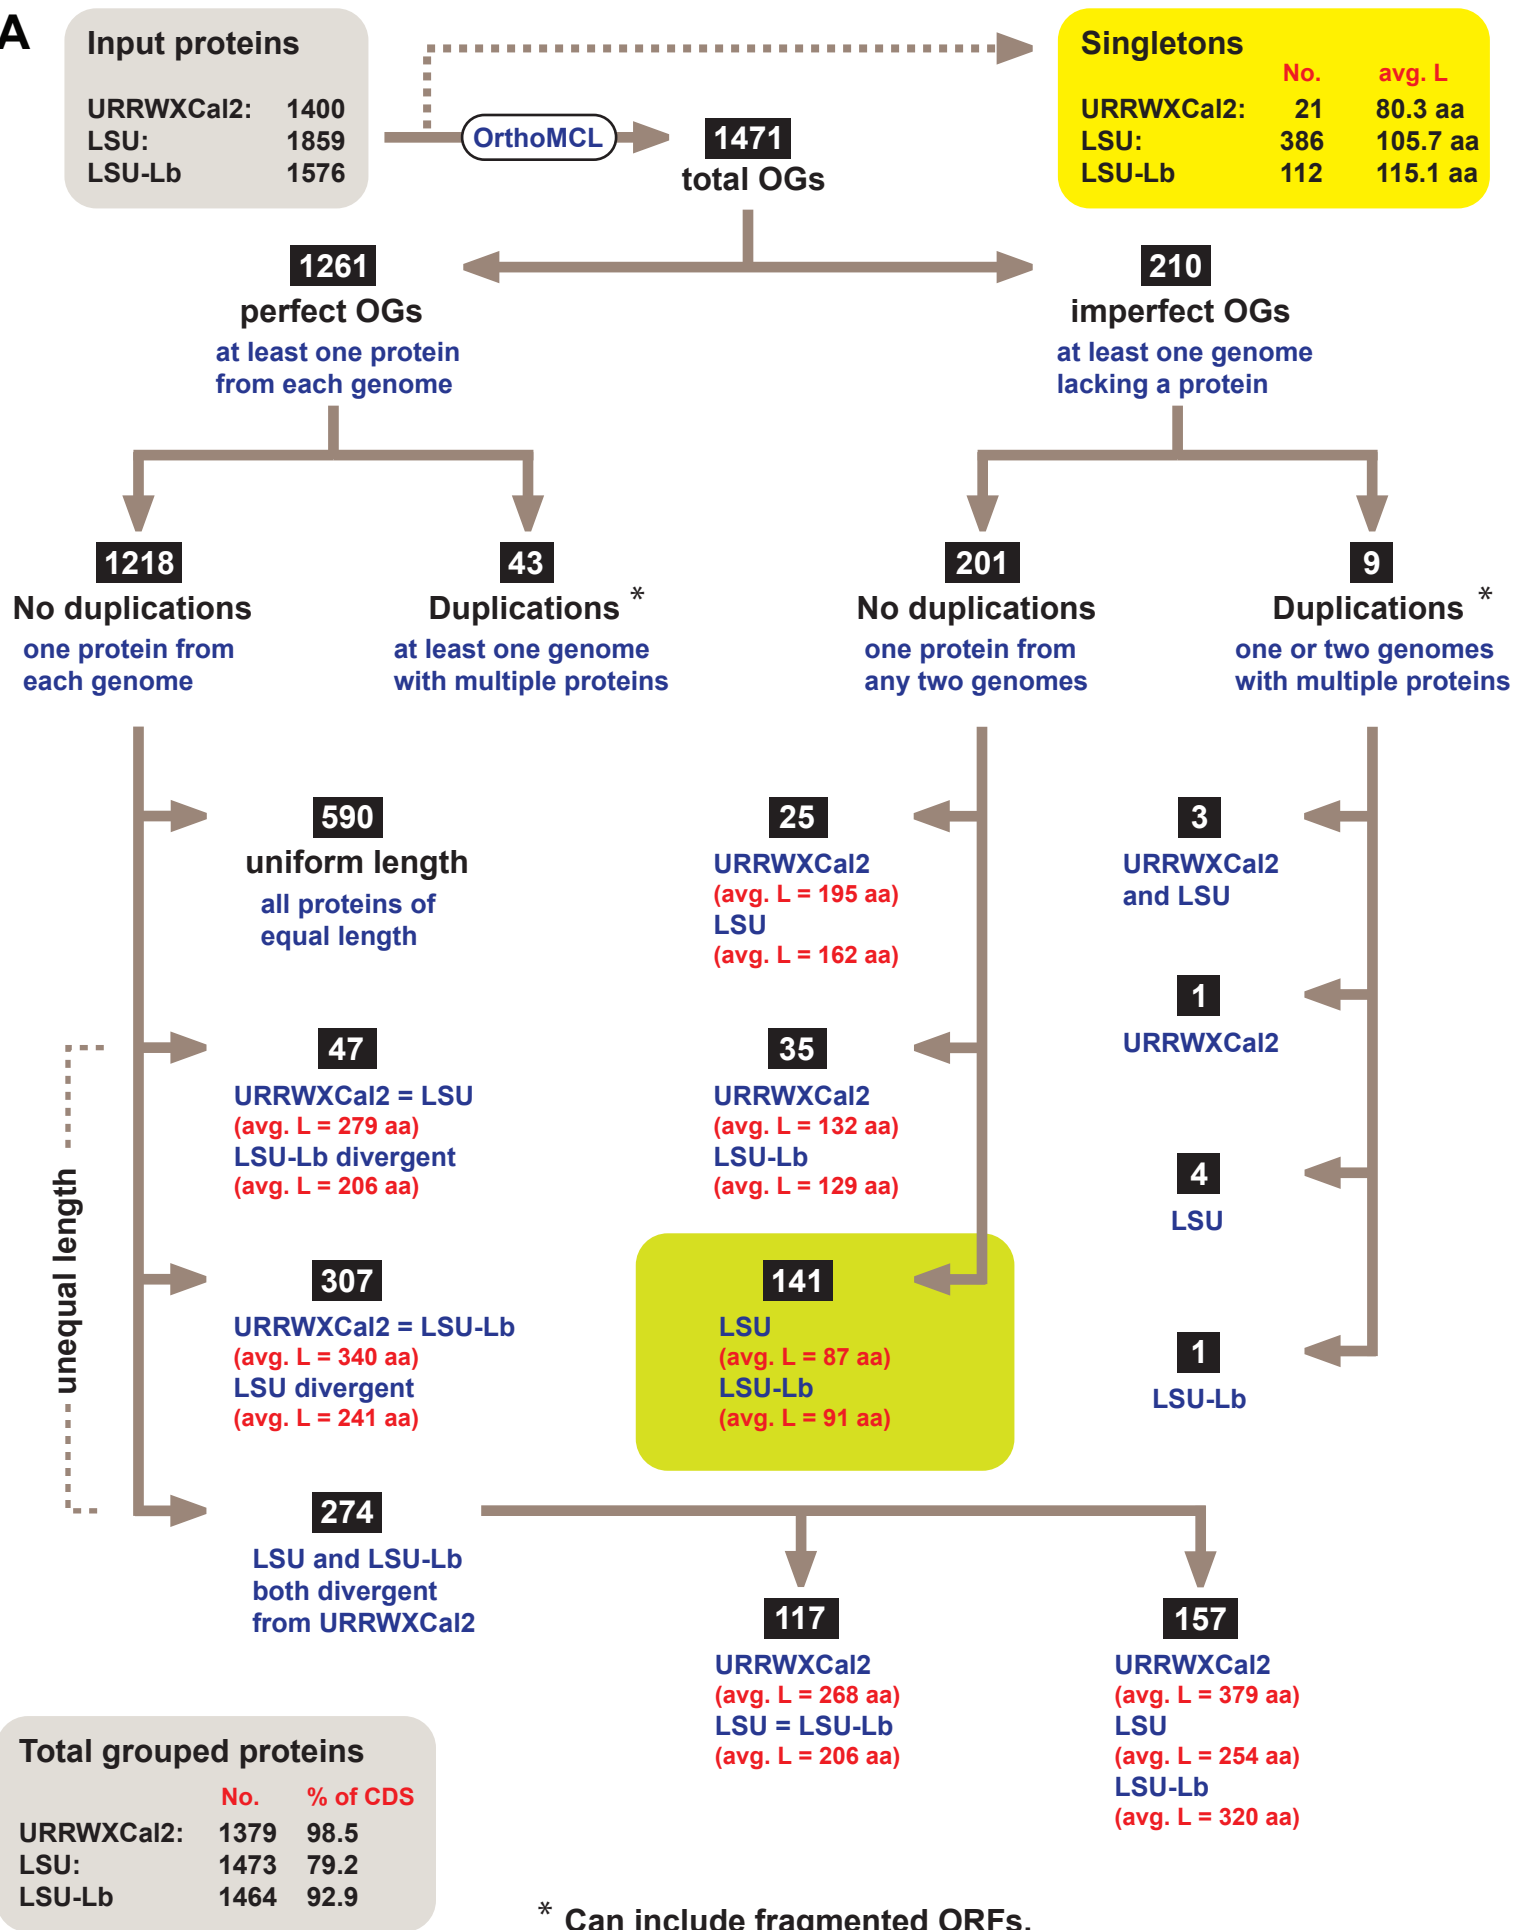

**B****Top hits to *R. felis* str. URRWXCa2**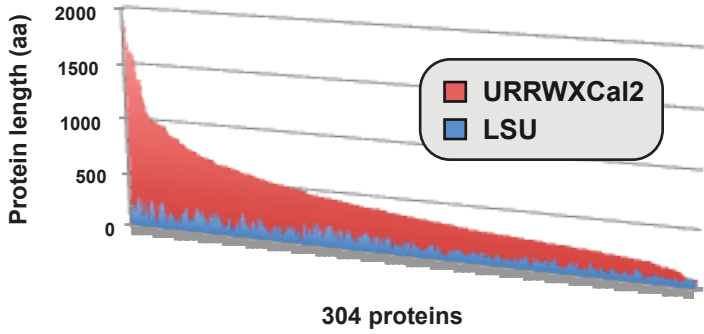**Top hits to *R. felis* str. URRWXCa2**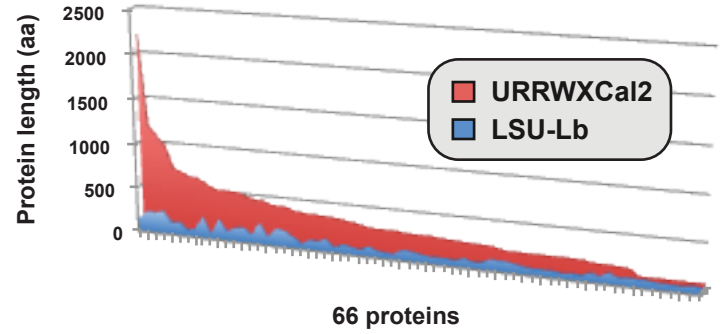**Top hits to other *Rickettsia* spp.**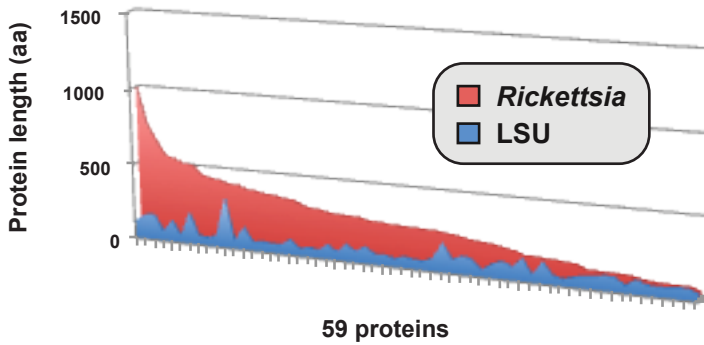**Top hits to other *Rickettsia* spp.**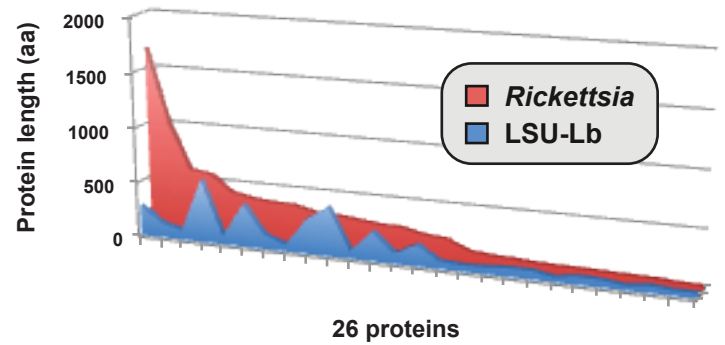**Top hits to other bacteria**

|                                                       | QL  | SL  |
|-------------------------------------------------------|-----|-----|
| Hypothetical protein: <i>Mycoplasma hyopneumoniae</i> | 103 | 177 |
| Hypothetical protein: Rickettsiaceae bacterium Os18   | 100 | 171 |
| Hypothetical protein: Rickettsiaceae bacterium Os18   | 125 | 147 |
| Hypothetical protein: Rickettsiaceae bacterium Os18   | 55  | 67  |

**Top hits to other bacteria**

|                                                                    | QL  | SL  |
|--------------------------------------------------------------------|-----|-----|
| Transposase: <i>Wolbachia</i> ( <i>Lissorhoptrus oryzophilus</i> ) | 59  | 443 |
| Transposase: <i>Burkholderia</i> sp. CCGE1002                      | 298 | 341 |
| Transposase: <i>Waddlia chondrophila</i> 2032/99                   | 92  | 335 |
| Transposase: <i>Wolbachia</i> ( <i>Culex quinquefasciatus</i> )    | 222 | 280 |
| Transposase: <i>Wolbachia</i> sp. wTai                             | 144 | 144 |
| Transposase: <i>Legionella drancourtii</i>                         | 74  | 130 |
| Hypothetical protein: <i>Bacillus</i> sp. 2_A_57_CT2               | 46  | 125 |
| Hypothetical protein: <i>Desulfovibrio bastinii</i>                | 89  | 96  |

**Summary**

304 protein fragments excluded  
 19 proteins lacking BLASTP matches removed  
 63 remaining *R. felis* str. LSU singletons

**Summary**

66 protein fragments excluded  
 12 proteins lacking BLASTP matches removed  
 34 remaining *R. felis* str. LSU-Lb singletons

**C****Top hits to *R. felis* str. URRWXCaI2**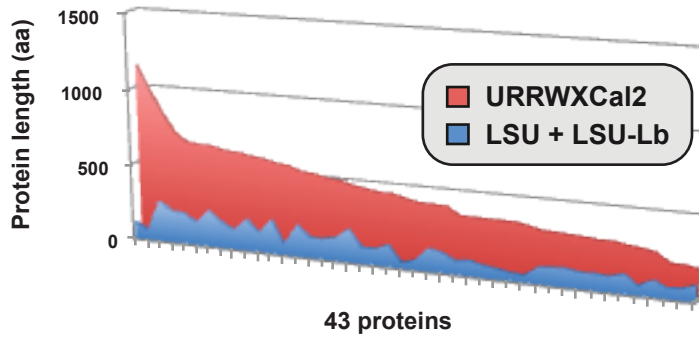**Top hits to other *Rickettsia* spp.**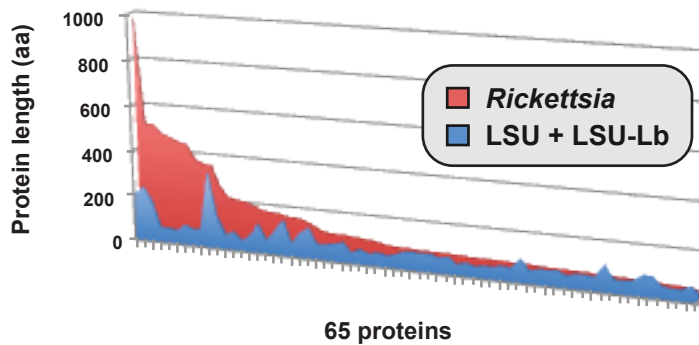**Top hits to other bacteria**

|                                                                               | QL  | SL  |
|-------------------------------------------------------------------------------|-----|-----|
| Conserved hypothetical protein: <i>Magnetospirillum gryphiswaldense</i> MSR-1 | 195 | 183 |
| Hypothetical protein: <i>Holospira undulata</i>                               | 49  | 127 |
| Hypothetical protein: <i>Corynebacterium pseudogenitalium</i>                 | 74  | 74  |
| Putative uncharacterized protein: <i>Azospirillum</i> sp. CAG:239             | 62  | 64  |
| Putative uncharacterized protein YcdV: <i>Escherichia coli</i>                | 60  | 63  |

**Summary**

- 43 OGs (protein fragments) excluded
- 28 proteins lacking BLASTP matches removed
- 48 remaining OGs shared by *R. felis* str. LSU and *R. felis* str. LSU-Lb

**Supplementary fig. S3.** Synteny analysis across three *R. felis* genomes (chromosomes).

Genome alignment was performed with the complete chromosome sequence of *Rickettsia felis* str. URRWXCal2 (NC\_007109), 21 stitched contigs from the *R. felis* str. LSU assembly, and 35 stitched contigs from the *R. felis* str. LSU-Lb assembly. Genome sequence alignments were performed using Mauve v.2.3.1, utilizing the “progressiveMauve” option [\(Darling, et al. 2010\)](#).

### Literature Cited

Darling AE, Mau B, Perna NT 2010. progressiveMauve: multiple genome alignment with gene gain, loss and rearrangement. PLoS One 5: e11147. doi: 10.1371/journal.pone.0011147



LSU-Lb

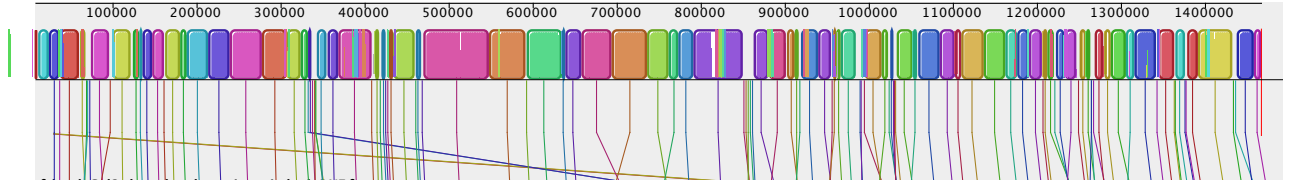

URRWXCaI2

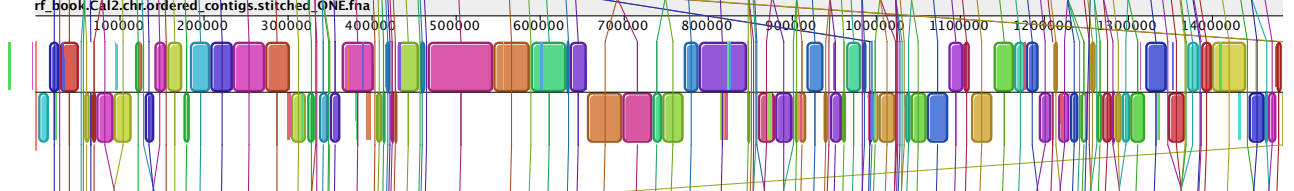

LSU

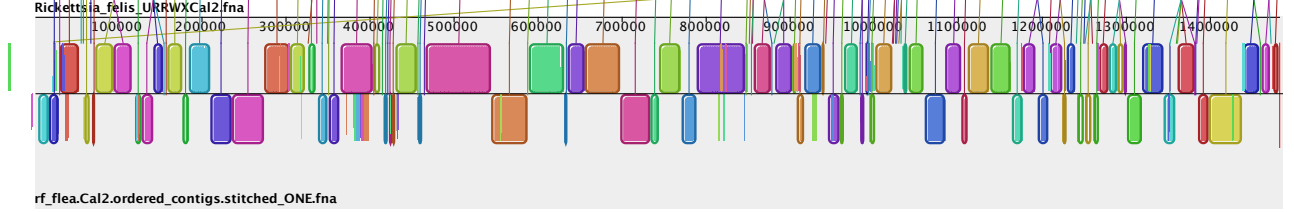

**Supplementary fig. S4.** Comparison of 16S rDNA, *gltA*, *sca0*, *sca4*, and *sca5* sequences across selected *R. felis* strains.

Aside from sequences derived from the genome assemblies, accession numbers for other *R. felis* strains (all associated with booklice) are provided. For the *R. felis* str. LSU 16S rDNA sequence, red indicates a portion of the sequence that was misassembled. Highlighted positions indicate variable characters shown in [fig. 1e](#) (NOTE: no variation was observed across *sca4* sequences, thus *sca4* was excluded from [fig. 1e](#)). Alignments were performed using MUSCLE v3.6 (default parameters) [\(Edgar 2004\)](#). Asterisks denote positions conserved across all input sequences.



Genomic variability in *Rickettsia felis* strains; SUPPLEMENTARY MATERIAL

LSU -----CCC  
Ca12 TAGGGTTGTAAAG-CTCTTTTAGC-AAGGAAGATAATGACGTTACTTGCAGAAAAAGCCC  
LSU-Lb TAGGGTTGTAAAG-CTCTTTTAGC-AAGGAAGATAATGACGTTACTTGCAGAAAAAGCCC  
AZ-Lb TAGGGTTGTAAAG-CTCTTTTAGC-AAGGAAGATAATGACGTTACTTGCAGAAAAAGCCC  
AZ-Lb2 TAGGGTTGTAAAG-CTCTTTTAGC-AAGGAAGATAATGACGTTACTTGCAGAAAAAGCCC  
AUS-Lb TAGGGTTGTAAAG-CTCTTTTAGC-AAGGAAGATAATGACGTTACTTGCAGAAAAAGCCC  
\* \* \*\*\*\*\* \*\* \*\* \*\* \* \* \* \* \* \* \* \* \* \* \*

LSU CGGCTAACTCCGTGCCAGCAGCCGCGGTAAGACGGAGGGGGCTAGCGTTGTTCCGAATTA  
Ca12 CGGCTAACTCCGTGCCAGCAGCCGCGGTAAGACGGAGGGGGCTAGCGTTGTTCCGAATTA  
LSU-Lb CGGCTAACTCCGTGCCAGCAGCCGCGGTAAGACGGAGGGGGCTAGCGTTGTTCCGAATTA  
AZ-Lb CGGCTAACTCCGTGCCAGCAGCCGCGGTAAGACGGAGGGGGCTAGCGTTGTTCCGAATTA  
AZ-Lb2 CGGCTAACTCCGTGCCAGCAGCCGCGGTAAGACGGAGGGGGCTAGCGTTGTTCCGAATTA  
AUS-Lb CGGCTAACTCCGTGCCAGCAGCCGCGGTAAGACGGAGGGGGCTAGCGTTGTTCCGAATTA  
\*\*\*\*\*

LSU CTGGGCGTAAAGAGTGCCTAGGCGGTTAGTAAAGTTGGAAGTGAAAGCCCGGGGCTTAAAC  
Ca12 CTGGGCGTAAAGAGTGCCTAGGCGGTTAGTAAAGTTGGAAGTGAAAGCCCGGGGCTTAAAC  
LSU-Lb CTGGGCGTAAAGAGTGCCTAGGCGGTTAGTAAAGTTGGAAGTGAAAGCCCGGGGCTTAAAC  
AZ-Lb CTGGGCGTAAAGAGTGCCTAGGCGGTTAGTAAAGTTGGAAGTGAAAGCCCGGGGCTTAAAC  
AZ-Lb2 CTGGGCGTAAAGAGTGCCTAGGCGGTTAGTAAAGTTGGAAGTGAAAGCCCGGGGCTTAAAC  
AUS-Lb CTGGGCGTAAAGAGTGCCTAGGCGGTTAGTAAAGTTGGAAGTGAAAGCCCGGGGCTTAAAC  
\*\*\*\*\*

LSU CTCGGAATTGCTTTCAAACACTACTAATCTAGAGTGTAGTAGGGGATGATGGAATTCCTAG  
Ca12 CTCGGAATTGCTTTCAAACACTACTAATCTAGAGTGTAGTAGGGGATGATGGAATTCCTAG  
LSU-Lb CTCGGAATTGCTTTCAAACACTACTAATCTAGAGTGTAGTAGGGGATGATGGAATTCCTAG  
AZ-Lb CTCGGAATTGCTTTCAAACACTACTAATCTAGAGTGTAGTAGGGGATGATGGAATTCCTAG  
AZ-Lb2 CTCGGAATTGCTTTCAAACACTACTAATCTAGAGTGTAGTAGGGGATGATGGAATTCCTAG  
AUS-Lb CTCGGAATTGCTTTCAAACACTACTAATCTAGAGTGTAGTAGGGGATGATGGAATTCCTAG  
\*\*\*\*\*

LSU TGTAGAGGTGAAATTCCTAGATATTAGGAGGAACACCGGTGGCGAAGGCGGTCATCTGGG  
Ca12 TGTAGAGGTGAAATTCCTAGATATTAGGAGGAACACCGGTGGCGAAGGCGGTCATCTGGG  
LSU-Lb TGTAGAGGTGAAATTCCTAGATATTAGGAGGAACACCGGTGGCGAAGGCGGTCATCTGGG  
AZ-Lb TGTAGAGGTGAAATTCCTAGATATTAGGAGGAACACCGGTGGCGAAGGCGGTCATCTGGG  
AZ-Lb2 TGTAGAGGTGAAATTCCTAGATATTAGGAGGAACACCGGTGGCGAAGGCGGTCATCTGGG  
AUS-Lb TGTAGAGGTGAAATTCCTAGATATTAGGAGGAACACCGGTGGCGAAGGCGGTCATCTGGG  
\*\*\*\*\*

LSU CTACAACCTGACGCTGATGCACGAAAGCGTGGGGAGCAAACAGGATTAGATACCCTGGTAC  
Ca12 CTACAACCTGACGCTGATGCACGAAAGCGTGGGGAGCAAACAGGATTAGATACCCTGGTAC  
LSU-Lb CTACAACCTGACGCTGATGCACGAAAGCGTGGGGAGCAAACAGGATTAGATACCCTGGTAC  
AZ-Lb CTACAACCTGACGCTGATGCACGAAAGCGTGGGGAGCAAACAGGATTAGATACCCTGGTAC  
AZ-Lb2 CTACAACCTGACGCTGATGCACGAAAGCGTGGGGAGCAAACAGGATTAGATACCCTGGTAC  
AUS-Lb CTACAACCTGACGCTGATGCACGAAAGCGTGGGGAGCAAACAGGATTAGATACCCTGGTAC  
\*\*\*\*\*

LSU TCCACGCCGTAACGATGAGTGTAGATATCGGAAGATTCTCTTTCGGTTTCGCAGCTAA  
Ca12 TCCACGCCGTAACGATGAGTGTAGATATCGGAAGATTCTCTTTCGGTTTCGCAGCTAA  
LSU-Lb TCCACGCCGTAACGATGAGTGTAGATATCGGAAGATTCTCTTTCGGTTTCGCAGCTAA  
AZ-Lb TCCACGCCGTAACGATGAGTGTAGATATCGGAAGATTCTCTTTCGGTTTCGCAGCTAA  
AZ-Lb2 TCCACGCCGTAACGATGAGTGTAGATATCGGAAGATTCTCTTTCGGTTTCGCAGCTAA  
AUS-Lb TCCACGCCGTAACGATGAGTGTAGATATCGGAAGATTCTCTTTCGGTTTCGCAGCTAA  
\*\*\*\*\*

LSU CGCATTAAGCACTCCGCCTGGGGAGTACGGTCGCAAGATTAAGCAAGGAATTGAC  
Ca12 CGCATTAAGCACTCCGCCTGGGGAGTACGGTCGCAAGATTAAGCAAGGAATTGAC  
LSU-Lb CGCATTAAGCACTCCGCCTGGGGAGTACGGTCGCAAGATTAAGCAAGGAATTGAC  
AZ-Lb CGCATTAAGCACTCCGCCTGGGGAGTACGGTCGCAAGATTAAGCAAGGAATTGAC  
AZ-Lb2 CGCATTAAGCACTCCGCCTGGGGAGTACGGTCGCAAGATTAAGCAAGGAATTGAC  
AUS-Lb CGCATTAAGCACTCCGCCTGGGGAGTACGGTCGCAAGATTAAGCAAGGAATTGAC  
\*\*\*\*\*

LSU GGGGGCTCGCACAAGCGGTGGAGCATGCGGTTAATTCGATGTTACGCGAAAAACCTTAC  
AZ-Lb GGGGGCTCGCACAAGCGGTGGAGCATGCGGTTAATTCGATGTTACGCGAAAAACCTTAC  
AZ-Lb2 GGGGGCTCGCACAAGCGGTGGAGCATGCGGTTAATTCGATGTTACGCGAAAAACCTTAC  
AUS-Lb GGGGGCTCGCACAAGCGGTGGAGCATGCGGTTAATTCGATGTTACGCGAAAAACCTTAC  
Ca12 GGGGGCTCGCACAAGCGGTGGAGCATGCGGTTAATTCGATGTTACGCGAAAAACCTTAC  
LSU-Lb GGGGGCTCGCACAAGCGGTGGAGCATGCGGTTAATTCGATGTTACGCGAAAAACCTTAC  
\*\*\*\*\*

Genomic variability in *Rickettsia felis* strains; SUPPLEMENTARY MATERIAL

LSU CAACCCCTTGACATGGTGGTCGCGGATCGCAGAGATGCTTTCCTTCAGCTCGGCTGGACCA  
Ca12 CAACCCCTTGACATGGTGGTCGCGGATCGCAGAGATGCTTTCCTTCAGCTCGGCTGGACCA  
LSU-Lb CAACCCCTTGACATGGTGGTCGCGGATCGCAGAGATGCTTTCCTTCAGCTCGGCTGGACCA  
AZ-Lb CAACCCCTTGACATGGTGGTCGCGGATCGCAGAGATGCTTTCCTTCAGCTCGGCTGGACCA  
AZ-Lb2 CAACCCCTTGACATGGTGGTCGCGGATCGCAGAGATGCTTTCCTTCAGCTCGGCTGGACCA  
AUS-Lb CAACCCCTTGACATGGTGGTCGCGGATCGCAGAGATGCTTTCCTTCAGCTCGGCTGGACCA  
\*\*\*\*\*

LSU CACACAGGTGTTGCATGGCTGTCGTGTCAGCTCGTGTGCTGAGATGTTGGGTTAAGTCCCGC  
Ca12 CACACAGGTGTTGCATGGCTGTCGTGTCAGCTCGTGTGCTGAGATGTTGGGTTAAGTCCCGC  
LSU-Lb CACACAGGTGTTGCATGGCTGTCGTGTCAGCTCGTGTGCTGAGATGTTGGGTTAAGTCCCGC  
AZ-Lb CACACAGGTGTTGCATGGCTGTCGTGTCAGCTCGTGTGCTGAGATGTTGGGTTAAGTCCCGC  
AZ-Lb2 CACACAGGTGTTGCATGGCTGTCGTGTCAGCTCGTGTGCTGAGATGTTGGGTTAAGTCCCGC  
AUS-Lb CACACAGGTGTTGCATGGCTGTCGTGTCAGCTCGTGTGCTGAGATGTTGGGTTAAGTCCCGC  
\*\*\*\*\*

LSU AACGAGCGCAACCCTCATTCTTATTTGCCAGCGGGTAATGCCGGAACTATAAGAAAACCT  
Ca12 AACGAGCGCAACCCTCATTCTTATTTGCCAGCGGGTAATGCCGGAACTATAAGAAAACCT  
LSU-Lb AACGAGCGCAACCCTCATTCTTATTTGCCAGCGGGTAATGCCGGAACTATAAGAAAACCT  
AZ-Lb AACGAGCGCAACCCTCATTCTTATTTGCCAGCGGGTAATGCCGGAACTATAAGAAAACCT  
AZ-Lb2 AACGAGCGCAACCCTCATTCTTATTTGCCAGCGGGTAATGCCGGAACTATAAGAAAACCT  
AUS-Lb AACGAGCGCAACCCTCATTCTTATTTGCCAGCGGGTAATGCCGGAACTATAAGAAAACCT  
\*\*\*\*\*

LSU GCCGGTGATAAGCCGGAGGAAGGTGGGGACGACGTC AAGTCATCATGGCCCTTACGGGTT  
Ca12 GCCGGTGATAAGCCGGAGGAAGGTGGGGACGACGTC AAGTCATCATGGCCCTTACGGGTT  
LSU-Lb GCCGGTGATAAGCCGGAGGAAGGTGGGGACGACGTC AAGTCATCATGGCCCTTACGGGTT  
AZ-Lb GCCGGTGATAAGCCGGAGGAAGGTGGGGACGACGTC AAGTCATCATGGCCCTTACGGGTT  
AZ-Lb2 GCCGGTGATAAGCCGGAGGAAGGTGGGGACGACGTC AAGTCATCATGGCCCTTACGGGTT  
AUS-Lb GCCGGTGATAAGCCGGAGGAAGGTGGGGACGACGTC AAGTCATCATGGCCCTTACGGGTT  
\*\*\*\*\*

LSU GGGCTACACGCGTGCTACAATGGTGT TTTACAGAGGGAAGCAAGACGGCGACGTGGAGCAA  
Ca12 GGGCTACACGCGTGCTACAATGGTGT TTTACAGAGGGAAGCAAGACGGCGACGTGGAGCAA  
LSU-Lb GGGCTACACGCGTGCTACAATGGTGT TTTACAGAGGGAAGCAAGACGGCGACGTGGAGCAA  
AZ-Lb GGGCTACACGCGTGCTACAATGGTGT TTTACAGAGGGAAGCAAGACGGCGACGTGGAGCAA  
AZ-Lb2 GGGCTACACGCGTGCTACAATGGTGT TTTACAGAGGGAAGCAAGACGGCGACGTGGAGCAA  
AUS-Lb GGGCTACACGCGTGCTACAATGGTGT TTTACAGAGGGAAGCAAGACGGCGACGTGGAGCAA  
\*\*\*\*\*

LSU ATCCCTAAAAGACATCTCAGTTCGGATTGTTCTCTGCAACTCGAGAGCATGAAGTTGGAA  
AZ-Lb ATCCCTAAAAGACATCTCAGTTCGGATTGTTCTCTGCAACTCGAGAGCATGAAGTTGGAA  
Ca12 ATCCCTAAAAGACATCTCAGTTCGGATTGTTCTCTGCAACTCGAGAGCATGAAGTTGGAA  
LSU-Lb ATCCCTAAAAGACATCTCAGTTCGGATTGTTCTCTGCAACTCGAGAGCATGAAGTTGGAA  
AZ-Lb ATCCCTAAAAGACATCTCAGTTCGGATTGTTCTCTGCAACTCGAGAGCATGAAGTTGGAA  
AZ-Lb2 ATCCCTAAAAGACATCTCAGTTCGGATTGTTCTCTGCAACTCGAGAGCATGAAGTTGGAA  
AUS-Lb ATCCCTAAAAGACATCTCAGTTCGGATTGTTCTCTGCAACTCGAGAGCATGAAGTTGGAA  
\*\*\*\*\*

LSU TCGCTAGTAATCGCGGATCAGCATGCCGCGGTGAATACGTTCTCGGGCCTTGTACACACT  
Ca12 TCGCTAGTAATCGCGGATCAGCATGCCGCGGTGAATACGTTCTCGGGCCTTGTACACACT  
LSU-Lb TCGCTAGTAATCGCGGATCAGCATGCCGCGGTGAATACGTTCTCGGGCCTTGTACACACT  
AZ-Lb TCGCTAGTAATCGCGGA-----  
AZ-Lb2 TCGCTAGTAATCGCGGAT-----  
AUS-Lb TCGCTAGTAATCGCGGAT-----  
\*\*\*\*\*

LSU GCCCGTCACGCCATGGGAGTTGGTTTTACCTGAAGGTGGTGAGCTAACGCAAGAGGCGAGC  
Ca12 GCCCGTCACGCCATGGGAGTTGGTTTTACCTGAAGGTGGTGAGCTAACGCAAGAGGCGAGC  
LSU-Lb GCCCGTCACGCCATGGGAGTTGGTTTTACCTGAAGGTGGTGAGCTAACGCAAGAGGCGAGC  
AZ-Lb -----  
AZ-Lb2 -----  
AUS-Lb -----

LSU CAACCACGGTAAAATTAGCGACTGGGGTGAAGTCGTAACAAGGTAGCCGTAGGGGAACCT  
Ca12 CAACCACGGTAAAATTAGCGACTGGGGTGAAGTCGTAACAAGGTAGCCGTAGGGGAACCT  
LSU-Lb CAACCACGGTAAAATTAGCGACTGGGGTGAAGTCGTAACAAGGTAGCCGTAGGGGAACCT  
AZ-Lb -----  
AZ-Lb2 -----  
AUS-Lb -----

# Genomic variability in *Rickettsia felis* strains; SUPPLEMENTARY MATERIAL

```
LSU          GCGGCTGGATTACCTCCTTA
Ca12         GCGGCTGGATTACCTCCTTA
LSU-Lb       GCGGCTGGATTACCTCCTTA
AZ-Lb        -----
AZ-Lb2       -----
AUS-Lb       -----
```

## ***gltA* sequences**

Ar2-Lb, *Rickettsia felis* clone Ar2 (GQ329873); As2-Lb, *Rickettsia felis* clone As2 (GQ329877).

```
Ca12         ATGACCAATGAAAATAGTAATGATTCAGAATTTGCCGAATTAATAATCAGAGGAAAAATA
LSU          ATGACCAATGAAAATAGTAATGATTCAGAATTTGCCGAATTAATAATCAGAGGAAAAATA
LSU-Lb       ATGACCAATGAAAATAGTAATGATTCAGAATTTGCCGAATTAATAATCAGAGGAAAAATA
Ar2-Lb       -----
As2-Lb       -----
```

```
Ca12         TTAAATTACCTATACTTAAAGCAAGTATTGGTGAGGATGTAATCGATATAAGCAGGGTA
LSU          TTAAATTACCTATACTTAAAGCAAGTATTGGTGAGGATGTAATCGATATAAGCAGGGTA
LSU-Lb       TTAAATTACCTATACTTAAAGCAAGTATTGGTGAGGATGTAATCGATATAAGCAGGGTA
Ar2-Lb       -----
As2-Lb       -----
```

```
Ca12         TCTTCGGAAGCCGATTGTTTTACTTATGACCCGGGCTTTATGTCTACTGCTTCTTGTCAG
LSU          TCTTCGGAAGCCGATTGTTTTACTTATGACCCGGGCTTTATGTCTACTGCTTCTTGTCAG
LSU-Lb       TCTTCGGAAGCCGATTGTTTTACTTATGACCCGGGCTTTATGTCTACTGCTTCTTGTCAG
Ar2-Lb       -----
As2-Lb       -----
```

```
Ca12         TCTACTATCACTTATATAGACGGTGATAAAGGAATCTTGCGACATCGAGGATATGACATT
LSU          TCTACTATCACTTATATAGACGGTGATAAAGGAATCTTGCGACATCGAGGATATGACATT
LSU-Lb       TCTACTATCACTTATATAGACGGTGATAAAGGAATCTTGCGACATCGAGGATATGACATT
Ar2-Lb       -----
As2-Lb       -----
```

```
Ca12         AAAGATTTAGCCGAGAAAAGTGATTTTTTAGAAGTGGCATAATTTGCTAATCTACGGAGAA
LSU          AAAGATTTAGCCGAGAAAAGTGATTTTTTAGAAGTGGCATAATTTGCTAATCTACGGAGAA
LSU-Lb       AAAGATTTAGCCGAGAAAAGTGATTTTTTAGAAGTGGCATAATTTGCTAATCTACGGAGAA
Ar2-Lb       -----
As2-Lb       -----
```

```
Ca12         TTGCCAAGCATCGAGCAGTATAATAATTTCACTAACAGGTTGCTCATCATTATTAGTG
LSU          TTGCCAAGCATCGAGCAGTATAATAATTTCACTAACAGGTTGCTCATCATTATTAGTG
LSU-Lb       TTGCCAAGCATCGAGCAGTATAATAATTTCACTAACAGGTTGCTCATCATTATTAGTG
Ar2-Lb       -----
As2-Lb       -----
```

```
Ca12         AATGAAAGATTACACTATTTATTTCAAACATTTTGTAGCTCTTCTCATCCTATGGCTATT
LSU          AATGAAAGATTACACTATTTATTTCAAACATTTTGTAGCTCTTCTCATCCTATGGCTATT
LSU-Lb       AATGAAAGATTACACTATTTATTTCAAACATTTTGTAGCTCTTCTCATCCTATGGCTATT
Ar2-Lb       -----
As2-Lb       -----
```

```
Ca12         ATGCTTGCGGCCGTTGGTTCTTTTCGGCATTTTATCCTGATTTACTGAATTTAAAGAA
LSU          ATGCTTGCGGCCGTTGGTTCTTTTCGGCATTTTATCCTGATTTACTGAATTTAAAGAA
LSU-Lb       ATGCTTGCGGCCGTTGGTTCTTTTCGGCATTTTATCCTGATTTACTGAATTTAAAGAA
Ar2-Lb       -----
As2-Lb       -----
```

Genomic variability in *Rickettsia felis* strains; SUPPLEMENTARY MATERIAL

Cal2 GCAGACTACGAACTTACCGCTATTAGAATGATTGCTAAGATACCAACTATCGCCGCAATG  
 LSU GCAGACTACGAACTTACCGCTATTAGAATGATTGCTAAGATACCAACTATCGCCGCAATG  
 LSU-Lb GCAGACTACGAACTTACCGCTATTAGAATGATTGCTAAGATACCAACTATCGCCGCAATG  
 Ar2-Lb -----  
 As2-Lb -----

Cal2 TCCTATAAATATTCTATAGGACAACCGTTTATTTATCCTGATAATTCGTTAGATTTTACT  
 LSU TCCTATAAATATTCTATAGGACAACCGTTTATTTATCCTGATAATTCGTTAGATTTTACT  
 LSU-Lb TCCTATAAATATTCTATAGGACAACCGTTTATTTATCCTGATAATTCGTTAGATTTTACT  
 Ar2-Lb -----  
 As2-Lb -----

Cal2 GAAAATTTTCTGCATATGATGTTTGCAACGCCTTGTACAAAATATAAAGTAAATCCAATA  
 LSU GAAAATTTTCTGCATATGATGTTTGCAACGCCTTGTACAAAATATAAAGTAAATCCAATA  
 LSU-Lb GAAAATTTTCTGCATATGATGTTTGCAACGCCTTGTACAAAATATAAAGTAAATCCAATA  
 Ar2-Lb -----  
 As2-Lb -----

Cal2 ATAAAAATGCTCTTAATAAAATATTTATTTCTGCATGCTGACCATGAGCAGAACGCTTCT  
 LSU ATAAAAATGCTCTTAATAAAATATTTATTTCTGCATGCTGACCATGAGCAGAACGCTTCT  
 LSU-Lb ATAAAAATGCTCTTAATAAAATATTTATTTCTGCATGCTGACCATGAGCAGAACGCTTCT  
 Ar2-Lb -----  
 As2-Lb -----

Cal2 ACTTCAACAGTCCGAATTGCCGGCTCATCCGGGGCTAACCCTTTGGCTTGCCTAAGTACA  
 LSU ACTTCAACAGTCCGAATTGCCGGCTCATCCGGGGCTAACCCTTTGGCTTGCCTAAGTACA  
 LSU-Lb ACTTCAACAGTCCGAATTGCCGGCTCATCCGGGGCTAACCCTTTGGCTTGCCTAAGTACA  
 Ar2-Lb -----  
 As2-Lb -----

Cal2 GGGATTGCCTCACTTTGGGGCCTGCCACGCGGGGCTAATGAAGCGGTAATAAATATG  
 LSU GGGATTGCCTCACTTTGGGGCCTGCCACGCGGGGCTAATGAAGCGGTAATAAATATG  
 LSU-Lb GGGATTGCCTCACTTTGGGGCCTGCCACGCGGGGCTAATGAAGCGGTAATAAATATG  
 Ar2-Lb -----GGGACCTGCTCACGCGGGGCTAATGAAGCGGTAATAAATATG  
 As2-Lb -----GGGACCTGCTCACGCGGGGCTAATGAAGCGGTAATAAATATG  
 \*\*\* \*\*\*\*\* \*\*\*\*\*

Cal2 CTTAAAGAAATCGGTAGTTCTGAGAATATTCCTAAATATATAGCTAAAGCTAAGGATAAA  
 LSU CTTAAAGAAATCGGTAGTTCTGAGAATATTCCTAAATATATAGCTAAAGCTAAGGATAAA  
 LSU-Lb CTTAAAGAAATCGGTAGTTCTGAGAATATTCCTAAATATATAGCTAAAGCTAAGGATAAA  
 Ar2-Lb CTTAAAGAAATCGGTAGTTCTGAGAATATTCCTAAATATATAGCTAAAGCTAAGGATAAA  
 As2-Lb CTTAAAGAAATCGGTAGTTCTGAGAATATTCCTAAATATATAGCTAAAGCTAAGGATAAA  
 \*\*\*\*\*

Cal2 AATGATCCGTTTAGGTTAATGGGTTTCGGTCATCGTGTTTATAAAAATATGACCCACGT  
 LSU AATGATCCGTTTAGGTTAATGGGTTTCGGTCATCGTGTTTATAAAAATATGACCCACGT  
 LSU-Lb AATGATCCGTTTAGGTTAATGGGTTTCGGTCATCGTGTTTATAAAAATATGACCCACGT  
 Ar2-Lb AATGATCCGTTTAGGTTAATGGGTTTCGGTCATCGTGTTTATAAAAATATGACCCACGT  
 As2-Lb AATGATCCGTTTAGGTTAATGGGTTTCGGTCATCGTGTTTATAAAAATATGACCCACGT  
 \*\*\*\*\*

Cal2 GCCGCAGTACTTAAAGAACTTGCAAAGAAGTATTAAGGAACTCGGACAGCTAGAAAAC  
 LSU GCCGCAGTACTTAAAGAACTTGCAAAGAAGTATTAAGGAACTCGGACAGCTAGAAAAC  
 LSU-Lb GCCGCAGTACTTAAAGAACTTGCAAAGAAGTATTAAGGAACTCGGACAGCTAGAAAAC  
 Ar2-Lb GCCGCAGTACTTAAAGAACTTGCAAAGAAGTATTAAGGAACTCGGACAGCTAGAAAAC  
 As2-Lb GCCGCAGTACTTAAAGAACTTGCAAAGAAGTATTAAGGAACTCGGACAGCTAGAAAAC  
 \*\*\*\*\*

Cal2 AATCCGCTTTTGCAAATAGCAATAGAACTTGAAGCTATCGCTCTTAAAGATGAATATTTT  
 LSU AATCCGCTTTTGCAAATAGCAATAGAACTTGAAGCTATCGCTCTTAAAGATGAATATTTT  
 LSU-Lb AATCCGCTTTTGCAAATAGCAATAGAACTTGAAGCTATCGCTCTTAAAGATGAATATTTT  
 Ar2-Lb AATCCGCTTTTGCAAATAGCAATAGAACTTGAAGCTATCGCTCTTAAAGATGAATATTTT  
 As2-Lb AATCCGCTTTTGCAAATAGCAATAGAACTTGAAGCTATCGCTCTTAAAGATGAATATTTT  
 \*\*\*\*\*

# Genomic variability in *Rickettsia felis* strains; SUPPLEMENTARY MATERIAL

Cal2 ATTGAGAGAAAATTATATCCAAATGTTGATTTTATTCAGGTATTATCTATAAAGCTATG  
LSU ATTGAGAGAAAATTATATCCAAATGTTGATTTTATTCAGGTATTATCTATAAAGCTATG  
LSU-Lb ATTGAGAGAAAATTATATCCAAATGTTGATTTTATTCAGGTATTATCTATAAAGCTATG  
Ar2-Lb ATTGAGAGAAAATTATATCCAAATGTTGATTTTATTCAGGTATTATCTATAAAGCTATG  
As2-Lb ATTGAGAGAAAATTATATCCAAATGTTGATTTTATTCAGGTATTATCTATAAAGCTATG  
\*\*\*\*\*

Cal2 GGTATACCGTCGCAAATGTTTACGGTACTTTTGAATAGCAAGAACCCTAGGCTGGATG  
LSU GGTATACCGTCGCAAATGTTTACGGTACTTTTGAATAGCAAGAACCCTAGGCTGGATG  
LSU-Lb GGTATACCGTCGCAAATGTTTACGGTACTTTTGAATAGCAAGAACCCTAGGCTGGATG  
Ar2-Lb GGTATACCGTCGCAAATGTTTACTGTACTTTTGAATA-----  
As2-Lb GGTATACCGTCGCAAATGTTTACTGTACTTTTGAATA-----  
\*\*\*\*\* \*\* \*\*\*\*\*

Cal2 GCACAGTGAAAGAAATGCACGAAGACCCCTGAACAAAAATCAGCAGACCTAGACAGCTT  
LSU GCACAGTGAAAGAAATGCACGAAGACCCCTGAACAAAAATCAGCAGACCTAGACAGCTT  
LSU-Lb GCACAGTGAAAGAAATGCACGAAGACCCCTGAACAAAAATCAGCAGACCTAGACAGCTT  
Ar2-Lb -----  
As2-Lb -----

Cal2 TACACCGGTTATGTACATAGAGAGTATAAGGGTATCGGGGAGAGGTAG  
LSU TACACCGGTTATGTACATAGAGAGTATAAGGGTATCGGGGAGAGGTAG  
LSU-Lb TACACCGGTTATGTACATAGAGAGTATAAGGGTATCGGGGAGAGGTAG  
Ar2-Lb -----  
As2-Lb -----

## sca0 sequences

As5-Lb, *Rickettsia felis* clone As5 (GQ329880).

Cal2 TTGCAAGCAGTGTTAATGCAAAAAGGTGCGGCGACGCTCGGCGATACTACAAGTTTTGCCG  
LSU TTGCAAGCAGTGTTAATGCAAAAAGGTGCGGCGACGCTCGGCGATACTACAAGTTTTGCCG  
LSU-Lb TTGCAAGCAGTGTTAATGCAAAAAGGTGCGGCGACGCTCGGCGATACTACAAGTTTTGCCG  
As5-Lb TTGCAAGCAGTGTTAATGCAAAAAGGTGCGGCGACGCTCGGCGATACTACAAGTTTTGCCG  
\*\*\*\*\*

Cal2 ATATATTTACTAACACCGGTGCAGTTACTTTAGCTAAAGCTTCTATCACTAATTTTGCTA  
LSU ATATATTTACTAACACCGGTGCAGTTACTTTAGCTAAAGCTTCTATCACTAATTTTGCTA  
LSU-Lb ATATATTTACTAACACCGGTGCAGTTACTTTAGCTAAAGCTTCTATCACTAATTTTGCTA  
As5-Lb ATATATTTACTAACACCGGTGCAGTTACTTTAGCTAAAGCTTCTATCACTAATTTTGCTA  
\*\*\*\*\*

Cal2 AAAACGTAACGGCTACCAGCTTTGCAGCTAACAAATGCTACTATTAATTTTCGGTAATAGCC  
LSU AAAACGTAACGGCTACCAGCTTTGCAGCTAACAAATGCTACTATTAATTTTCGGTAATAGCC  
LSU-Lb AAAACGTAACGGCTACCAGCTTTGCAGCTAACAAATGCTACTATTAATTTTCGGTAATAGCC  
As5-Lb AAAACGTAACGGCTACCAGCTTTGCAGCTAACAAATGCTACTATTAATTTTCGGTAATAGCC  
\*\*\*\*\*

Cal2 TAGCCTTTAATAGTAATATAACAGGTAGCGGTACTACACTTACTTTAGGTGCAAGCCAAG  
LSU TAGCCTTTAATAGTAATATAACAGGTAGCGGTACTACACTTACTTTAGGTGCAAGCCAAG  
LSU-Lb TAGCCTTTAATAGTAATATAACAGGTAGCGGTACTACACTTACTTTAGGTGCAAGCCAAG  
As5-Lb TAGCCTTTAATAGTAATATAACAGGTAGCGGTACTACACTTACTTTAGGTGCAAGCCAAG  
\*\*\*\*\*

Cal2 TAACATATACCGGCACCGGTAGCTTTACTGATACGCTAACCTTAAATACTACTTTTGACG  
LSU TAACATATACCGGCACCGGTAGCTTTACTGATACGCTAACCTTAAATACTACTTTTGACG  
LSU-Lb TAACATATACCGGCACCGGTAGCTTTACTGATACGCTAACCTTAAATACTACTTTTGACG  
As5-Lb TAACATATACCGGCACCGGTAGCTTTACTGATACGCTAACCTTAAATACTACTTTTGACG  
\*\*\*\*\*

Cal2 GAGCAGCTAAGTCAGGCGGTAATATCTTAATTAAATCAGGTAGTACTCTTGATTTATCAG  
LSU GAGCAGCTAAGTCAGGCGGTAATATCTTAATTAAATCAGGTAGTACTCTTGATTTATCAG  
LSU-Lb GAGCAGCTAAGTCAGGCGGTAATATCTTAATTAAATCAGGTAGTACTCTTGATTTATCAG  
As5-Lb GAGCAGCTAAGTCAGGCGGTAATATCTTAATTAAATCAGGTAGTACTCTTGATTTATCAG  
\*\*\*\*\*



Genomic variability in *Rickettsia felis* strains; SUPPLEMENTARY MATERIAL

Cal2 GGGTTTCAACTTTAGCACTTGTGTTACTGCTACTAATTTTGACATTAATAATATAAGCC  
LSU GGGTTTCAACTTTAGCACTTGTGTTACTGCTACTAATTTTGACATTAATAATATAAGCC  
LSU-Lb GGGTTTCAACTTTAGCACTTGTGTTACTGCTACTAATTTTGACATTAATAATATAAGCC  
As5-Lb GGGTTTCAACTTTAGCACTTGTGTTACTGCTACTAATTTTGACATTAATAATATAAGCC  
\*\*\*\*\*

Cal2 CGGATACAAAATATACGGTAATATCTGCAGAAACGGAAGCGGTTTAAAGCCTACTCCCG  
LSU CGGATACAAAATATACGGTAATATCTGCAGAAACGGAAGCGGTTTAAAGCCTACTCCCG  
LSU-Lb CGGATACAAAATATACGGTAATATCTGCAGAAACGGAAGCGGTTTAAAGCCTACTCCCG  
As5-Lb CGGATACAAAATATACGGTAATATCTGCAGAAACGGAAGCGGTTTAAAGCCTACTCCCG  
\*\*\*\*\*

Cal2 AAGAGAATGTTAAAATAACTATTAACAATGATAACCGTTTTGTTGACTTTACTTTTGTATG  
LSU AAGAGAATGTTAAAATAACTATTAACAATGATAACCGTTTTGTTGACTTTACTTTTGTATG  
LSU-Lb AAGAGAATGTTAAAATAACTATTAACAATGATAACCGTTTTGTTGACTTTACTTTTGTATG  
As5-Lb AAGAGAATGTTAAAATAACTATTAACAATGATAACCGTTTTGTTGACTTTACTTTTGTATG  
\*\*\*\*\*

Cal2 CATCGACTTTAACGTTATTTGCTGAAGATATAGCTGAAGATGTTATAGATGAAGATTTTG  
LSU CATCGACTTTAACGTTATTTGCTGAAGATATAGCTGAAGATGTTATAGATGAAGATTTTG  
LSU-Lb CATCGACTTTAACGTTATTTGCTGAAGATATAGCTGAAGATGTTATAGATGAAGATTTTG  
As5-Lb CATCGACTTTAACGTTATTTGCTGAAGATATAGCTGAAGATGTTATAGATGAAGATTTTG  
\*\*\*\*\*

Cal2 AACCAGGCGGACCGCTTGCAAATATCCCGAATGCTGCAAATATAAAGAAATCGCTTGAGT  
LSU AACCAGGCGGACCGCTTGCAAATATCCCGAATGCTGCAAATATAAAGAAATCGCTTGAGT  
LSU-Lb AACCAGGCGGACCGCTTGCAAATATCCCGAATGCTGCAAATATAAAGAAATCGCTTGAGT  
As5-Lb AACCAGGCGGACCGCTTGCAAATATCCCGAATGCTGCAAATATAAAGAAATCGCTTGAGT  
\*\*\*\*\*

Cal2 TAATGGAAGATGCTCCAACGGTTCGGATGTACGTCAAGCTTTCATAAATTTTCGGCTTTA  
LSU TAATGGAAGATGCTCCAACGGTTCGGATGTACGTCAAGCTTTCATAAATTTTCGGCTTTA  
LSU-Lb TAATGGAAGATGCTCCAACGGTTCGGATGTACGTCAAGCTTTCATAAATTTTCGGCTTTA  
As5-Lb TAATGGAAGATGCTCCAACGGTTCGGATGTACGTCAAGCTTTCATAAATTTTCGGCTTTA  
\*\*\*\*\*

Cal2 TGACGCCGCAACAAGAAGCAGATGCTGTAACACCTTATACAAGATGTTGTAAAACCTA  
LSU TGACGCCGCAACAAGAAGCAGATGCTGTAACACCTTATACAAGATGTTGTAAAACCTA  
LSU-Lb TGACGCCGCAACAAGAAGCAGATGCTGTAACACCTTATACAAGATGTTGTAAAACCTA  
As5-Lb TGACGCCGCAACAAGAAGCAGATGCTGTAACACCTTATACAAGATGTTGTAAAACCTA  
\*\*\*\*\*

Cal2 GCGTACTATAGCTGCTATTAATAATCAAGTATACTAAGTAAATATCTCAAGTAGCTTAA  
LSU GCGTACTATAGCTGCTATTAATAATCAAGTATACTAAGTAAATATCTCAAGTAGCTTAA  
LSU-Lb GCGTACTATAGCTGCTATTAATAATCAAGTATACTAAGTAAATATCTCAAGTAGCTTAA  
As5-Lb GCGTACTATAGCTGCTATTAATAATCAAGTATACTAAGTAAATATCTCAAGTAGCTTAA  
\*\*\*\*\*

Cal2 TTAATCTAAATGCTAGAATGGATGCAATACAGCCCGGCTGCCGTAGCTGCCGGTGATGAG  
LSU TTAATCTAAATGCTAGAATGGATGCAATACAGCCCGGCTGCCGTAGCTGCCGGTGATGAG  
LSU-Lb TTAATCTAAATGCTAGAATGGATGCAATACAGCCCGGCTGCCGTAGCTGCCGGTGATGAG  
As5-Lb TTAATCTAAATGCTAGAATGGATGCAATACAGCCCGGCTGCCGTAGCTGCCGGTGATGAG  
\*\*\*\*\*

Cal2 GACAGAGATGCTAAGTTTGGTGCATGGATAAGTCCGTTTGTGCGTAATGCAACGCAGAAG  
LSU GACAGAGATGCTAAGTTTGGTGCATGGATAAGTCCGTTTGTGCGTAATGCAACGCAGAAG  
LSU-Lb GACAGAGATGCTAAGTTTGGTGCATGGATAAGTCCGTTTGTGCGTAATGCAACGCAGAAG  
As5-Lb GACAGAGATGCTAAGTTTGGTGCATGGATAAGTCCGTTTGTGCGTAATGCAACGCAGAAG  
\*\*\*\*\*

Cal2 ATGCGTAACAATATAAGCGGTTATAAGTCTGATACAACCGGTGGCACTATAGGTTTTGAC  
LSU ATGCGTAACAATATAAGCGGTTATAAGTCTGATACAACCGGTGGCACTATAGGTTTTGAC  
LSU-Lb ATGCGTAACAATATAAGCGGTTATAAGTCTGATACAACCGGTGGCACTATAGGTTTTGAC  
As5-Lb ATGCGTAACAATATAAGCGGTTATAAGTCTGATACAACCGGTGGCACTATAGGTTTTGAC  
\*\*\*\*\*

Cal2 GGCTTAGTTAACGATGATTTAGCACTCGGGCTTGCATATACAAGAGCCGATACCGATATT  
LSU GGCTTAGTTAACGATGATTTAGCACTCGGGCTTGCATATACAAGAGCCGATACCGATATT  
LSU-Lb GGCTTAGTTAACGATGATTTAGCACTCGGGCTTGCATATACAAGAGCCGATACCGATATT  
As5-Lb GGCTTAGTTAACGATGATTTAGCACTCGGGCTTGCATATACAAGAGCCGATACCGATATT  
\*\*\*\*\*

## Genomic variability in *Rickettsia felis* strains; SUPPLEMENTARY MATERIAL

Cal2 AAGCTGAAAAATAATAAGACGGGCGATAAGAATAAGGTAGAGAGTAACATCTATTCCGTA  
LSU AAGCTGAAAAATAATAAGACGGGCGATAAGAATAAGGTAGAGAGTAACATCTATTCCGTA  
LSU-Lb AAGCTGAAAAATAATAAGACGGGCGATAAGAATAAGGTAGAGAGTAACATCTATTCCGTA  
As5-Lb AAGCTGAAAAATAATAAGACGGGCGATAAGAATAAGGTAGAGAGTAACATCTATTCCGTA  
\*\*\*\*\*

Cal2 TACGGTTTATATAATGTACCTTATGAAAATCTTTTCGTTGAAGCTATAGCATCTTACTCG  
LSU TACGGTTTATATAATGTACCTTATGAAAATCTTTTCGTTGAAGCTATAGCATCTTACTCG  
LSU-Lb TACGGTTTATATAATGTACCTTATGAAAATCTTTTCGTTGAAGCTATAGCATCTTACTCG  
As5-Lb TACGGTTTATATAATGTACCTTATGAAAATCTTTTCGTTGAAGCTATAGCATCTTACTCG  
\*\*\*\*\*

Cal2 GATAATAGGATAAAAAGCAAATCAAGACGTTATTGCAACGGCCTAGAGACTGTCCGGC  
LSU GATAATAGGATAAAAAGCAAATCAAGACGTTATTGCAACGGCCTAGAGACTGTCCGGC  
LSU-Lb GATAATAGGATAAAAAGCAAATCAAGACGTTATTGCAACGGCCTAGAGACTGTCCGGC  
As5-Lb GATAATAGGATAAAAAGCAAATCAAGACGTTATTGCAACGGCCTAGAGACTGTCCGGC  
\*\*\*\*\*

Cal2 TATCAAACCGCAAGCGGTAAGTATAAATCTGAAAGCTATACAGGTCAGTTAATGGCTGGT  
LSU TATCAAACCGCAAGCGGTAAGTATAAATCTGAAAGCTATACAGGTCAGTTAATGGCTGGT  
LSU-Lb TATCAAACCGCAAGCGGTAAGTATAAATCTGAAAGCTATACAGGTCAGTTAATGGCTGGT  
As5-Lb TATCAAACCGCAAGCGGTAAGTATAAATCTGAAAGCTATACAGGTCAGTTAATGGCTGGT  
\*\*\*\*\*

Cal2 TATACCTATATGATGCCTGAGAATATTAACCTAACACCGCTTGCAGGGCTTAGATATTCG  
LSU TATACCTATATGATGCCTGAGAATATTAACCTAACACCGCTTGCAGGGCTTAGATATTCG  
LSU-Lb TATACCTATATGATGCCTGAGAATATTAACCTAACACCGCTTGCAGGGCTTAGATATTCG  
As5-Lb TATACCTATATGATGCCTGAGAATATTAACCTAACACCGCTTGCAGGGCTTAGATATTCG  
\*\*\*\*\*

Cal2 GCTATCAAAGATAAGGGCTATAAGGAACTGACTACTAACCAAACCTTATAGTTAAAGG  
LSU GCTATCAAAGATAAGGGCTATAAGGAACTGACTACTAACCAAACCTTATAGTTAAAGG  
LSU-Lb GCTATCAAAGATAAGGGCTATAAGGAACTGACTACTAACCAAACCTTATAGTTAAAGG  
As5-Lb GCTATCAAAGATAAGGGCTATAAGGAACTGACTACTAACCAAACCTTATAGTTAAAGG  
\*\*\*\*\*

Cal2 CAAGAACTATAATAGCTTCGATGGTTTACTCGGCGTAAAGTATCAAGTAATCAATGT  
LSU CAAGAACTATAATAGCTTCGATGGTTTACTCGGCGTAAAGTATCAAGTAATCAATGT  
LSU-Lb CAAGAACTATAATAGCTTCGATGGTTTACTCGGCGTAAAGTATCAAGTAATCAATGT  
As5-Lb CAAGAACTATAATAGCTTCGATGGTTTACTCGGCGTAAAGTATCAAGTAATCAATGT  
\*\*\*\*\*

Cal2 CAATGAAGAAGTAGTGCTAACACCTGAGCTTTACGCAATGGTTGATATGCATTCAAGAA  
LSU CAATGAAGAAGTAGTGCTAACACCTGAGCTTTACGCAATGGTTGATATGCATTCAAGAA  
LSU-Lb CAATGAAGAAGTAGTGCTAACACCTGAGCTTTACGCAATGGTTGATATGCATTCAAGAA  
As5-Lb CAATGAAGAAGTAGTGCTAACACCTGAGCTTTACGCAATGGTTGATATGCATTCAAGAA  
\*\*\*\*\*

Cal2 TAAAGTTCCGGCGATTGATGCAAGATTACAAGGTATGACTGCTCCTTACCACAGCTTT  
LSU TAAAGTTCCGGCGATTGATGCAAGATTACAAGGTATGACTGCTCCTTACCACAGCTTT  
LSU-Lb TAAAGTTCCGGCGATTGATGCAAGATTACAAGGTATGACTGCTCCTTACCACAGCTTT  
As5-Lb TAAAGTTCCGGCGATTGATGCAAGATTACAAGGTATGACTGCTCCTTACCACAGCTTT  
\*\*\*\*\*

Cal2 AAGCAAAGCAAAACAAGCTTTGATGTCGGCGTCGGTGTACTGCTAAGCACAAAATGATG  
LSU AAGCAAAGCAAAACAAGCTTTGATGTCGGCGTCGGTGTACTGCTAAGCACAAAATGATG  
LSU-Lb AAGCAAAGCAAAACAAGCTTTGATGTCGGCGTCGGTGTACTGCTAAGCACAAAATGATG  
As5-Lb AAGCAAAGCAAAACAAGCTTTGATGTCGGCGTCGGTGTACTGCTAAGCACAAAATGATG  
\*\*\*\*\*

Cal2 GAATACGGTATTAACCTACGATACAA  
LSU GAATACGGTATTAACCTACGATACAA  
LSU-Lb GAATACGGTATTAACCTACGATACAA  
As5-Lb GAATACGGTATTAACCTACGATACAA  
\*\*\*\*\*

### sca4 sequences

As3-Lb, *Rickettsia felis* clone As3 (GQ329878); AF1-Lb, *Rickettsia felis* strain AF1 (HM626232); AM1-Lb, *Rickettsia felis* strain AM1 (HM626231).

Genomic variability in *Rickettsia felis* strains; SUPPLEMENTARY MATERIAL

Cal2 ATGAGTAAAGATAGTGATAATCCTGGATATGAAAGTGGATATGAGTCAGACACCGAAG-A  
LSU -----ATGAAAGTGGATATGAGTCAGACACCGAAGAA  
LSU-lb -----ATGAAAGTGGATATGAGTCAGACACCGAAGAA  
As3-Lb -----  
AF1-Lb -----  
AM1-Lb -----

Cal2 AAAAAACAAGAGCAAGCTGTTCTGCTCAACCTATTAGTAGTACTGCAAATAAAGACGG  
LSU AAAAAACAAGAGCAAGCTGTTCTGCTCAACCTATTAGTAGTACTGCAAATAAAGACGG  
LSU-lb AAAAAACAAGAGCAAGCTGTTCTGCTCAACCTATTAGTAGTACTGCAAATAAAGACGG  
As3-Lb -----  
AF1-Lb -----  
AM1-Lb -----

Cal2 TAACCCCGATACAAGTGAGTTTGATCCTTTAGCAAATAAGGAATATACAGAAGAACAAAA  
LSU TAACCCCGATACAAGTGAGTTTGATCCTTTAGCAAATAAGGAATATACAGAAGAACAAAA  
LSU-lb TAACCCCGATACAAGTGAGTTTGATCCTTTAGCAAATAAGGAATATACAGAAGAACAAAA  
As3-Lb -----CAGAAGAACAAAA  
AF1-Lb -----  
AM1-Lb -----

Cal2 GCAAAAATTAGAACAGAACAAGAGATATTTTCTCAAACCTACACCACAAGAACTAGA  
LSU GCAAAAATTAGAACAGAACAAGAGATATTTTCTCAAACCTACACCACAAGAACTAGA  
LSU-lb GCAAAAATTAGAACAGAACAAGAGATATTTTCTCAAACCTACACCACAAGAACTAGA  
As3-Lb GCAAAAATTAGAACAGAACAAGAGATATTTTCTCAAACCTACACCACAAGAACTAGA  
AF1-Lb -----  
AM1-Lb -----

Cal2 AGCTGATGATGGTTTTAGCTTTACTCCTGCATCTTCTACTCAATCTACTCCTTCAATCAG  
LSU AGCTGATGATGGTTTTAGCTTTACTCCTGCATCTTCTACTCAATCTACTCCTTCAATCAG  
LSU-lb AGCTGATGATGGTTTTAGCTTTACTCCTGCATCTTCTACTCAATCTACTCCTTCAATCAG  
As3-Lb AGCTGATGATGGTTTTAGCTTTACTCCTGCATCTTCTACTCAATCTACTCCTTCAATCAG  
AF1-Lb -----  
AM1-Lb -----

Cal2 CAGCTTATCGGGCGGTATTTCTCTGACAGTCAGACATCAGACCCAATAACCAAGGCTGT  
LSU CAGCTTATCGGGCGGTATTTCTCTGACAGTCAGACATCAGACCCAATAACCAAGGCTGT  
LSU-lb CAGCTTATCGGGCGGTATTTCTCTGACAGTCAGACATCAGACCCAATAACCAAGGCTGT  
As3-Lb CAGCTTATCGGGCGGTATTTCTCTGACAGTCAGACATCAGACCCAATAACCAAGGCTGT  
AF1-Lb -----  
AM1-Lb -----

Cal2 AAGAGAAACAATTATACAACCACAAAAGATGAGATAGCAGAGCAAATATTTAAAAGACCT  
LSU AAGAGAAACAATTATACAACCACAAAAGATGAGATAGCAGAGCAAATATTTAAAAGACCT  
LSU-lb AAGAGAAACAATTATACAACCACAAAAGATGAGATAGCAGAGCAAATATTTAAAAGACCT  
As3-Lb AAGAGAAACAATTATACAACCACAAAAGATGAGATAGCAGAGCAAATATTTAAAAGACCT  
AF1-Lb -----  
AM1-Lb -----

Cal2 AGCAGCCCTTGACAGCCGTGATTTAGCTGAACAAAAAAGAAAAGAAATAGAAGAGGAAAA  
LSU AGCAGCCCTTGACAGCCGTGATTTAGCTGAACAAAAAAGAAAAGAAATAGAAGAGGAAAA  
LSU-lb AGCAGCCCTTGACAGCCGTGATTTAGCTGAACAAAAAAGAAAAGAAATAGAAGAGGAAAA  
As3-Lb AGCAGCCCTTGACAGCCGTGATTTAGCTGAACAAAAAAGAAAAGAAATAGAAGAGGAAAA  
AF1-Lb -----  
AM1-Lb -----

Cal2 AGATAAAACATTAAGTGCTTTTTTCGGTAATCCGGCTAATAGAGAAATTTATTGATAAGGC  
LSU AGATAAAACATTAAGTGCTTTTTTCGGTAATCCGGCTAATAGAGAAATTTATTGATAAGGC  
LSU-lb AGATAAAACATTAAGTGCTTTTTTCGGTAATCCGGCTAATAGAGAAATTTATTGATAAGGC  
As3-Lb AGATAAAACATTAAGTGCTTTTTTCGGTAATCCGGCTAATAGAGAAATTTATTGATAAGGC  
AF1-Lb -----  
AM1-Lb -----

Genomic variability in *Rickettsia felis* strains; SUPPLEMENTARY MATERIAL

Ca12 TTTAGAAAATCCTGAACTTAAAAAGAAATTAGAATCAATAGAAATAGCTGGCTATAAAAA  
LSU TTTAGAAAATCCTGAACTTAAAAAGAAATTAGAATCAATAGAAATAGCTGGCTATAAAAA  
LSU-lb TTTAGAAAATCCTGAACTTAAAAAGAAATTAGAATCAATAGAAATAGCTGGCTATAAAAA  
As3-Lb TTTAGAAAATCCTGAACTTAAAAAGAAATTAGAATCAATAGAAATAGCTGGCTATAAAAA  
AF1-Lb -----  
AM1-Lb -----

Ca12 TGTTCTCTCAACATATAGTGCCGCTAATGGATATCAGGGTGGATTTAAGCCCGTACAGTG  
LSU TGTTCTCTCAACATATAGTGCCGCTAATGGATATCAGGGTGGATTTAAGCCCGTACAGTG  
LSU-lb TGTTCTCTCAACATATAGTGCCGCTAATGGATATCAGGGTGGATTTAAGCCCGTACAGTG  
As3-Lb TGTTCTCTCAACATATAGTGCCGCTAATGGATATCAGGGTGGATTTAAGCCCGTACAGTG  
AF1-Lb -----  
AM1-Lb -----

Ca12 GGAAAACCAAATAAGTGCAAGCGATCTTAGAGCCACGGTAGTTAGAAATGATGCAGGCCGA  
LSU GGAAAACCAAATAAGTGCAAGCGATCTTAGAGCCACGGTAGTTAGAAATGATGCAGGCCGA  
LSU-lb GGAAAACCAAATAAGTGCAAGCGATCTTAGAGCCACGGTAGTTAGAAATGATGCAGGCCGA  
As3-Lb GGAAAACCAAATAAGTGCAAGCGATCTTAGAGCCACGGTAGTTAGAAATGATGCAGGCCGA  
AF1-Lb -----  
AM1-Lb -----

Ca12 TGAACCTGTACCTTAAATGAAACAACCTGTTAAAAC TAAGCCTTTTACTGTAGCTAAACA  
LSU TGAACCTGTACCTTAAATGAAACAACCTGTTAAAAC TAAGCCTTTTACTGTAGCTAAACA  
LSU-lb TGAACCTGTACCTTAAATGAAACAACCTGTTAAAAC TAAGCCTTTTACTGTAGCTAAACA  
As3-Lb TGAACCTGTACCTTAAATGAAACAACCTGTTAAAAC TAAGCCTTTTACTGTAGCTAAACA  
AF1-Lb -----  
AM1-Lb -----

Ca12 AGACGGTACTCAGGTTCAAATCAATTCATATAGAGAAATAGATTTTCTATAAAAACCTGA  
LSU AGACGGTACTCAGGTTCAAATCAATTCATATAGAGAAATAGATTTTCTATAAAAACCTGA  
LSU-lb AGACGGTACTCAGGTTCAAATCAATTCATATAGAGAAATAGATTTTCTATAAAAACCTGA  
As3-Lb AGACGGTACTCAGGTTCAAATCAATTCATATAGAGAAATAGATTTTCTATAAAAACCTGA  
AF1-Lb -----  
AM1-Lb -----

Ca12 TAAAGCCGATGGGTCAATGCATCTATCAATGGTAGCATTAAAAGCTGATGGCACAAAGCC  
LSU TAAAGCCGATGGGTCAATGCATCTATCAATGGTAGCATTAAAAGCTGATGGCACAAAGCC  
LSU-lb TAAAGCCGATGGGTCAATGCATCTATCAATGGTAGCATTAAAAGCTGATGGCACAAAGCC  
As3-Lb TAAAGCCGATGGGTCAATGCATCTATCAATGGTAGCATTAAAAGCTGATGGCACAAAGCC  
AF1-Lb -----  
AM1-Lb -----

Ca12 CTCTAAAGATAAAGCAGTATATTTCACTGCTCACTACGAAGAAGGACCAAACGGTAAACC  
LSU CTCTAAAGATAAAGCAGTATATTTCACTGCTCACTACGAAGAAGGACCAAACGGTAAACC  
LSU-lb CTCTAAAGATAAAGCAGTATATTTCACTGCTCACTACGAAGAAGGACCAAACGGTAAACC  
As3-Lb CTCTAAAGATAAAGCAGTATATTTCACTGCTCACTACGAAGAAGGACCAAACGGTAAACC  
AF1-Lb -----  
AM1-Lb -----

Ca12 TCAACTTAAAGAAATAAGCTCACC GAAACCTTTAAAATTTGCCGGAGACGGACCGGATGC  
LSU TCAACTTAAAGAAATAAGCTCACC GAAACCTTTAAAATTTGCCGGAGACGGACCGGATGC  
LSU-lb TCAACTTAAAGAAATAAGCTCACC GAAACCTTTAAAATTTGCCGGAGACGGACCGGATGC  
As3-Lb TCAACTTAAAGAAATAAGCTCACC GAAACCTTTAAAATTTGCCGGAGACGGACCGGATGC  
AF1-Lb -----  
AM1-Lb -----

Ca12 GGTAGCTTATATTGAGCATGGCGGAGAAATTTATACACTTGCCGGTAACACGGGTAATA  
LSU GGTAGCTTATATTGAGCATGGCGGAGAAATTTATACACTTGCCGGTAACACGGGTAATA  
LSU-lb GGTAGCTTATATTGAGCATGGCGGAGAAATTTATACACTTGCCGGTAACACGGGTAATA  
As3-Lb GGTAGCTTATATTGAGCATGGCGGAGAAATTTATACACTTGCCGGTAACACGGGTAATA  
AF1-Lb -----  
AM1-Lb -----

Genomic variability in *Rickettsia felis* strains; SUPPLEMENTARY MATERIAL

Cal2 TAAAGAAATGATGAGAGAGGTAGAACTAAACCAAGGGCAGAGCGTTGATTTATCACAAAC  
LSU TAAAGAAATGATGAGAGAGGTAGAACTAAACCAAGGGCAGAGCGTTGATTTATCACAAAC  
LSU-lb TAAAGAAATGATGAGAGAGGTAGAACTAAACCAAGGGCAGAGCGTTGATTTATCACAAAC  
As3-Lb TAAAGAAATGATGAGAGAGGTAGAACTAAACCAAGGGCAGAGCGTTGATTTATCACAAAC  
AF1-Lb -----  
AM1-Lb -----

Cal2 TATAGCTGAAGATTTAACAAAGGTACAAGGTCGATCTCAGGAAACACCACAACCAATAAT  
LSU TATAGCTGAAGATTTAACAAAGGTACAAGGTCGATCTCAGGAAACACCACAACCAATAAT  
LSU-lb TATAGCTGAAGATTTAACAAAGGTACAAGGTCGATCTCAGGAAACACCACAACCAATAAT  
As3-Lb TATAGCTGAAGATTTAACAAAGGTACAAGGTCGATCTCAGGAAACACCACAACCAATAAT  
AF1-Lb -----  
AM1-Lb -----

Cal2 AACTCCGAATCAAGAATTAAAATCATCTATTGAAACGCCTACCACTACCCAAGTACCGCC  
LSU AACTCCGAATCAAGAATTAAAATCATCTATTGAAACGCCTACCACTACCCAAGTACCGCC  
LSU-lb AACTCCGAATCAAGAATTAAAATCATCTATTGAAACGCCTACCACTACCCAAGTACCGCC  
As3-Lb AACTCCGAATCAAGAATTAAAATCATCTATTGAAACGCCTACCACTACCCAAGTACCGCC  
AF1-Lb -----  
AM1-Lb -----

Cal2 AATTACTCCTGCCAACCAACCACTGCAACCTGAGACTTCACAAATGCCACAGCCGCAACA  
LSU AATTACTCCTGCCAACCAACCACTGCAACCTGAGACTTCACAAATGCCACAGCCGCAACA  
LSU-lb AATTACTCCTGCCAACCAACCACTGCAACCTGAGACTTCACAAATGCCACAGCCGCAACA  
As3-Lb AATTACTCCTGCCAACCAACCACTGCAACCTGAGACTTCACAAATGCCACAGCCGCAACA  
AF1-Lb -----  
AM1-Lb -----

Cal2 AGTGAATCCAAACCTCCTTAATGCAGCTACGGCTTTATCAACCAGTATGCAAGATTTATT  
LSU AGTGAATCCAAACCTCCTTAATGCAGCTACGGCTTTATCAACCAGTATGCAAGATTTATT  
LSU-lb AGTGAATCCAAACCTCCTTAATGCAGCTACGGCTTTATCAACCAGTATGCAAGATTTATT  
As3-Lb AGTGAATCCAAACCTCCTTAATGCAGCTACGGCTTTATCAACCAGTATGCAAGATTTATT  
AF1-Lb -----AAACCTCCTTAATGCAGCTACGGCTTTATCAACCAGTATGCAAGATTTATT  
AM1-Lb -----TACGGCTTTATCAACCAGTATGCAAGATTTATT  
\*\*\*\*\*

Cal2 AAATTAATGTAATGCAGGTTTAAACAAAAGAAAAGACGGTAATAAACAAATGATTTAAT  
LSU AAATTAATGTAATGCAGGTTTAAACAAAAGAAAAGACGGTAATAAACAAATGATTTAAT  
LSU-lb AAATTAATGTAATGCAGGTTTAAACAAAAGAAAAGACGGTAATAAACAAATGATTTAAT  
As3-Lb AAATTAATGTAATGCAGGTTTAAACAAAAGAAAAGACGGTAATAAACAAATGATTTAAT  
AF1-Lb AAATTAATGTAATGCAGGTTTAAACAAAAGAAAAGACGGTAATAAACAAATGATTTAAT  
AM1-Lb AAATTAATGTAATGCAGGTTTAAACAAAAGAAAAGACGGTAATAAACAAATGATTTAAT  
\*\*\*\*\*

Cal2 TAACGAAGCAGCCACGGCAATCTTAATAATGAGAAAAGTGATATTGCTGAAAAGCAGGC  
LSU TAACGAAGCAGCCACGGCAATCTTAATAATGAGAAAAGTGATATTGCTGAAAAGCAGGC  
LSU-lb TAACGAAGCAGCCACGGCAATCTTAATAATGAGAAAAGTGATATTGCTGAAAAGCAGGC  
As3-Lb TAACGAAGCAGCCACGGCAATCTTAATAATGAGAAAAGTGATATTGCTGAAAAGCAGGC  
AF1-Lb TAACGAAGCAGCCACGGCAATCTTAATAATGAGAAAAGTGATATTGCTGAAAAGCAGGC  
AM1-Lb TAACGAAGCAGCCACGGCAATCTTAATAATGAGAAAAGTGATATTGCTGAAAAGCAGGC  
\*\*\*\*\*

Cal2 TAATATCATTTGCTTTAACTGAAAATACGGTCAATAATAACGACCTCACACCGGATACAAA  
LSU TAATATCATTTGCTTTAACTGAAAATACGGTCAATAATAACGACCTCACACCGGATACAAA  
LSU-lb TAATATCATTTGCTTTAACTGAAAATACGGTCAATAATAACGACCTCACACCGGATACAAA  
As3-Lb TAATATCATTTGCTTTAACTGAAAATACGGTCAATAATAACGACCTCACACCGGATACAAA  
AF1-Lb TAATATCATTTGCTTTAACTGAAAATACGGTCAATAATAACGACCTCACACCGGATACAAA  
AM1-Lb TAATATCATTTGCTTTAACTGAAAATACGGTCAATAATAACGACCTCACACCGGATACAAA  
\*\*\*\*\*

Cal2 AGTAGCTGGAGTAAATGCGGTATTAGAAACCATAAAAAATGATCAGAATACCCAGACCT  
LSU AGTAGCTGGAGTAAATGCGGTATTAGAAACCATAAAAAATGATCAGAATACCCAGACCT  
LSU-lb AGTAGCTGGAGTAAATGCGGTATTAGAAACCATAAAAAATGATCAGAATACCCAGACCT  
As3-Lb AGTAGCTGGAGTAAATGCGGTATTAGAAACCATAAAAAATGATCAGAATACCCAGACCT  
AF1-Lb AGTAGCTGGAGTAAATGCGGTATTAGAAACCATAAAAAATGATCAGAATACCCAGACCT  
AM1-Lb AGTAGCTGGAGTAAATGCGGTATTAGAAACCATAAAAAATGATCAGAATACCCAGACCT  
\*\*\*\*\*

Genomic variability in *Rickettsia felis* strains; SUPPLEMENTARY MATERIAL

Cal2 AGAAAAATCAAAAATGCTTGAAGCTACAGTAGCTATAGCTTTAAATTCAGAGAATCTTGA  
LSU AGAAAAATCAAAAATGCTTGAAGCTACAGTAGCTATAGCTTTAAATTCAGAGAATCTTGA  
LSU-lb AGAAAAATCAAAAATGCTTGAAGCTACAGTAGCTATAGCTTTAAATTCAGAGAATCTTGA  
As3-Lb AGAAAAATCAAAAATGCTTGAAGCTACAGTAGCTATAGCTTTAAATTCAGAGAATCTTGA  
AF1-Lb AGAAAAATCAAAAATGCTTGAAGCTACAGTAGCTATAGCTTTAAATTCAGAGAATCTTGA  
AM1-Lb AGAAAAATCAAAAATGCTTGAAGCTACAGTAGCTATAGCTTTAAATTCAGAGAATCTTGA  
\*\*\*\*\*

Cal2 ACCGAAGCAAAAACAGCAGATGTTAGAAAAGGCAGTAGATGTCGGTTTAAAGCTTAAAGA  
LSU ACCGAAGCAAAAACAGCAGATGTTAGAAAAGGCAGTAGATGTCGGTTTAAAGCTTAAAGA  
LSU-lb ACCGAAGCAAAAACAGCAGATGTTAGAAAAGGCAGTAGATGTCGGTTTAAAGCTTAAAGA  
As3-Lb ACCGAAGCAAAAACAGCAGATGTTAGAAAAGGCAGTAGATGTCGGTTTAAAGCTTAAAGA  
AF1-Lb ACCGAAGCAAAAACAGCAGATGTTAGAAAAGGCAGTAGATGTCGGTTTAAAGCTTAAAGA  
AM1-Lb ACCGAAGCAAAAACAGCAGATGTTAGAAAAGGCAGTAGATGTCGGTTTAAAGCTTAAAGA  
\*\*\*\*\*

Cal2 TGATGCAAGTAGAGTTACGGCAATTGACGGTATTACGGATGCTGTAATAAAAAAGTAACCT  
LSU TGATGCAAGTAGAGTTACGGCAATTGACGGTATTACGGATGCTGTAATAAAAAAGTAACCT  
LSU-lb TGATGCAAGTAGAGTTACGGCAATTGACGGTATTACGGATGCTGTAATAAAAAAGTAACCT  
As3-Lb TGATGCAAGTAGAGTTACGGCAATTGACGGTATTACGGATGCTGTAATAAAAAAGTAACCT  
AF1-Lb TGATGCAAGTAGAGTTACGGCAATTGACGGTATTACGGATGCTGTAATAAAAAAGTAACCT  
AM1-Lb TGATGCAAGTAGAGTTACGGCAATTGACGGTATTACGGATGCTGTAATAAAAAAGTAACCT  
\*\*\*\*\*

Cal2 TTCTACTGAAGATAAAGGGACAATGCTTATAGCAGTAGGTGATAAGGTTAATGCCTCTGA  
LSU TTCTACTGAAGATAAAGGGACAATGCTTATAGCAGTAGGTGATAAGGTTAATGCCTCTGA  
LSU-lb TTCTACTGAAGATAAAGGGACAATGCTTATAGCAGTAGGTGATAAGGTTAATGCCTCTGA  
As3-Lb TTCTACTGAAGATAAAGGGACAATGCTTATAGCAGTAGGTGATAAGGTTAATGCCTCTGA  
AF1-Lb TTCTACTGAAGATAAAGGGACAATGCTTATAGCAGTAGGTGATAAGGTTAATGCCTCTGA  
AM1-Lb TTCTACTGAAGATAAAGGGACAATGCTTATAGCAGTAGGTGATAAGGTTAATGCCTCTGA  
\*\*\*\*\*

Cal2 ATTAAGCAATGCGGAAAAACAAAATTTATTAGGTTCTGTATTAAGAAAGGTGTAGAAGC  
LSU ATTAAGCAATGCGGAAAAACAAAATTTATTAGGTTCTGTATTAAGAAAGGTGTAGAAGC  
LSU-lb ATTAAGCAATGCGGAAAAACAAAATTTATTAGGTTCTGTATTAAGAAAGGTGTAGAAGC  
As3-Lb ATTAAGCAATGCGGAAAAACAAAATTTATTAGGTTCTGTATTAAGAAAGGTGTAGAAGC  
AF1-Lb ATTAAGCAATGCGGAAAAACAAAATTTATTAGGTTCTGTATTAAGAAAGGTGTAGAAGC  
AM1-Lb ATTAAGCAATGCGGAAAAACAAAATTTATTAGGTTCTGTATTAAGAAAGGTGTAGAAGC  
\*\*\*\*\*

Cal2 CCAAGTTCTCAGTCCGGAACAACAACAAATTGATGCAGCAGAATTTAGATAAGATTACAGC  
LSU CCAAGTTCTCAGTCCGGAACAACAACAAATTGATGCAGCAGAATTTAGATAAGATTACAGC  
LSU-lb CCAAGTTCTCAGTCCGGAACAACAACAAATTGATGCAGCAGAATTTAGATAAGATTACAGC  
As3-Lb CCAAGTTCTCAGTCCGGAACAACAACAAATTGATGCAGCAGAATTTAGATAAGATTACAGC  
AF1-Lb CCAAGTTCTCAGTCCGGAACAACAACAAATTGATGCAGCAGAATTTAGATAAGATTACAGC  
AM1-Lb CCAAGTTCTCAGTCCGGAACAACAACAAATTGATGCAGCAGAATTTAGATAAGATTACAGC  
\*\*\*\*\*

Cal2 AGAACAAACTAAAAATGCCCAAATAACAGAGGTACAAGGTATTTTAGCAAACCTGCATT  
LSU AGAACAAACTAAAAATGCCCAAATAACAGAGGTACAAGGTATTTTAGCAAACCTGCATT  
LSU-lb AGAACAAACTAAAAATGCCCAAATAACAGAGGTACAAGGTATTTTAGCAAACCTGCATT  
As3-Lb AGAACAAACTAAAAATGCCCAAATAACAGAGGTACAAGGTATTTTAGCAAACCTGCATT  
AF1-Lb AGAACAAACTAAAAATGCCCAAATAACAGAGGTACAAGGTATTTTAGCAAACCTGCATT  
AM1-Lb AGAACAAACTAAAAATGCCCAAATAACAGAGGTACAAGGTATTTTAGCAAACCTGCATT  
\*\*\*\*\*

Cal2 TAATACTATCGCTAAAACTGAGGCAATACAAAATGTTACTACAAAGGTTTTAGATAGTCC  
LSU TAATACTATCGCTAAAACTGAGGCAATACAAAATGTTACTACAAAGGTTTTAGATAGTCC  
LSU-lb TAATACTATCGCTAAAACTGAGGCAATACAAAATGTTACTACAAAGGTTTTAGATAGTCC  
As3-Lb TAATACTATCGCTAAAACTGAGGCAATACAAAATGTTACTACAAAGGTTTTAGATAGTCC  
AF1-Lb TAATACTATCGCTAAAACTGAGGCAATACAAAATGTTACTACAAAGGTTTTAGATAGTCC  
AM1-Lb TAATACTATCGCTAAAACTGAGGCAATACAAAATGTTACTACAAAGGTTTTAGATAGTCC  
\*\*\*\*\*

Cal2 GATTAAGCAGAAATAAAAGGTGAAACGCTCGAAAGTATTACTAAGGTAGTTGCTGAGAG  
LSU GATTAAGCAGAAATAAAAGGTGAAACGCTCGAAAGTATTACTAAGGTAGTTGCTGAGAG  
LSU-lb GATTAAGCAGAAATAAAAGGTGAAACGCTCGAAAGTATTACTAAGGTAGTTGCTGAGAG  
As3-Lb GATTAAGCAGAAATAAAAGGTGAAACGCTCGAAAGTATTACTAAGGTAGTTGCTGAGAG  
AF1-Lb GATTAAGCAGAAATAAAAGGTGAAACGCTCGAAAGTATTACTAAGGTAGTTGCTGAGAG  
AM1-Lb GATTAAGCAGAAATAAAAGGTGAAACGCTCGAAAGTATTACTAAGGTAGTTGCTGAGAG  
\*\*\*\*\*

Genomic variability in *Rickettsia felis* strains; SUPPLEMENTARY MATERIAL

Ca12 TCCTTTGAACGGTCAAGATAAAGCAGACATTGTTAAAGGTATGGGAGAAGCTATAGCTAG  
LSU TCCTTTGAACGGTCAAGATAAAGCAGACATTGTTAAAGGTATGGGAGAAGCTATAGCTAG  
LSU-lb TCCTTTGAACGGTCAAGATAAAGCAGACATTGTTAAAGGTATGGGAGAAGCTATAGCTAG  
As3-Lb TCCTTTGAACGGTCAAGATA-----  
AF1-Lb TCCTTTGAACGGTC-----  
AM1-Lb TCCTTTGAACGGTCAAGA-----  
\*\*\*\*\*

Ca12 TCATAAACTATGGCACCTACAGAAAAATTTCTACTATAGAATCCGTAGAAAAAGGGT  
LSU TCATAAACTATGGCACCTACAGAAAAATTTCTACTATAGAATCCGTAGAAAAAGGGT  
LSU-lb TCATAAACTATGGCACCTACAGAAAAATTTCTACTATAGAATCCGTAGAAAAAGGGT  
As3-Lb -----  
AF1-Lb -----  
AM1-Lb -----

Ca12 GGCCGAAAGTATAACAGATTTGGAAGATAAAAAAGTTAATGACTAAAGGATTAGTAGAGGG  
LSU GGCCGAAAGTATAACAGATTTGGAAGATAAAAAAGTTAATGACTAAAGGATTAGTAGAGGG  
LSU-lb GGCCGAAAGTATAACAGATTTGGAAGATAAAAAAGTTAATGACTAAAGGATTAGTAGAGGG  
As3-Lb -----  
AF1-Lb -----  
AM1-Lb -----

Ca12 TATTTATGAAGGCAAAGCAAATCCTGAAATAACTTCTGAAAAGACTAAAGCTGTTTCTAG  
LSU TATTTATGAAGGCAAAGCAAATCCTGAAATAACTTCTGAAAAGACTAAAGCTGTTTCTAG  
LSU-lb TATTTATGAAGGCAAAGCAAATCCTGAAATAACTTCTGAAAAGACTAAAGCTGTTTCTAG  
As3-Lb -----  
AF1-Lb -----  
AM1-Lb -----

Ca12 AGGGATTGATAAGAGTACTGCTATACCGGAAGATAAACAAGCTCTTAAAGATGCAGCGAA  
LSU AGGGATTGATAAGAGTACTGCTATACCGGAAGATAAACAAGCTCTTAAAGATGCAGCGAA  
LSU-lb AGGGATTGATAAGAGTACTGCTATACCGGAAGATAAACAAGCTCTTAAAGATGCAGCGAA  
As3-Lb -----  
AF1-Lb -----  
AM1-Lb -----

Ca12 TGAGGCAGCTTTAGATAGAGAACTCAAAATTTAACTGAAGGGTTAAAAAGACAGAATTT  
LSU TGAGGCAGCTTTAGATAGAGAACTCAAAATTTAACTGAAGGGTTAAAAAGACAGAATTT  
LSU-lb TGAGGCAGCTTTAGATAGAGAACTCAAAATTTAACTGAAGGGTTAAAAAGACAGAATTT  
As3-Lb -----  
AF1-Lb -----  
AM1-Lb -----

Ca12 AGGAGAACCTAAGCCTCGTGATGATATATATAACAAAGCTCAAGATGTAGCGGATGCATT  
LSU AGGAGAACCTAAGCCTCGTGATGATATATATAACAAAGCTCAAGATGTAGCGGATGCATT  
LSU-lb AGGAGAACCTAAGCCTCGTGATGATATATATAACAAAGCTCAAGATGTAGCGGATGCATT  
As3-Lb -----  
AF1-Lb -----  
AM1-Lb -----

Ca12 -AAAAATGTTATTACGCCTGTTTTAGATGCTCATCCTGAAAAACGTGAAGTCTCAGAAAG  
LSU AAAAAATGTTATTACGCCTGTTTTAGATGCTCATCCTGA-----  
LSU-lb -AAAAATGTTATTACGCCTGTTTTAGATGCTCATCCTGAAAAACGTGAAGTCTC---AG  
As3-Lb -----  
AF1-Lb -----  
AM1-Lb -----

Ca12 AAGAAGAAGTTGTGAAAAAACTTCCAGTATATTAATGATATCTCTAAGCTTGCAATTG  
LSU -----  
LSU-lb AAGAAGAAGTTGTGAAAAAACTTCCAGTATATTAATGATATCTCTAAGCTTGCAATTG  
As3-Lb -----  
AF1-Lb -----  
AM1-Lb -----

Genomic variability in *Rickettsia felis* strains; SUPPLEMENTARY MATERIAL

Cal2 AGAAAGTCAATAATTTTCGTGCTATGCTCTCTCCAGATGGTAATCTTAAAACTCTTGAAG  
 LSU -----  
 LSU-1b AGAAAGTCAATAATTTTCGTGCTATGCTCTCTCCAGATGGTAATCTTAAAACTCTTGAAG  
 As3-Lb -----  
 AF1-Lb -----  
 AM1-Lb -----

Cal2 AAAAAAA-GCTGAATCAACAAAAAAGTAGATGAGCTGGTAAAGGAATTTGGTACTAAA  
 LSU -----  
 LSU-1b AAAAAAAAGCTGA-----  
 As3-Lb -----  
 AF1-Lb -----  
 AM1-Lb -----

Cal2 TCTTCTACTGAAGAACAGCAAAGTTTTATTAAAGCTAATTTAATTGATGATAAACTTTA  
 LSU -----  
 LSU-1b -----  
 As3-Lb -----  
 AF1-Lb -----  
 AM1-Lb -----

Cal2 TCTAAAGAGATACGTTTACAACTATAAATAAGTTATTACAAGAACAAGCACAAAAACGA  
 LSU -----  
 LSU-1b -----  
 As3-Lb -----  
 AF1-Lb -----  
 AM1-Lb -----

Cal2 GCAGAAGCAATTGAAAACCCTAATGTTAAAACGGAAGATGTAAGGGTAGTATCAGGAGTT  
 LSU -----  
 LSU-1b -----  
 As3-Lb -----  
 AF1-Lb -----  
 AM1-Lb -----

Cal2 AATATCAAAGATAATATAAAAATTATGGGAGCATTAATGAATGCAAGAGATAGCATTATT  
 LSU -----  
 LSU-1b -----  
 As3-Lb -----  
 AF1-Lb -----  
 AM1-Lb -----

Cal2 CAGTCGGAAAAATTTAAATAAATCAACACCTATTAAAAGAGAGTCTTCCTTTCCGCCACGC  
 LSU -----  
 LSU-1b -----  
 As3-Lb -----  
 AF1-Lb -----  
 AM1-Lb -----

Cal2 TAA  
 LSU ---  
 LSU-1b ---  
 As3-Lb ---  
 AF1-Lb ---  
 AM1-Lb ---

**sca5 sequences**

Ar3-Lb, *Rickettsia felis* clone Ar3 (GQ385243); As4-Lb, *Rickettsia felis* clone As4 (GQ329879); Te2-Lb, *Rickettsia felis* clone Te2 (GQ329875).



Genomic variability in *Rickettsia felis* strains; SUPPLEMENTARY MATERIAL

Cal2 -----  
LSU -----  
LSU-Lb -----  
Ar3-Lb ATAAAAATATAACATTTATTAAAACTTTATGAAAAACTATAGCGATGCTTGTAATTATA  
As4-Lb -----  
Te2-Lb -----

Cal2 -----  
LSU -----  
LSU-Lb -----  
Ar3-Lb TACAATATATAGTATGCTCAGCTCGTAGTTTAGAACTATTGTAACAAAATATTAGGTTA  
As4-Lb -----  
Te2-Lb -----

Cal2 -----  
LSU -----  
LSU-Lb -----  
Ar3-Lb TTTCTTATCAAATGCGGGATATATTGACTTGTGTTTGATAAGTTGTTTTAATACTAGG  
As4-Lb -----  
Te2-Lb -----

Cal2 -----ATGGCTCAAAAACCAAATTTTCTAA  
LSU -----ATGGCTCAAAAACCAAATTTTCTAA  
LSU-Lb -----ATGGCTCAAAAACCAAATTTTCTAA  
Ar3-Lb TACTAAATTTTAACTTAAATATAGGAAAAAAATATGGCTCAAAAACCAAATTTTCTAA  
As4-Lb -----ATGGCTCAAAAACCAAATTTTCTAA  
Te2-Lb -----

Cal2 AAAAAATTAATTTCCGCAGGATTGGTAACTGCTTCTACAGCTACCATAGTAGCCGGCTTCG  
LSU AAAAAATTAATTTCCGCAGGATTGGTAACTGCTTCTACAGCTACCATAGTAGCCGGCTTCG  
LSU-Lb AAAAAATTAATTTCCGCAGGATTGGTAACTGCTTCTACAGCTACCATAGTAGCCGGCTTCG  
Ar3-Lb AAAAAATTAATTTCCGCAGGATTGGTAACTGCTTCTACAGCTACCATAGTAGCCGGCTTCG  
As4-Lb AAAAAATTAATTTCCGCAGGATTGGTAACTGCTTCTACAGCTACCATAGTAGCCGGCTTCG  
Te2-Lb -----CCGCAGGATTGGTAACTGCTTCTACAGCTACCATAGTAGCCGGCTTCG  
\*\*\*\*\*

Cal2 CAGGCTCAGCTATGGGTGCTGTACACAGCAGAATAGAACAACAGTCGGAGCTGTACAA  
LSU CAGGCTCAGCTATGGGTGCTGTACACAGCAGAATAGAACAACAGTCGGAGCTGTACAA  
LSU-Lb CAGGCTCAGCTATGGGTGCTGTACACAGCAGAATAGAACAACAGTCGGAGCTGTACAA  
Ar3-Lb CAGGCTCAGCTATGGGTGCTGTACACAGCAGAATAGAACAACAGTCGGAGCTGTACAA  
As4-Lb CAGGCTCAGCTATGGGTGCTGTACACAGCAGAATAGAACAACAGTCGGAGCTGTACAA  
Te2-Lb CAGGCTCAGCTATGGGTGCTGTACACAGCAGAATAGAACAACAGTCGGAGCTGTACAA  
\*\*\*\*\*

Cal2 CTGTTGACGGTGCGGGATTTGACCAAACCTGCCGCTCCTGCAAATCTTGCAAGTGTCTCAA  
LSU CTGTTGACGGTGCGGGATTTGACCAAACCTGCCGCTCCTGCAAATCTTGCAAGTGTCTCAA  
LSU-Lb CTGTTGACGGTGCGGGATTTGACCAAACCTGCCGCTCCTGCAAATCTTGCAAGTGTCTCAA  
Ar3-Lb CTGTTGACGGTGCGGGATTTGACCAAACCTGCCGCTCCTGCAAATCTTGCAAGTGTCTCAA  
As4-Lb CTGTTGACGGTGCGGGATTTGACCAAACCTGCCGCTCCTGCAAATCTTGCAAGTGTCTCAA  
Te2-Lb CTGTTGACGGTGCGGGATTTGACCAAACCTGCCGCTCCTGCAAATCTTGCAAGTGTCTCAA  
\*\*\*\*\*

Cal2 ATGCAGTTATTACGGCTAATGCTAATAATGGTATTAATTTTAACTCCAGCAGGTAGTT  
LSU ATGCAGTTATTACGGCTAATGCTAATAATGGTATTAATTTTAACTCCAGCAGGTAGTT  
LSU-Lb ATGCAGTTATTACGGCTAATGCTAATAATGGTATTAATTTTAACTCCAGCAGGTAGTT  
Ar3-Lb ATGCAGTTATTACGGCTAATGCTAATAATGGTATTAATTTTAACTCCAGCAGGTAGTT  
As4-Lb ATGCAGTTATTACGGCTAATGCTAATAATGGTATTAATTTTAACTCCAGCAGGTAGTT  
Te2-Lb ATGCAGTTATTACGGCTAATGCTAATAATGGTATTAATTTTAACTCCAGCAGGTAGTT  
\*\*\*\*\*

Cal2 TTAACGGTTTGTTTTTAGATACTGCAAACAATTTAGCAGCGACAGTTAGTGAAGATACTA  
LSU TTAACGGTTTGTTTTTAGATACTGCAAACAATTTAGCAGCGACAGTTAGTGAAGATACTA  
LSU-Lb TTAACGGTTTGTTTTTAGATACTGCAAACAATTTAGCAGCGACAGTTAGTGAAGATACTA  
Ar3-Lb TTAACGGTTTGTTTTTAGATACTGCAAACAATTTAGCAGCGACAGTTAGTGAAGATACTA  
As4-Lb TTAACGGTTTGTTTTTAGATACTGCAAACAATTTAGCAGCGACAGTTAGTGAAGATACTA  
Te2-Lb TTAACGGTTTGTTTTTAGATACTGCAAACAATTTAGCAGCGACAGTTAGTGAAGATACTA  
\*\*\*\*\*

Genomic variability in *Rickettsia felis* strains; SUPPLEMENTARY MATERIAL

Cal2 CTTTAGGATTTATCACAATGCTGCTAATAACGGTAACTTCTTTAATTTTACTCTTGGTG  
LSU CTTTAGGATTTATCACAATGCTGCTAATAACGGTAACTTCTTTAATTTTACTCTTGGTG  
LSU-Lb CTTTAGGATTTATCACAATGCTGCTAATAACGGTAACTTCTTTAATTTTACTCTTGGTG  
Ar3-Lb CTTTAGGATTTATCACAATGCTGCTAATAACGGTAACTTCTTTAATTTTACTCTTGGTG  
As4-Lb CTTTAGGATTTATCACAATGCTGCTAATAACGGTAACTTCTTTAATTTTACTCTTGGTG  
Te2-Lb CTTTAGGATTTATCACAATGCTGCTAATAACGGTAACTTCTTTAATTTTACTCTTGGTG  
\*\*\*\*\*

Cal2 CCGGTAAAACCTTACCATAACAGGACAAGGTATTACTGCTGGACAAGCTGCTGTACAA  
LSU CCGGTAAAACCTTACCATAACAGGACAAGGTATTACTGCTGGACAAGCTGCTGTACAA  
LSU-Lb CCGGTAAAACCTTACCATAACAGGACAAGGTATTACTGCTGGACAAGCTGCTGTACAA  
Ar3-Lb CCGGTAAAACCTTACCATAACAGGACAAGGTATTACTGCTGGACAAGCTGCTGTACAA  
As4-Lb CCGGTAAAACCTTACCATAACAGGACAAGGTATTACTGCTGGACAAGCTGCTGTACAA  
Te2-Lb CCGGTAAAACCTTACCATAACAGGACAAGGTATTACTGCTGGACAAGCTGCTGTACAA  
\*\*\*\*\*

Cal2 AAAATGCTCAAAATGCTGTTGCACAAGTTAATGGTGGTAATGCTATTGCCAATAATGATC  
LSU AAAATGCTCAAAATGCTGTTGCACAAGTTAATGGTGGTAATGCTATTGCCAATAATGATC  
LSU-Lb AAAATGCTCAAAATGCTGTTGCACAAGTTAATGGTGGTAATGCTATTGCCAATAATGATC  
Ar3-Lb AAAATGCTCAAAATGCTGTTGCACAAGTTAATGGTGGTAATGCTATTGCCAATAATGATC  
As4-Lb AAAATGCTCAAAATGCTGTTGCACAAGTTAATGGTGGTAATGCTATTGCCAATAATGATC  
Te2-Lb AAAATGCTCAAAATGCTGTTGCACAAGTTAATGGTGGTAATGCTATTGCCAATAATGATC  
\*\*\*\*\*

Cal2 TTAGCGGTGTAGGAACAATAGATTTTGGTGTGCGCCTTCTACATTAGTATTTAATTTAA  
LSU TTAGCGGTGTAGGAACAATAGATTTTGGTGTGCGCCTTCTACATTAGTATTTAATTTAA  
LSU-Lb TTAGCGGTGTAGGAACAATAGATTTTGGTGTGCGCCTTCTACATTAGTATTTAATTTAA  
Ar3-Lb TTAGCGGTGTAGGAACAATAGATTTTGGTGTGCGCCTTCTACATTAGTATTTAATTTAA  
As4-Lb TTAGCGGTGTAGGAACAATAGATTTTGGTGTGCGCCTTCTACATTAGTATTTAATTTAA  
Te2-Lb TTAGCGGTGTAGGAACAATAGATTTTGGTGTGCGCCTTCTACATTAGTATTTAATTTAA  
\*\*\*\*\*

Cal2 CAAACCTACAACCTCAAAAGAGCTCCTTATACTTGGAGATAATGCTGTAATAGCTAATG  
LSU CAAACCTACAACCTCAAAAGAGCTCCTTATACTTGGAGATAATGCTGTAATAGCTAATG  
LSU-Lb CAAACCTACAACCTCAAAAGAGCTCCTTATACTTGGAGATAATGCTGTAATAGCTAATG  
Ar3-Lb CAAACCTACAACCTCAAAAGAGCTCCTTATACTTGGAGATAATGCTGTAATAGCTAATG  
As4-Lb CAAACCTACAACCTCAAAAGAGCTCCTTATACTTGGAGATAATGCTGTAATAGCTAATG  
Te2-Lb CAAACCTACAACCTCAAAAGAGCTCCTTATACTTGGAGATAATGCTGTAATAGCTAATG  
\*\*\*\*\*

Cal2 GTGCTAACGGTACATTAATGTTACTAATGGATTTATTCAAGTTTCAGATGAAACTTTTG  
LSU GTGCTAACGGTACATTAATGTTACTAATGGATTTATTCAAGTTTCAGATGAAACTTTTG  
LSU-Lb GTGCTAACGGTACATTAATGTTACTAATGGATTTATTCAAGTTTCAGATGAAACTTTTG  
Ar3-Lb GTGCTAACGGTACATTAATGTTACTAATGGATTTATTCAAGTTTCAGATGAAACTTTTG  
As4-Lb GTGCTAACGGTACATTAATGTTACTAATGGATTTATTCAAGTTTCAGATGAAACTTTTG  
Te2-Lb GTGCTAACGGTACATTAATGTTACTAATGGATTTATTCAAGTTTCAGATGAAACTTTTG  
\*\*\*\*\*

Cal2 CTACTATTAAGACAATTAATATCGGTGACGGTCAAGGTTTCATTTTCAATACTGATGCTA  
LSU CTACTATTAAGACAATTAATATCGGTGACGGTCAAGGTTTCATTTTCAATACTGATGCTA  
LSU-Lb CTACTATTAAGACAATTAATATCGGTGACGGTCAAGGTTTCATTTTCAATACTGATGCTA  
Ar3-Lb CTACTATTAAGACAATTAATATCGGTGACGGTCAAGGTTTCATTTTCAATACTGATGCTA  
As4-Lb CTACTATTAAGACAATTAATATCGGTGACGGTCAAGGTTTCATTTTCAATACTGATGCTA  
Te2-Lb CTACTATTAAGACAATTAATATCGGTGACGGTCAAGGTTTCATTTTCAATACTGATGCTA  
\*\*\*\*\*

Cal2 CTGCCGGTAATGCTTTAAATTTACAAGTAGGTGGTGTACTATTAATTTTAAACGGAACAG  
LSU CTGCCGGTAATGCTTTAAATTTACAAGTAGGTGGTGTACTATTAATTTTAAACGGAACAG  
LSU-Lb CTGCCGGTAATGCTTTAAATTTACAAGTAGGTGGTGTACTATTAATTTTAAACGGAACAG  
Ar3-Lb CTGCCGGTAATGCTTTAAATTTACAAGTAGGTGGTGTACTATTAATTTTAAACGGAACAG  
As4-Lb CTGCCGGTAATGCTTTAAATTTACAAGTAGGTGGTGTACTATTAATTTTAAACGGAACAG  
Te2-Lb CTGCCGGTAATGCTTTAAATTTACAAGTAGGTGGTGTACTATTAATTTTAAACGGAACAG  
\*\*\*\*\*

Cal2 ACGGTACCGGTAGATTAGTATTTAAGTAATGCTGCTGGTGGCGGTGCTACCGACTTTA  
LSU ACGGTACCGGTAGATTAGTATTTAAGTAATGCTGCTGGTGGCGGTGCTACCGACTTTA  
LSU-Lb ACGGTACCGGTAGATTAGTATTTAAGTAATGCTGCTGGTGGCGGTGCTACCGACTTTA  
Ar3-Lb ACGGTACCGGTAGATTAGTATTTAAGTAATGCTGCTGGTGGCGGTGCTACCGACTTTA  
As4-Lb ACGGTACCGGTAGATTAGTATTTAAGTAATGCTGCTGGTGGCGGTGCTACCGACTTTA  
Te2-Lb ACGGTACCGGTAGATTAGTATTTAAGTAATGCTGCTGGTGGCGGTGCTACCGACTTTA  
\*\*\*\*\*

Genomic variability in *Rickettsia felis* strains; SUPPLEMENTARY MATERIAL

Cal2 ATGTTACAGGAAGTTTAGGCGGTAATCTAAAAGGTATTATTGAATTTAATACTACTGCAG  
LSU ATGTTACAGGAAGTTTAGGCGGTAATCTAAAAGGTATTATTGAATTTAATACTACTGCAG  
LSU-Lb ATGTTACAGGAAGTTTAGGCGGTAATCTAAAAGGTATTATTGAATTTAATACTACTGCAG  
Ar3-Lb ATGTTACAGGAAGTTTAGGCGGTAATCTAAAAGGTATTATTGAATTTAATACTACTGCAG  
As4-Lb ATGTTACAGGAAGTTTAGGCGGTAATCTAAAAGGTATTATTGAATTTAATACTACTGCAG  
Te2-Lb ATGTTACAGGAAGTTTAGGCGGTAATCTAAAAGG-----  
\*\*\*\*\*

Cal2 TAGCAGGTCAACTTATAGCTAATGCAGGTCCGCTAATGCAGTAATAGGTACCAATAACG  
LSU TAGCAGGTCAACTTATAGCTAATGCAGGTCCGCTAATGCAGTAATAGGTACCAATAACG  
LSU-Lb TAGCAGGTCAACTTATAGCTAATGCAGGTCCGCTAATGCAGTAATAGGTACCAATAACG  
Ar3-Lb TAGCAGGTCAACTTATAGCTAATGCAGGTCCGCTAATGCAGTAATAGGTACCAATAACG  
As4-Lb TAGCAGGTCAACTTATAGCTAATGCAGGTCCGCTAATGCAGTAATAGGTACCAATAACG  
Te2-Lb -----

Cal2 GAGCAGGTAGAGCTGCAGGATTTGTTGTTAGCGTAGCTAACGGTAATGCAGCAACAGTCG  
LSU GAGCAGGTAGAGCTGCAGGATTTGTTGTTAGCGTAGCTAACGGTAATGCAGCAACAGTCG  
LSU-Lb GAGCAGGTAGAGCTGCAGGATTTGTTGTTAGCGTAGCTAACGGTAATGCAGCAACAGTCG  
Ar3-Lb GAGCAGGTAGAGCTGCAGGATTTGTTGTTAGCGTAGCTAACGGTAATGCAGCAACAGTCG  
As4-Lb GAGCAGGTAGAGCTGCAGGATTTGTTGTTAGCGTAGCTAACGGTAATGCAGCAACAGTCG  
Te2-Lb -----

Cal2 CTGGACAAGTGTATGCTAAAGACATGGTTATACAAAGTACTAATGCAGGCGGACAAGTAA  
LSU CTGGACAAGTGTATGCTAAAGACATGGTTATACAAAGTACTAATGCAGGCGGACAAGTAA  
LSU-Lb CTGGACAAGTGTATGCTAAAGACATGGTTATACAAAGTACTAATGCAGGCGGACAAGTAA  
Ar3-Lb CTGGACAAGTGTATGCTAAAGACATGGTTATACAAAGTACTAATGCAGGCGGACAAGTAA  
As4-Lb CTGGACAAGTGTATGCTAAAGACATGGTTATACAAAGTACTAATGCAGGCGGACAAGTAA  
Te2-Lb -----

Cal2 ATTTTGGACACATAGTTGATGTTGGTACGGACGGTACTACTGCATTTAAAACAGCAGCTA  
LSU ATTTTGGACACATAGTTGATGTTGGTACGGACGGTACTACTGCATTTAAAACAGCAGCTA  
LSU-Lb ATTTTGGACACATAGTTGATGTTGGTACGGACGGTACTACTGCATTTAAAACAGCAGCTA  
Ar3-Lb ATTTTGGACACATAGTTGATGTTGGTACGGACGGTACTACTGCATTTAAAACAGCAGCTA  
As4-Lb ATTTTGGACACATAGTTGATGTTGGTACGGACGGTACTACTGCATTTAAAACAGCAGCTA  
Te2-Lb -----

Cal2 CTACAGTTGCAATAAACCAGAACTCGAACTTTGGTGCCGTTGATTTTCGTAATACTGCAT  
LSU CTACAGTTGCAATAAACCAGAACTCGAACTTTGGTGCCGTTGATTTTCGTAATACTGCAT  
LSU-Lb CTACAGTTGCAATAAACCAGAACTCGAACTTTGGTGCCGTTGATTTTCGTAATACTGCAT  
Ar3-Lb CTACAGTTGCAATAAACCAGAACTCGAACTTTGGTGCCGTTGATTTTCGTAATACTGCAT  
As4-Lb CTACAGTTGCAATAAACCAGAACTCGAACTTTGGTGCCGTTGATTTTCGTAATACTGCAT  
Te2-Lb -----

Cal2 CACAAATTACAGTTCCGATACTAAGGTTCTTACAGGTAAC TTCACAGGTGATGCTAGCA  
LSU CACAAATTACAGTTCCGATACTAAGGTTCTTACAGGTAAC TTCACAGGTGATGCTAGCA  
LSU-Lb CACAAATTACAGTTCCGATACTAAGGTTCTTACAGGTAAC TTCACAGGTGATGCTAGCA  
Ar3-Lb CACAAATTACAGTTCCGATACTAAGGTTCTTACAGGTAAC TTCACAGGTGATGCTAGCA  
As4-Lb CACAAATTACAGTTCCGATACTAAGGTTCTTACAGGTAAC TTCACAGGTGATGCTAGCA  
Te2-Lb -----

Cal2 ATAACGGTAATACTGCGGGTGTGATAACTTTTGCTGCTAACGGTACTTTAGCAAGCGGTA  
LSU ATAACGGTAATACTGCGGGTGTGATAACTTTTGCTGCTAACGGTACTTTAGCAAGCGGTA  
LSU-Lb ATAACGGTAATACTGCGGGTGTGATAACTTTTGCTGCTAACGGTACTTTAGCAAGCGGTA  
Ar3-Lb ATAACGGTAATACTGCGGGTGTGATAACTTTTGCTGCTAACGGTACTTTAGCAAGCGGTA  
As4-Lb ATAACGGTAATACTGCGGGTGTGATAACTTTTGCTGCTAACGGTACTTTAGCAAGCGGTA  
Te2-Lb -----

Cal2 ATGCTGATGCAAAATGTTGCGGTAACAAATAAAATTACAGCAATCGAAGCAGCAGGTGTCG  
LSU ATGCTGATGCAAAATGTTGCGGTAACAAATAAAATTACAGCAATCGAAGCAGCAGGTGTCG  
LSU-Lb ATGCTGATGCAAAATGTTGCGGTAACAAATAAAATTACAGCAATCGAAGCAGCAGGTGTCG  
Ar3-Lb ATGCTGATGCAAAATGTTGCGGTAACAAATAAAATTACAGCAATCGAAGCAGCAGGTGTCG  
As4-Lb ATGCTGATGCAAAATGTTGCGGTAACAAATAAAATTACAGCAATCGAAGCAGCAGGTGTCG  
Te2-Lb -----

Genomic variability in *Rickettsia felis* strains; SUPPLEMENTARY MATERIAL

Cal2 GAGTTGTCCAATTATCAGGAACACATACTGCTGAATTACGTTTAGGAAACGCTGGTTCTC  
LSU GAGTTGTCCAATTATCAGGAACACATACTGCTGAATTACGTTTAGGAAACGCTGGTTCTC  
LSU-Lb GAGTTGTCCAATTATCAGGAACACATACTGCTGAATTACGTTTAGGAAACGCTGGTTCTC  
Ar3-Lb GAGTTGTCCAATTATCAGGAACACATACTGCTGAATTACGTTTAGGAAACGCTGGTTCTC  
As4-Lb GAGTTGTCCAATTATCAGGAACACATACTGCTGAATTACGTTTAGGAAACGCTGGTTCTC  
Te2-Lb -----

Cal2 AGTTTAAAGCTTGTCTGATGGTACAATTATCAATGGTAACGTTAACCAAACGTTCTTGTCTG  
LSU AGTTTAAAGCTTGTCTGATGGTACAATTATCAATGGTAACGTTAACCAAACGTTCTTGTCTG  
LSU-Lb AGTTTAAAGCTTGTCTGATGGTACAATTATCAATGGTAACGTTAACCAAACGTTCTTGTCTG  
Ar3-Lb AGTTTAAAGCTTGTCTGATGGTACAATTATCAATGGTAACGTTAACCAAACGTTCTTGTCTG  
As4-Lb AGTTTAAAGCTTGTCTGATGGTACAATTATCAATGGTAACGTTAACCAAACGTTCTTGTCTG  
Te2-Lb -----

Cal2 GTAATGCTGCTCTTGCAAATGGTGTATTTCAGTTAGATGGAAGTGTACAATTACCGGTG  
LSU GTAATGCTGCTCTTGCAAATGGTGTATTTCAGTTAGATGGAAGTGTACAATTACCGGTG  
LSU-Lb GTAATGCTGCTCTTGCAAATGGTGTATTTCAGTTAGATGGAAGTGTACAATTACCGGTG  
Ar3-Lb GTAATGCTGCTCTTGCAAATGGTGTATTTCAGTTAGATGGAAGTGTACAATTACCGGTG  
As4-Lb GTAATGCTGCTCTTGCAAATGGTGTATTTCAGTTAGATGGAAGTGTACAATTACCGGTG  
Te2-Lb -----

Cal2 ATATAGGTAACGGTGTCTGGTAATGCTGCTCCGATACAAGGGATTACTTTAGCTAACGATG  
LSU ATATAGGTAACGGTGTCTGGTAATGCTGCTCCGATACAAGGGATTACTTTAGCTAACGATG  
LSU-Lb ATATAGGTAACGGTGTCTGGTAATGCTGCTCCGATACAAGGGATTACTTTAGCTAACGATG  
Ar3-Lb ATATAGGTAACGGTGTCTGGTAATGCTGCTCCGATACAAGGGATTACTTTAGCTAACGATG  
As4-Lb ATATAGGTAACGGTGTCTGGTAATGCTGCTCCGATACAAGGGATTACTTTAGCTAACGATG  
Te2-Lb -----

Cal2 CTTCAAAAACATTAACACTTGGCGGAGCAAATATTAATCGGTGCTAATGCCGGTGGAAACAA  
LSU CTTCAAAAACATTAACACTTGGCGGAGCAAATATTAATCGGTGCTAATGCCGGTGGAAACAA  
LSU-Lb CTTCAAAAACATTAACACTTGGCGGAGCAAATATTAATCGGTGCTAATGCCGGTGGAAACAA  
Ar3-Lb CTTCAAAAACATTAACACTTGGCGGAGCAAATATTAATCGGTGCTAATGCCGGTGGAAACAA  
As4-Lb CTTCAAAAACATTAACACTTGGCGGAGCAAATATTAATCGGTGCTAATGCCGGTGGAAACAA  
Te2-Lb -----

Cal2 TTGATTTCCAAGCTAACGGAGGTACTGTTAAGTTAACAAGTACTCAAATAATATTTTGTAG  
LSU TTGATTTCCAAGCTAACGGAGGTACTGTTAAGTTAACAAGTACTCAAATAATATTTTGTAG  
LSU-Lb TTGATTTCCAAGCTAACGGAGGTACTGTTAAGTTAACAAGTACTCAAATAATATTTTGTAG  
Ar3-Lb TTGATTTCCAAGCTAACGGAGGTACTGTTAAGTTAACAAGTACTCAAATAATATTTTGTAG  
As4-Lb TTGATTTCCAAGCTAACGGAGGTACTGTTAAGTTAACAAGTACTCAAATAATATTTTGTAG  
Te2-Lb -----

Cal2 TTGATTTTGATTTAGCTATCACTACTGATAAAAACAGGTGTTGTTGATGCAAGTAGCCTAA  
LSU TTGATTTTGATTTAGCTATCACTACTGATAAAAACAGGTGTTGTTGATGCAAGTAGCCTAA  
LSU-Lb TTGATTTTGATTTAGCTATCACTACTGATAAAAACAGGTGTTGTTGATGCAAGTAGCCTAA  
Ar3-Lb TTGATTTTGATTTAGCTATCACTACTGATAAAAACAGGTGTTGTTGATGCAAGTAGCCTAA  
As4-Lb TTGATTTTGATTTAGCTATCACTACTGATAAAAACAGGTGTTGTTGATGCAAGTAGCCTAA  
Te2-Lb -----

Cal2 TAAATGCTCAAACCTTAACTATTAGTGGTAATATTGGTACTATTGCAGCTAATAATAAAAA  
LSU TAAATGCTCAAACCTTAACTATTAGTGGTAATATTGGTACTATTGCAGCTAATAATAAAAA  
LSU-Lb TAAATGCTCAAACCTTAACTATTAGTGGTAATATTGGTACTATTGCAGCTAATAATAAAAA  
Ar3-Lb TAAATGCTCAAACCTTAACTATTAGTGGTAATATTGGTACTATTGCAGCTAATAATAAAAA  
As4-Lb TAAATGCTCAAACCTTAACTATTAGTGGTAATATTGGTACTATTGCAGCTAATAATAAAAA  
Te2-Lb -----

Cal2 CTCTTGGACAATTTAATATCGGCTCAAGTAAAACAGCTTTAAATAGTGGTGTGTTGCTA  
LSU CTCTTGGACAATTTAATATCGGCTCAAGTAAAACAGCTTTAAATAGTGGTGTGTTGCTA  
LSU-Lb CTCTTGGACAATTTAATATCGGCTCAAGTAAAACAGCTTTAAATAGTGGTGTGTTGCTA  
Ar3-Lb CTCTTGGACAATTTAATATCGGCTCAAGTAAAACAGCTTTAAATAGTGGTGTGTTGCTA  
As4-Lb CTCTTGGACAATTTAATATCGGCTCAAGTAAAACAGCTTTAAATAGTGGTGTGTTGCTA  
Te2-Lb -----

Genomic variability in *Rickettsia felis* strains; SUPPLEMENTARY MATERIAL

Cal2 TTAATGAGTTAGTTATTGGAAATAACGGTTCAGTACAACCTTGCTCACAATACTTATTTAA  
LSU TTAATGAGTTAGTTATTGGAAATAACGGTTCAGTACAACCTTGCTCACAATACTTATTTAA  
LSU-Lb TTAATGAGTTAGTTATTGGAAATAACGGTTCAGTACAACCTTGCTCACAATACTTATTTAA  
Ar3-Lb TTAATGAGTTAGTTATTGGAAATAACGGTTCAGTACAACCTTGCTCACAATACTTATTTAA  
As4-Lb TTAATGAGTTAGTTATTGGAAATAACGGTTCAGTACAACCTTGCTCACAATACTTATTTAA  
Te2-Lb -----

Cal2 TAACAAAACTACAAATGCTGCAAATCAAGGTAAAAATAATTTAATCCTGTTGTAATG  
LSU TAACAAAACTACAAATGCTGCAAATCAAGGTAAAAATAATTTAATCCTGTTGTAATG  
LSU-Lb TAACAAAACTACAAATGCTGCAAATCAAGGTAAAAATAATTTAATCCTGTTGTAATG  
Ar3-Lb TAACAAAACTACAAATGCTGCAAATCAAGGTAAAAATAATTTAATCCTGTTGTAATG  
As4-Lb TAACAAAACTACAAATGCTGCAAATCAAGGTAAAAATAATTTAATCCTGTTGTAATG  
Te2-Lb -----

Cal2 ATAATACAACCTTTCGAGCTGGCACAATTTAGGTAGTGAAGCAAATCCTCTTGCTGAGA  
LSU ATAATACAACCTTTCGAGCTGGCACAATTTAGGTAGTGAAGCAAATCCTCTTGCTGAGA  
LSU-Lb ATAATACAACCTTTCGAGCTGGCACAATTTAGGTAGTGAAGCAAATCCTCTTGCTGAGA  
Ar3-Lb ATAATACAACCTTTCGAGCTGGCACAATTTAGGTAGTGAAGCAAATCCTCTTGCTGAGA  
As4-Lb ATAATACAACCTTTCGAGCTGGCACAATTTAGGTAGTGAAGCAAATCCTCTTGCTGAGA  
Te2-Lb -----

Cal2 TTAATTTTGGTCTAAAGGAGTTAATGGTGACACTATATTAATGTTGGTCAAGGCCTAA  
LSU TTAATTTTGGTCTAAAGGAGTTAATGGTGACACTATATTAATGTTGGTCAAGGCCTAA  
LSU-Lb TTAATTTTGGTCTAAAGGAGTTAATGGTGACACTATATTAATGTTGGTCAAGGCCTAA  
Ar3-Lb TTAATTTTGGTCTAAAGGAGTTAATGGTGACACTATATTAATGTTGGTCAAGGCCTAA  
As4-Lb TTAATTTTGGTCTAAAGGAGTTAATGGTGACACTATATTAATGTTGGTCAAGGCCTAA  
Te2-Lb -----

Cal2 ATTTATATGCTACTAATATTACTACTACCGATGCTAACGTTGGTTCGTTTCAGCTTTACTG  
LSU ATTTATATGCTACTAATATTACTACTACCGATGCTAACGTTGGTTCGTTTCAGCTTTACTG  
LSU-Lb ATTTATATGCTACTAATATTACTACTACCGATGCTAACGTTGGTTCGTTTCAGCTTTACTG  
Ar3-Lb ATTTATATGCTACTAATATTACTACTACCGATGCTAACGTTGGTTCGTTTCAGCTTTACTG  
As4-Lb ATTTATATGCTACTAATATTACTACTACCGATGCTAACGTTGGTTCGTTTCAGCTTTACTG  
Te2-Lb -----

Cal2 TCGGTGGAACAAATATAGTAAGCGGTACAGTCGGTGGACAGCAAGGTAATAAGTTTAAATA  
LSU TCGGTGGAACAAATATAGTAAGCGGTACAGTCGGTGGACAGCAAGGTAATAAGTTTAAATA  
LSU-Lb TCGGTGGAACAAATATAGTAAGCGGTACAGTCGGTGGACAGCAAGGTAATAAGTTTAAATA  
Ar3-Lb TCGGTGGAACAAATATAGTAAGCGGTACAGTCGGTGGACAGCAAGGTAATAAGTTTAAATA  
As4-Lb TCGGTGGAACAAATATAGTAAGCGGTACAGTCGGTGGACAGCAAGGTAATAAGTTTAAATA  
Te2-Lb -----

Cal2 CTGTAGAATTAGATAACGGTACTACTGCTAAGTTCCTTAGGTAACGCAATATTTAACGGTG  
LSU CTGTAGAATTAGATAACGGTACTACTGCTAAGTTCCTTAGGTAACGCAATATTTAACGGTG  
LSU-Lb CTGTAGAATTAGATAACGGTACTACTGCTAAGTTCCTTAGGTAACGCAATATTTAACGGTG  
Ar3-Lb CTGTAGAATTAGATAACGGTACTACTGCTAAGTTCCTTAGGTAACGCAATATTTAACGGTG  
As4-Lb CTGTAGAATTAGATAACGGTACTACTGCTAAGTTCCTTAGGTAACGCAATATTTAACGGTG  
Te2-Lb -----

Cal2 AAAC TACAATTGAAGCTAACTCTATCTTACAAATCGGTGGTAACTATACTGCAGATAAAGG  
LSU AAAC TACAATTGAAGCTAACTCTATCTTACAAATCGGTGGTAACTATACTGCAGATAAAGG  
LSU-Lb AAAC TACAATTGAAGCTAACTCTATCTTACAAATCGGTGGTAACTATACTGCAGATAAAGG  
Ar3-Lb AAAC TACAATTGAAGCTAACTCTATCTTACAAATCGGTGGTAACTATACTGCAGATAAAGG  
As4-Lb AAAC TACAATTGAAGCTAACTCTATCTTACAAATCGGTGGTAACTATACTGCAGATAAAGG  
Te2-Lb -----

Cal2 TTGAATCTGCTGATGGTACCGGTATAGTAGAATTTGTTAACACCACCTCTATTACCCTAA  
LSU TTGAATCTGCTGATGGTACCGGTATAGTAGAATTTGTTAACACCACCTCTATTACCCTAA  
LSU-Lb TTGAATCTGCTGATGGTACCGGTATAGTAGAATTTGTTAACACCACCTCTATTACCCTAA  
Ar3-Lb TTGAATCTGCTGATGGTACCGGTATAGTAGAATTTGTTAACACCACCTCTATTACCCTAA  
As4-Lb TTGAATCTGCTGATGGTACCGGTATAGTAGAATTTGTTAACACCACCTCTATTACCCTAA  
Te2-Lb -----

Genomic variability in *Rickettsia felis* strains; SUPPLEMENTARY MATERIAL

Cal2 CATTAACAACAAGCTGGACCTGTTGATGATTTAAAACAAATAACAGTTTCCGGTCGCG  
LSU CATTAACAACAAGCTGGACCTGTTGATGATTTAAAACAAATAACAGTTTCCGGTCGCG  
LSU-Lb CATTAACAACAAGCTGGACCTGTTGATGATTTAAAACAAATAACAGTTTCCGGTCGCG  
Ar3-Lb CATTAACAACAAGCTGGACCTGTTGATGATTTAAAACAAATAACAGTTTCCGGTCGCG  
As4-Lb CATTAACAACAAGCTGGACCTGTTGATGATTTAAAACAAATAACAGTTTCCGGTCGCG  
Te2-Lb -----

Cal2 GTAACGTAGTGATTAATGAAATAGGTAATGCAGGTAATGACCATGGTGCGGCGACTGATA  
LSU GTAACGTAGTGATTAATGAAATAGGTAATGCAGGTAATGACCATGGTGCGGCGACTGATA  
LSU-Lb GTAACGTAGTGATTAATGAAATAGGTAATGCAGGTAATGACCATGGTGCGGCGACTGATA  
Ar3-Lb GTAACGTAGTGATTAATGAAATAGGTAATGCAGGTAATGACCATGGTGCGGCGACTGATA  
As4-Lb GTAACGTAGTGATTAATGAAATAGGTAATGCAGGTAATGACCATGGTGCGGCGACTGATA  
Te2-Lb -----

Cal2 CAATTTCTTTTAAAAATGTAAGTTTAGGTGCAGCTTTATTCCTTACCTAACGGGATCCCAT  
LSU CAATTTCTTTTAAAAATGTAAGTTTAGGTGCAGCTTTATTCCTTACCTAACGGGATCCCAT  
LSU-Lb CAATTTCTTTTAAAAATGTAAGTTTAGGTGCAGCTTTATTCCTTACCTAACGGGATCCCAT  
Ar3-Lb CAATTTCTTTTAAAAATGTAAGTTTAGGTGCAGCTTTATTCCTTACCTAACGGGATCCCAT  
As4-Lb CAATTTCTTTTAAAAATGTAAGTTTAGGTGCAGCTTTATTCCTTACCTAACGGGATCCCAT  
Te2-Lb -----

Cal2 TAGACGGTTTAAACAATTAAGTACAGTAGGTAATGAAACAGCTACAGGTAATTTTGATG  
LSU TAGACGGTTTAAACAATTAAGTACAGTAGGTAATGAAACAGCTACAGGTAATTTTGATG  
LSU-Lb TAGACGGTTTAAACAATTAAGTACAGTAGGTAATGAAACAGCTACAGGTAATTTTGATG  
Ar3-Lb TAGACGGTTTAAACAATTAAGTACAGTAGGTAATGAAACAGCTACAGGTAATTTTGATG  
As4-Lb TAGACGGTTTAAACAATTAAGTACAGTAGGTAATGAAACAGCTACAGGTAATTTTGATG  
Te2-Lb -----

Cal2 TTCCTAGACTGATTGTTTCAGGTGTTGATAGCGTAATCGCTGACGGTCAAGCAATCGGTG  
LSU TTCCTAGACTGATTGTTTCAGGTGTTGATAGCGTAATCGCTGACGGTCAAGCAATCGGTG  
LSU-Lb TTCCTAGACTGATTGTTTCAGGTGTTGATAGCGTAATCGCTGACGGTCAAGCAATCGGTG  
Ar3-Lb TTCCTAGACTGATTGTTTCAGGTGTTGATAGCGTAATCGCTGACGGTCAAGCAATCGGTG  
As4-Lb TTCCTAGACTGATTGTTTCAGGTGTTGATAGCGTAATCGCTGACGGTCAAGCAATCGGTG  
Te2-Lb -----

Cal2 ATCAGGATAATATTGTAGGTCCTGGTCTTGGAAAGTGATAACAGTATTACTGTAAATGCTA  
LSU ATCAGGATAATATTGTAGGTCCTGGTCTTGGAAAGTGATAACAGTATTACTGTAAATGCTA  
LSU-Lb ATCAGGATAATATTGTAGGTCCTGGTCTTGGAAAGTGATAACAGTATTACTGTAAATGCTA  
Ar3-Lb ATCAGGATAATATTGTAGGTCCTGGTCTTGGAAAGTGATAACAGTATTACTGTAAATGCTA  
As4-Lb ATCAGGATAATATTGTAGGTCCTGGTCTTGGAAAGTGATAACAGTATTACTGTAAATGCTA  
Te2-Lb -----

Cal2 CTAAATTATATGCAGGTATCGGTAGCGTAAACAATAATCAAGGTACTGTACACTTAGCG  
LSU CTAAATTATATGCAGGTATCGGTAGCGTAAACAATAATCAAGGTACTGTACACTTAGCG  
LSU-Lb CTAAATTATATGCAGGTATCGGTAGCGTAAACAATAATCAAGGTACTGTACACTTAGCG  
Ar3-Lb CTAAATTATATGCAGGTATCGGTAGCGTAAACAATAATCAAGGTACTGTACACTTAGCG  
As4-Lb CTAAATTATATGCAGGTATCGGTAGCGTAAACAATAATCAAGGTACTGTACACTTAGCG  
Te2-Lb -----

Cal2 GCGGTATTCTAACACCCAGGTACAATTTACGGTTTAGGTATAGAGAACGGTAGTCCGA  
LSU GCGGTATTCTAACACCCAGGTACAATTTACGGTTTAGGTATAGAGAACGGTAGTCCGA  
LSU-Lb GCGGTATTCTAACACCCAGGTACAATTTACGGTTTAGGTATAGAGAACGGTAGTCCGA  
Ar3-Lb GCGGTATTCTAACACCCAGGTACAATTTACGGTTTAGGTATAGAGAACGGTAGTCCGA  
As4-Lb GCGGTATTCTAACACCCAGGTACAATTTACGGTTTAGGTATAGAGAACGGTAGTCCGA  
Te2-Lb -----

Cal2 AGTTAAAGCAAGTAACGTTTACTACAGACTATAACAACCTTAGGTAGTATTATCGCAACTA  
LSU AGTTAAAGCAAGTAACGTTTACTACAGACTATAACAACCTTAGGTAGTATTATCGCAACTA  
LSU-Lb AGTTAAAGCAAGTAACGTTTACTACAGACTATAACAACCTTAGGTAGTATTATCGCAACTA  
Ar3-Lb AGTTAAAGCAAGTAACGTTTACTACAGACTATAACAACCTTAGGTAGTATTATCGCAACTA  
As4-Lb AGTTAAAGCAAGTAACGTTTACTACAGACTATAACAACCTTAGGTAGTATTATCGCAACTA  
Te2-Lb -----

# Genomic variability in *Rickettsia felis* strains; SUPPLEMENTARY MATERIAL

Cal2 ACGCAACAATTAATGACGGGTAACTGTTACTACAGGTGGTGTAGCCGGAACAGATTTTCG  
LSU ACGCAACAATTAATGACGGGTAACTGTTACTACAGGTGGTGTAGCCGGAACAGATTTTCG  
LSU-Lb ACGCAACAATTAATGACGGGTAACTGTTACTACAGGTGGTGTAGCCGGAACAGATTTTCG  
Ar3-Lb ACGCAACAATTAATGACGGGTAACTGTTACTACAGGTGGTGTAGCCGGAACAGATTTTCG  
As4-Lb ACGCAACAATTAATGACGGGTAACTGTTACTACAGGTGGTGTAGCCGGAACAGATTTTCG  
Te2-Lb -----

Cal2 ACGGTA AAAATTACCC TTGGAAGTGT TAA TGGTAACGCTAATGTAAGATTTGTTGACGGTA  
LSU ACGGTA AAAATTACCC TTGGAAGTGT TAA TGGTAACGCTAATGTAAGATTTGTTGACGGTA  
LSU-Lb ACGGTA AAAATTACCC TTGGAAGTGT TAA TGGTAACGCTAATGTAAGATTTGTTGACGGTA  
Ar3-Lb ACGGTA AAAATTACCC TTGGAAGTGT TAA TGGTAACGCTAATGTAAGATTTGTTGACGGTA  
As4-Lb ACGGTA AAAATTACCC TTGGAAGTGT TAA TGGTAACGCTAATGTAAGATTTGTTGACGGTA  
Te2-Lb -----

Cal2 CATTTTCTGATTCTACAAGTATGATTGTTACTACTAAAGCTAATAACGGTACTGTAACCT  
LSU CATTTTCTGATTCTACAAGTATGATTGTTACTACTAAAGCTAATAACGGTACTGTAACCT  
LSU-Lb CATTTTCTGATTCTACAAGTATGATTGTTACTACTAAAGCTAATAACGGTACTGTAACCT  
Ar3-Lb CATTTTCTGATTCTACAAGTATGATTGTTACTACTAAAGCTAATAACGGTACTGTAACCT  
As4-Lb CATTTTCTGATTCTACAAGTATGATTGTTACTACTAAAGCTAATAACGGTACTGTAACCT  
Te2-Lb -----

Cal2 ACTTAGGTAGTGCATTAGTCGGTAATATAGGTAGTTCAGATACTCCGTAGCTTCTGTTA  
LSU ACTTAGGTAGTGCATTAGTCGGTAATATAGGTAGTTCAGATACTCCGTAGCTTCTGTTA  
LSU-Lb ACTTAGGTAGTGCATTAGTCGGTAATATAGGTAGTTCAGATACTCCGTAGCTTCTGTTA  
Ar3-Lb ACTTAGGTAGTGCATTAGTCGGTAATATAGGTAGTTCAGATACTCCGTAGCTTCTGTTA  
As4-Lb ACTTAGGTAGTGCATTAGTCGGTAATATAGGTAGTTCAGATACTCCGTAGCTTCTGTTA  
Te2-Lb -----

Cal2 AATTTATAGGTAGTGTATGATGGTGCAGGATTACAAGGAAATATTTATTCACAAGTCACAG  
LSU AATTTATAGGTAGTGTATGATGGTGCAGGATTACAAGGAAATATTTATTCACAAGTCACAG  
LSU-Lb AATTTATAGGTAGTGTATGATGGTGCAGGATTACAAGGAAATATTTATTCACAAGTCACAG  
Ar3-Lb AATTTATAGGTAGTGTATGATGGTGCAGGATTACAAGGAAATATTTATTCACAAGTCACAG  
As4-Lb AATTTATAGGTAGTGTATGATGGTGCAGGATTACAAGGAAATATTTATTCACAAGTCACAG  
Te2-Lb -----

Cal2 ACTTTGGTACTTATGACTTAAGTGT TTTAAAT TCTAACGTAATTTTAGCGGCGGTACTA  
LSU ACTTTGGTACTTATGACTTAAGTGT TTTAAAT TCTAACGTAATTTTAGCGGCGGTACTA  
LSU-Lb ACTTTGGTACTTATGACTTAAGTGT TTTAAAT TCTAACGTAATTTTAGCGGCGGTACTA  
Ar3-Lb ACTTTGGTACTTATGACTTAAGTGT TTTAAAT TCTAACGTAATTTTAGCGGCGGTACTA  
As4-Lb ACTTTGGTACTTATGACTTAAGTGT TTTAAAT TCTAACGTAATTTTAGCGGCGGTACTA  
Te2-Lb -----

Cal2 CTGCTATTAACGGTGAAATCGATCTTCTTACAAATACCTTAACATTTGCAAGCGGTACTT  
LSU CTGCTATTAACGGTGAAATCGATCTTCTTACAAATACCTTAACATTTGCAAGCGGTACTT  
LSU-Lb CTGCTATTAACGGTGAAATCGATCTTCTTACAAATACCTTAACATTTGCAAGCGGTACTT  
Ar3-Lb CTGCTATTAACGGTGAAATCGATCTTCTTACAAATACCTTAACATTTGCAAGCGGTACTT  
As4-Lb CTGCTATTAACGGTGAAATCGATCTTCTTACAAATACCTTAACATTTGCAAGCGGTACTT  
Te2-Lb -----

Cal2 CAACATGGGGAAGCAATACTTCTATTGAAACTACTTTAACAGTAGCAAACGGTAATATAG  
LSU CAACATGGGGAAGCAATACTTCTATTGAAACTACTTTAACAGTAGCAAACGGTAATATAG  
LSU-Lb CAACATGGGGAAGCAATACTTCTATTGAAACTACTTTAACAGTAGCAAACGGTAATATAG  
Ar3-Lb CAACATGGGGAAGCAATACTTCTATTGAAACTACTTTAACAGTAGCAAACGGTAATATAG  
As4-Lb CAACATGGGGAAGCAATACTTCTATTGAAACTACTTTAACAGTAGCAAACGGTAATATAG  
Te2-Lb -----

Cal2 GTCACATCGTTATTGCAGAAAATGCTCAAGTTAATGCAACAACACTACGGGAACAACAATA  
LSU GTCACATCGTTATTGCAGAAAATGCTCAAGTTAATGCAACAACACTACGGGAACAACAATA  
LSU-Lb GTCACATCGTTATTGCAGAAAATGCTCAAGTTAATGCAACAACACTACGGGAACAACAATA  
Ar3-Lb GTCACATCGTTATTGCAGAAAATGCTCAAGTTAATGCAACAACACTACGGGAACAACAATA  
As4-Lb GTCACATCGTTATTGCAGAAAATGCTCAAGTTAATGCAACAACACTACGGGAACAACAATA  
Te2-Lb -----

Genomic variability in *Rickettsia felis* strains; SUPPLEMENTARY MATERIAL

Cal2 TTAACGTACAAGATAATGCCAATGCAAATTTTCAGCGATACGCAAACCTATACTTTAATCC  
LSU TTAACGTACAAGATAATGCCAATGCAAATTTTCAGCGATACGCAAACCTATACTTTAATCC  
LSU-Lb TTAACGTACAAGATAATGCCAATGCAAATTTTCAGCGATACGCAAACCTATACTTTAATCC  
Ar3-Lb TTAACGTACAAGATAATGCCAATGCAAATTTTCAGCGATACGCAAACCTATACTTTAATCC  
As4-Lb TTAACGTACAAGATAATGCCAATGCAAATTTTCAGCGATACGCAAACCTATACTTTAATCC  
Te2-Lb -----

Cal2 AAGGTGGTGTAGATTTAACGGTACTTTAGGAGGTCCTAACCTTGTGTAACCGGAAGTA  
LSU AAGGTGGTGTAGATTTAACGGTACTTTAGGAGGTCCTAACCTTGTGTAACCGGAAGTA  
LSU-Lb AAGGTGGTGTAGATTTAACGGTACTTTAGGAGGTCCTAACCTTGTGTAACCGGAAGTA  
Ar3-Lb AAGGTGGTGTAGATTTAACGGTACTTTAGGAGGTCCTAACCTTGTGTAACCGGAAGTA  
As4-Lb AAGGTGGTGTAGATTTAACGGTACTTTAGGAGGTCCTAACCTTGTGTAACCGGAAGTA  
Te2-Lb -----

Cal2 ATCGTTTCGTTAATTACGGTTTAATACGTGCTGCTAACCAAGATTATGTAATAACACGTA  
LSU ATCGTTTCGTTAATTACGGTTTAATACGTGCTGCTAACCAAGATTATGTAATAACACGTA  
LSU-Lb ATCGTTTCGTTAATTACGGTTTAATACGTGCTGCTAACCAAGATTATGTAATAACACGTA  
Ar3-Lb ATCGTTTCGTTAATTACGGTTTAATACGTGCTGCTAACCAAGATTATGTAATAACACGTA  
As4-Lb ATCGTTTCGTTAATTACGGTTTAATACGTGCTGCTAACCAAGATTATGTAATAACACGTA  
Te2-Lb -----

Cal2 CTAACAATGCAGCAAACGTAGTTACTAATGATATCGCAAATAGCCCATTTGCAAGTGCAC  
LSU CTAACAATGCAGCAAACGTAGTTACTAATGATATCGCAAATAGCCCATTTGCAAGTGCAC  
LSU-Lb CTAACAATGCAGCAAACGTAGTTACTAATGATATCGCAAATAGCCCATTTGCAAGTGCAC  
Ar3-Lb CTAACAATGCAGCAAACGTAGTTACTAATGATATCGCAAATAGCCCATTTGCAAGTGCAC  
As4-Lb CTAACAATGCAGCAAACGTAGTTACTAATGATATCGCAAATAGCCCATTTGCAAGTGCAC  
Te2-Lb -----

Cal2 CGGGTGTAGGTCAGAACGTTACAACATTTGTAATTCAACTAATACTGCGGCGTATAATA  
LSU CGGGTGTAGGTCAGAACGTTACAACATTTGTAATTCAACTAATACTGCGGCGTATAATA  
LSU-Lb CGGGTGTAGGTCAGAACGTTACAACATTTGTAATTCAACTAATACTGCGGCGTATAATA  
Ar3-Lb CGGGTGTAGGTCAGAACGTTACAACATTTGTAATTCAACTAATACTGCGGCGTATAATA  
As4-Lb CGGGTGTAGGTCAGAACGTTACAACATTTGTAATTCAACTAATACTGCGGCGTATAATA  
Te2-Lb -----

Cal2 ATCTTCCTTTTAGCTAAAAATAGTGCTGATTCGCTAACTTTGTTGGAGCTATTACTACCG  
LSU ATCTTCCTTTTAGCTAAAAATAGTGCTGATTCGCTAACTTTGTTGGAGCTATTACTACCG  
LSU-Lb ATCTTCCTTTTAGCTAAAAATAGTGCTGATTCGCTAACTTTGTTGGAGCTATTACTACCG  
Ar3-Lb ATCTTCCTTTTAGCTAAAAATAGTGCTGATTCGCTAACTTTGTTGGAGCTATTACTACCG  
As4-Lb ATCTTCCTTTTAGCTAAAAATAGTGCTGATTCGCTAACTTTGTTGGAGCTATTACTACCG  
Te2-Lb -----

Cal2 ATACAAGTGCAGCCATAACTAATGCACAATTAGATGTAGCAAAGACATCCAAGCTCAAC  
LSU ATACAAGTGCAGCCATAACTAATGCACAATTAGATGTAGCAAAGACATCCAAGCTCAAC  
LSU-Lb ATACAAGTGCAGCCATAACTAATGCACAATTAGATGTAGCAAAGACATCCAAGCTCAAC  
Ar3-Lb ATACAAGTGCAGCCATAACTAATGCACAATTAGATGTAGCAAAGACATCCAAGCTCAAC  
As4-Lb ATACAAGTGCAGCCATAACTAATGCACAATTAGATGTAGCAAAGACATCCAAGCTCAAC  
Te2-Lb -----

Cal2 TTGGTAACAGATTAGGTGCTCTTAGATATTTAGGTACTCCTGAAACTGCTGAAATGGCTG  
LSU TTGGTAACAGATTAGGTGCTCTTAGATATTTAGGTACTCCTGAAACTGCTGAAATGGCTG  
LSU-Lb TTGGTAACAGATTAGGTGCTCTTAGATATTTAGGTACTCCTGAAACTGCTGAAATGGCTG  
Ar3-Lb TTGGTAACAGATTAGGTGCTCTTAGATATTTAGGTACTCCTGAAACTGCTGAAATGGCTG  
As4-Lb TTGGTAACAGATTAGGTGCTCTTAGATATTTAGGTACTCCTGAAACTGCTGAAATGGCTG  
Te2-Lb -----

Cal2 GACCTGAAGCTGGAGCAATACCGGCTGCGGTTGCTGCAGGTGACGAAGCTGTTGACAATG  
LSU GACCTGAAGCTGGAGCAATACCGGCTGCGGTTGCTGCAGGTGACGAAGCTGTTGACAATG  
LSU-Lb GACCTGAAGCTGGAGCAATACCGGCTGCGGTTGCTGCAGGTGACGAAGCTGTTGACAATG  
Ar3-Lb GACCTGAAGCTGGAGCAATACCGGCTGCGGTTGCTGCAGGTGACGAAGCTGTTGACAATG  
As4-Lb GACCTGAAGCTGGAGCAATACCGGCTGCGGTTGCTGCAGGTGACGAAGCTGTTGACAATG  
Te2-Lb -----



Genomic variability in *Rickettsia felis* strains; SUPPLEMENTARY MATERIAL

Cal2 TAGCTTACGGTATATGGGCAAACCTTCTATACTGATGCACATCAAAGTAAGAAAGGCG  
LSU TAGCTTACGGTATATGGGCAAACCTTCTATACTGATGCACATCAAAGTAAGAAAGGCG  
LSU-Lb TAGCTTACGGTATATGGGCAAACCTTCTATACTGATGCACATCAAAGTAAGAAAGGCG  
Ar3-Lb TAGCTTACGGTATATGGGCAAACCTTCTATACTGATGCACATCAAAGTAAGAAAGGCG  
As4-Lb TAGCTTACGGTATATGGGCAAACCTTCTATACTGATGCACATCAAAGTAAGAAAGGCG  
Te2-Lb -----

Cal2 GTTTAGCTGGTTATAAAGCTAAAACCACCGGTGTCGTAATAGGTTTAGACACGCTAGCTA  
LSU GTTTAGCTGGTTATAAAGCTAAAACCACCGGTGTCGTAATAGGTTTAGACACGCTAGCTA  
LSU-Lb GTTTAGCTGGTTATAAAGCTAAAACCACCGGTGTCGTAATAGGTTTAGACACGCTAGCTA  
Ar3-Lb GTTTAGCTGGTTATAAAGCTAAAACCACCGGTGTCGTAATAGGTTTAGACACGCTAGCTA  
As4-Lb GTTTAGCTGGTTATAAAGCTAAAACCACCGGTGTCGTAATAGGTTTAGACACGCTAGCTA  
Te2-Lb -----

Cal2 ACGATAACTTAATGATCGGTGCTGCTATCGGTATTACTAAAACCGATATAAAAACCCAGG  
LSU ACGATAACTTAATGATCGGTGCTGCTATCGGTATTACTAAAACCGATATAAAAACCCAGG  
LSU-Lb ACGATAACTTAATGATCGGTGCTGCTATCGGTATTACTAAAACCGATATAAAAACCCAGG  
Ar3-Lb ACGATAACTTAATGATCGGTGCTGCTACCGGTATTACTAAAACCGATATAAAAACCCAGG  
As4-Lb ACGATAACTTAATGATCGGTGCTGCTACCGGTATTACTAAAACCGATATAAAAACCCAGG  
Te2-Lb -----

Cal2 ATTATAAGAAAGGTGATAAAAACCGACGTTAACGGTTTCACATTCTCTCTATATGGTGCCC  
LSU ATTATAAGAAAGGTGATAAAAACCGACGTTAACGGTTTCACATTCTCTCTATATGGTGCCC  
LSU-Lb ATTATAAGAAAGGTGATAAAAACCGACGTTAACGGTTTCACATTCTCTCTATATGGTGCCC  
Ar3-Lb ATTATAAGAAAGGTGATAAAAACCGACGTTAACGGTTTCACATTCTCTCTATATGGTGCCC  
As4-Lb ATTATAAGAAAGGTGATAAAAACCGACGTTAACGGTTTCACATTCTCTCTATATGGTGCCC  
Te2-Lb -----

Cal2 AGCAGCTTGTTGAGAACTTCTTTGCTCAAGGTAGTGCAATATTTAGCTTAAACCAAGTGA  
LSU AGCAGCTTGTTGAGAACTTCTTTGCTCAAGGTAGTGCAATATTTAGCTTAAACCAAGTGA  
LSU-Lb AGCAGCTTGTTGAGAACTTCTTTGCTCAAGGTAGTGCAATATTTAGCTTAAACCAAGTGA  
Ar3-Lb AGCAGCTTGTTGAGAACTTCTTTGCTCAAGGTAGTGCAATATTTAGCTTAAACCAAGTGA  
As4-Lb AGCAGCTTGTTGAGAACTTCTTTGCTCAAGGTAGTGCAATATTTAGCTTAAACCAAGTGA  
Te2-Lb -----

Cal2 AGAACAAAAGTCAGCGTTACTTCTTCGATGCTAACGGTAAGATGAATAAGCAAATTGCTG  
LSU AGAACAAAAGTCAGCGTTACTTCTTCGATGCTAACGGTAAGATGAATAAGCAAATTGCTG  
LSU-Lb AGAACAAAAGTCAGCGTTACTTCTTCGATGCTAACGGTAAGATGAATAAGCAAATTGCTG  
Ar3-Lb AGAACAAAAGTCAGCGTTACTTCTTCGATGCTAACGGTAAGATGAATAAGCAAATTGCTG  
As4-Lb AGAACAAAAGTCAGCGTTACTTCTTCGATGCTAACGGTAAGATGAATAAGCAAATTGCTG  
Te2-Lb -----

Cal2 CCGGTAATTACGATAACATGACATTCGGTGGTAACTTAATGGTCGGTTATGATTACAATG  
LSU CCGGTAATTACGATAACATGACATTCGGTGGTAACTTAATGGTCGGTTATGATTACAATG  
LSU-Lb CCGGTAATTACGATAACATGACATTCGGTGGTAACTTAATGGTCGGTTATGATTACAATG  
Ar3-Lb CCGGTAATTACGATAACATGACATTCGGTGGTAACTTAATGGTCGGTTATGATTACAATG  
As4-Lb CCGGTAATTACGATAACATGACATTCGGTGGTAACTTAATGGTCGGTTATGATTACAATG  
Te2-Lb -----

Cal2 CAATGCAAGGTGTATTAGTAACTCCAATGGCAGGACTTAGCTACTTAAAGTCTTCTGACG  
LSU CAATGCAAGGTGTATTAGTAACTCCAATGGCAGGACTTAGCTACTTAAAGTCTTCTGACG  
LSU-Lb CAATGCAAGGTGTATTAGTAACTCCAATGGCAGGACTTAGCTACTTAAAGTCTTCTGACG  
Ar3-Lb CAATGCAAGGTGTATTAGTAACTCCAATGGCAGGACTTAGCTACTTAAAGTCTTCTGACG  
As4-Lb CAATGCAAGGTGTATTAGTAACTCCAATGGCAGGACTTAGCTACTTAAAGTCTTCTGACG  
Te2-Lb -----

Cal2 AAAACTACAAAGAAACCGGTACAACAGTTGCAAACAAGCAAGTTAACAGCAAGTTTAGCG  
LSU AAAACTACAAAGAAACCGGTACAACAGTTGCAAACAAGCAAGTTAACAGCAAGTTTAGCG  
LSU-Lb AAAACTACAAAGAAACCGGTACAACAGTTGCAAACAAGCAAGTTAACAGCAAGTTTAGCG  
Ar3-Lb AAAACTACAAAGAAACCGGTACAACAGTTGCAAACAAGCAAGTTAACAGCAAGTTTAGCG  
As4-Lb AAAACTACAAAGAAACCGGTACAACAGTTGCAAACAAGCAAGTTAACAGCAAGTTTAGCG  
Te2-Lb -----

## Genomic variability in *Rickettsia felis* strains; SUPPLEMENTARY MATERIAL

Ca12 ATAGAACTGATTTAATAGTAGGTGTTAAAGTAGCCGGTGGTACTATGAATATAACTGATC  
LSU ATAGAACTGATTTAATAGTAGGTGTTAAAGTAGCCGGTGGTACTATGAATATAACTGATC  
LSU-Lb ATAGAACTGATTTAATAGTAGGTGTTAAAGTAGCCGGTGGTACTATGAATATAACTGATC  
Ar3-Lb ATAGAACTGATTTAATAGTAGGTGTTAAAGTAGCCGGTGGTACTATGAATATAACTGATC  
As4-Lb ATAGAACTGATTTA-----  
Te2-Lb -----

Ca12 TTGCGGTATACCCGGAAGCTCAGCTTTTGTAGTTCACAAAGTAAATGGTAGATTATCTA  
LSU TTGCGGTATACCCGGAAGCTCAGCTTTTGTAGTTCACAAAGTAAATGGTAGATTATCTA  
LSU-Lb TTGCGGTATACCCGGAAGCTCAGCTTTTGTAGTTCACAAAGTAAATGGTAGATTATCTA  
Ar3-Lb TTGCGGTATACCCGGAAGCTCAGCTTTTGTAGTTCACAAAGTAAATGGTAGATTATCTA  
As4-Lb -----  
Te2-Lb -----

Ca12 AAACCTCAGTCTCAGTTAGATGGACAAGTTACTCCGTTTCATCAGCCAGCCTGACAGAACTG  
LSU AAACCTCAGTCTCAGTTAGATGGACAAGTTACTCCGTTTCATCAGCCAGCCTGACAGAACTG  
LSU-Lb AAACCTCAGTCTCAGTTAGATGGACAAGTTACTCCGTTTCATCAGCCAGCCTGACAGAACTG  
Ar3-Lb AAACCTCAGTCTCAGTTAGATGGACAAGTTACTCCGTTTCATCAGCCAGCCTGACAGAACTG  
As4-Lb -----  
Te2-Lb -----

Ca12 CTAAAACATCTTACAATATAGGTTTAAAGTGCAAGCATAAGACCTGATGCTAAGATGGAAT  
LSU CTAAAACATCTTACAATATAGGTTTAAAGTGCAAGCATAAGACCTGATGCTAAGATGGAAT  
LSU-Lb CTAAAACATCTTACAATATAGGTTTAAAGTGCAAGCATAAGACCTGATGCTAAGATGGAAT  
Ar3-Lb CTAAAACATCTTACAATATAGGTTTAAAGTGCAAGCATAAGACCTGATGCTAAGATGGAAT  
As4-Lb -----  
Te2-Lb -----

Ca12 ACGGAATCGGTTATGATTTCAATGCTGCAAGTAAGTATACTGCACATCAAGGTACTTTAA  
LSU ACGGAATCGGTTATGATTTCAATGCTGCAAGTAAGTATACTGCACATCAAGGTACTTTAA  
LSU-Lb ACGGAATCGGTTATGATTTCAATGCTGCAAGTAAGTATACTGCACATCAAGGTACTTTAA  
Ar3-Lb ACGGAATCGGTTATGATTTCAATGCTGCAAGTAAGTATACTGCACATCAAGGTACTTTAA  
As4-Lb -----  
Te2-Lb -----

Ca12 AAGTACGTGTAAACTTCTAA  
LSU AAGTACGTGTAAACTTCTAA  
LSU-Lb AAGTACGTGTAAACTTCTAA  
Ar3-Lb AAGTCCGTGTAAACTTCTAA  
As4-Lb -----  
Te2-Lb -----

## Literature Cited

Edgar RC 2004. MUSCLE: multiple sequence alignment with high accuracy and high throughput. *Nucleic Acids Res* 32: 1792-1797. doi: 10.1093/nar/gkh340  
32/5/1792 [pii]

**Supplementary fig. S5. Synteny analysis of four *R. felis* pRF plasmids.**

Alignment was performed with the complete plasmid pRF sequences of *Rickettsia felis* str. URRWXCa12 (NC\_007109), *R. felis* str. “AUS-Lb” (GQ329881) and *R. felis* str. LSU, plus eight stitched contigs from the *R. felis* str. LSU-Lb assembly. Genome sequence alignments were performed using Mauve v.2.3.1, utilizing the “progressiveMauve” option (Darling, et al. 2010). NOTE: some pRF genes of *R. felis* str. LSU-Lb were identified subsequently on small scaffolds and later included in the comparative analyses (see text for more details).

**Literature Cited**

Darling AE, Mau B, Perna NT 2010. progressiveMauve: multiple genome alignment with gene gain, loss and rearrangement. PLoS One 5: e11147. doi: 10.1371/journal.pone.0011147

URRWXCaI2

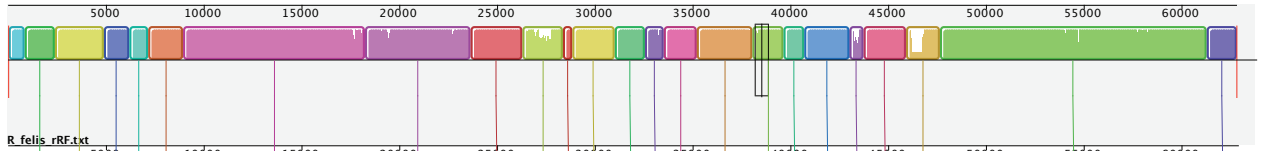

“AUS-Lb”

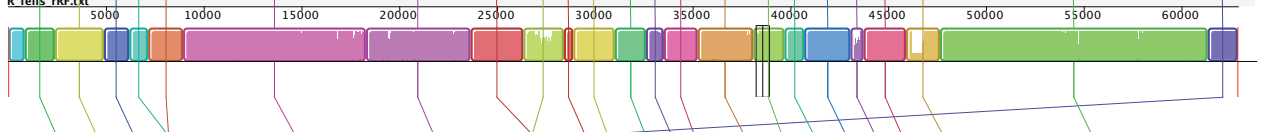

LSU

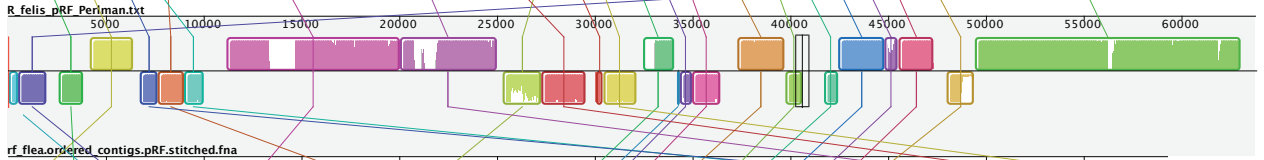

LSU-Lb

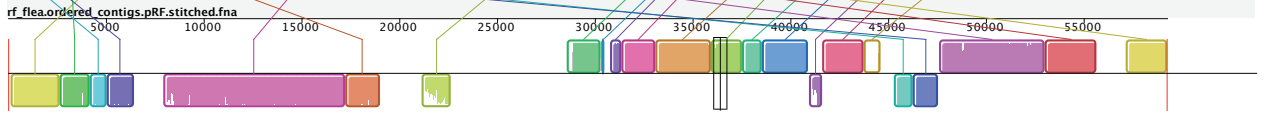

rf\_book.Rickettsia\_felis\_URRWXCaI2.pRF.ordered\_contigs.stitched\_ONE.fna

**Supplementary fig. S6. Comparative analysis of diverse pRF plasmids.**

(A) Plasmid pRF of *R. felis* str. URRWXCa2 was used as a reference to evaluate the conservation of its 68 CDS across the pRF plasmids of strains LSU, “AUS-Lb” and LSU-Lb. See text for details on orthologous group generation and analysis. Outer ring depicts the 68 CDS beginning at 12 o'clock and continuing clockwise. CDS denoted with asterisks depict truncated ORFs relative to larger homologs from other bacterial genomes. Ring 2: scale with coordinates (5 Kb intervals shown in larger numbers) as originally defined for pRF of *R. felis* str. URRWXCa2 (Ogata, et al. 2005). Rings 3-6: CDS encoded on plasmid pRF of *R. felis* strains URRWXCa2, LSU, “AUS-Lb” and LSU-Lb. Inset (gray box) describes the CDS color scheme. CDS with significant similarity are connected by thick gray arcs across the interior of the plot. Thin blue arcs depict split ORFs that are conserved across all four plasmids. Thin red arcs depict two instances where adjacent CDS are fused as one CDS in strain LSU-Lb. Plot made using Circos (Krzywinski, et al. 2009) with manual adjustment.

(B) Annotations for the 68 proteins encoded on plasmid pRF. Proteins highlighted yellow illustrate the 15 CDS that are conserved in length across pRF plasmids from *R. felis* strains URRWXCa2, LSU, “AUS-Lb” and LSU-Lb. CDS denoted with asterisks depict truncated ORFs relative to larger homologs from other bacterial genomes. Annotations are further described elsewhere (Gillespie, et al. 2007).

## Literature Cited

Gillespie JJ, et al. 2007. Plasmids and rickettsial evolution: insight from *Rickettsia felis*. PLoS One 2: e266. doi: 10.1371/journal.pone.0000266

Krzywinski M, et al. 2009. Circos: an information aesthetic for comparative genomics. Genome research 19: 1639-1645. doi: gr.092759.109 [pii] 10.1101/gr.092759.109

Ogata H, et al. 2005. The genome sequence of *Rickettsia felis* identifies the first putative conjugative plasmid in an obligate intracellular parasite. PLoS Biol 3: e248. doi: 05-PLBI-RA-0181R2 [pii] 10.1371/journal.pbio.0030248

A

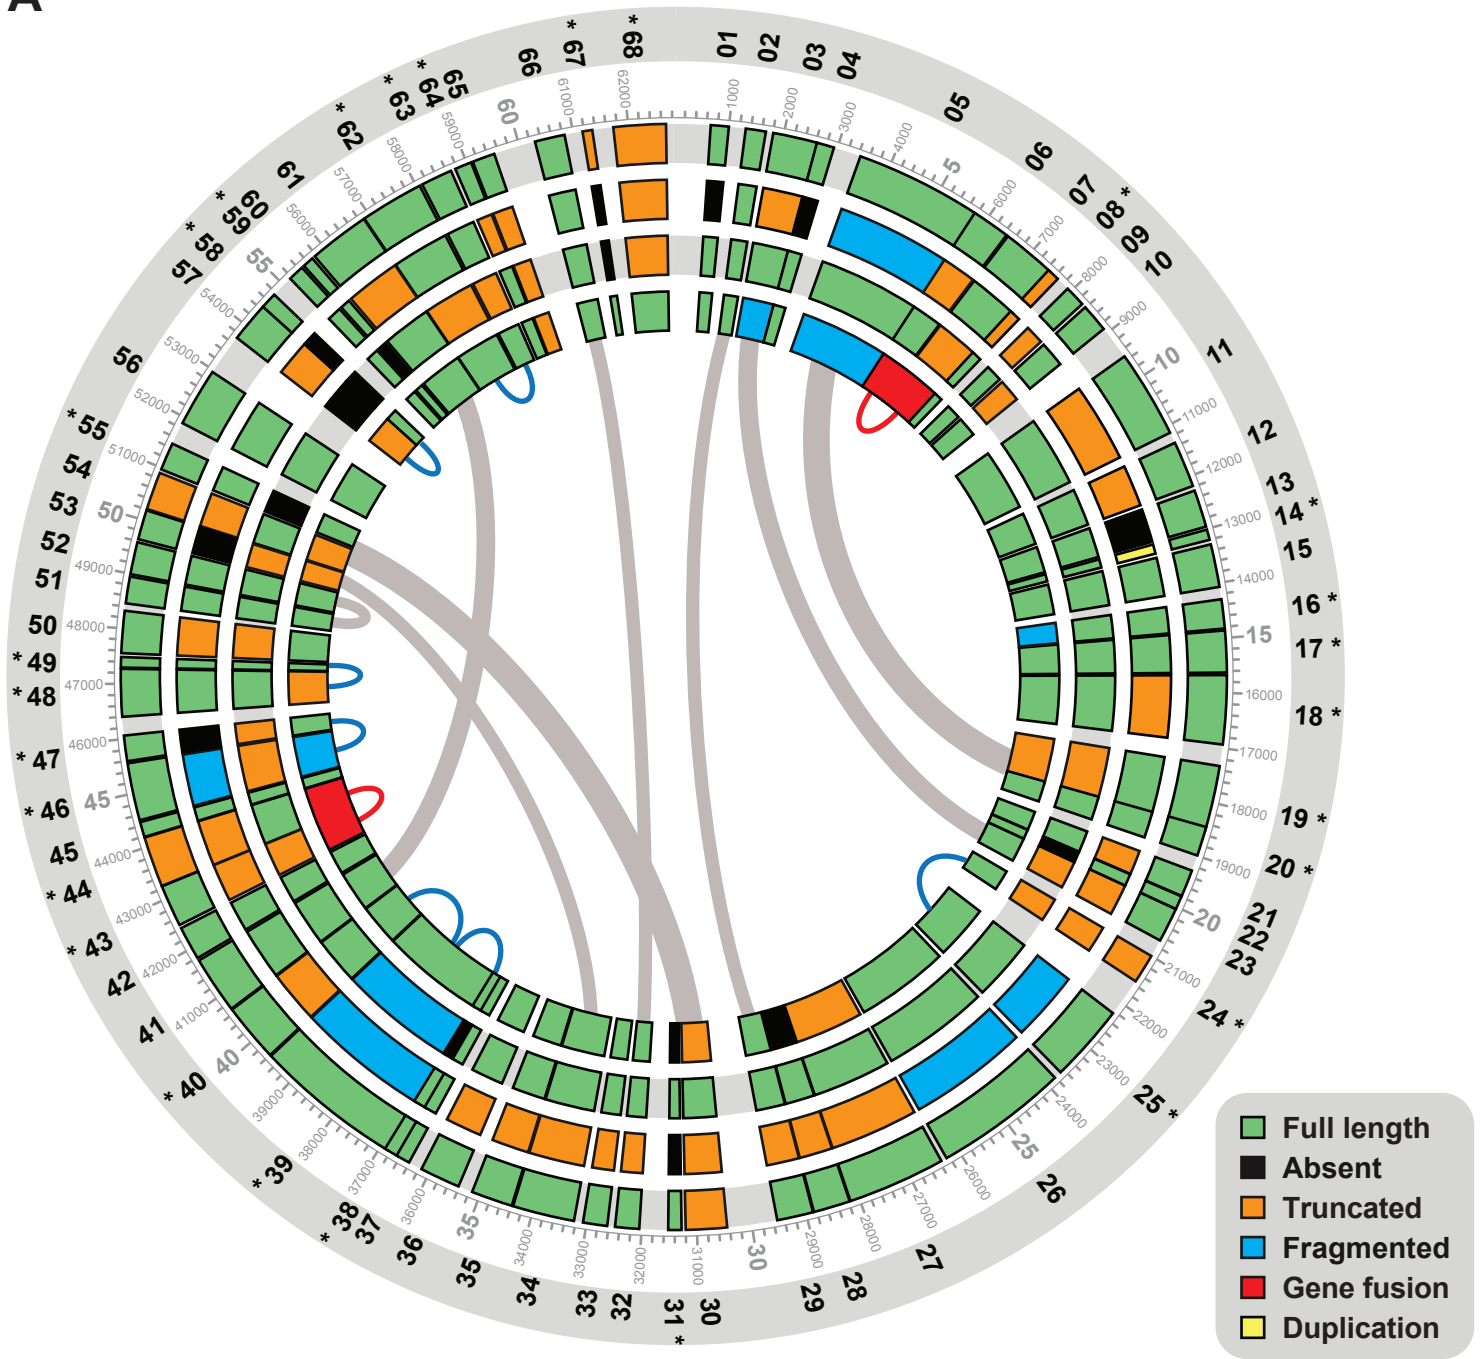

B

|                              |                               |                                 |                                |                             |
|------------------------------|-------------------------------|---------------------------------|--------------------------------|-----------------------------|
| 01: YP_247417: TNP           | <b>15: YP_247431: HP</b>      | 29: YP_247445: HTH_26           | 43: YP_247459: TraD (F) *      | 57: YP_247473: TNP          |
| <b>02: YP_247418: HTH_26</b> | 16: YP_247432: TPR *          | 30: YP_247446: TNP              | 44: YP_247460: TraD (F) *      | 58: YP_247474: TNP *        |
| 03: YP_247419: ParA          | <b>17: YP_247433: TPR *</b>   | 31: YP_247447: TNP *            | <b>45: YP_247461: HP</b>       | <b>59: YP_247475: HP</b>    |
| 04: YP_247420: HP            | 18: YP_247434: TPR *          | 32: YP_247448: PinR             | 46: YP_247462: TraG_C *        | 60: YP_247476: TNP          |
| 05: YP_247421: DnaA_N        | 19: YP_247435: DnaA_N         | 33: YP_247449: HP               | 47: YP_247463: TraG_N *        | 61: YP_247477: TNP          |
| 06: YP_247422: Hsd_R         | <b>20: YP_247436: DnaA_N</b>  | 34: YP_247450: DnaQ             | 48: YP_247464: ISRpe1 *        | 62: YP_247478: TraA2 (Ti) * |
| 07: YP_247423: Hsd_M         | 21: YP_247437: HTH_XRE        | 35: YP_247451: ParB             | <b>49: YP_247465: ISRpe1 *</b> | 63: YP_247479: TraA2 (Ti) * |
| 08: YP_247424: PleD *        | 22: YP_247438: HP             | 36: YP_247452: HP               | 50: YP_247466: HP              | 64: YP_247480: TNP *        |
| 09: YP_247425: HP            | 23: YP_247439: ParA           | <b>37: YP_247453: TraD (Ti)</b> | <b>51: YP_247467: IbpA</b>     | 65: YP_247481: HP           |
| 10: YP_247426: HP            | <b>24: YP_247440: Sca12 *</b> | 38: YP_247454: TraA (Ti) *      | <b>52: YP_247468: IbpA</b>     | <b>66: YP_247482: PinR</b>  |
| 11: YP_247427: Pat1B         | 25: YP_247441: Sca12 *        | 39: YP_247455: TraA (Ti) *      | 53: YP_247469: DnaQ *          | 67: YP_247483: TNP *        |
| 12: YP_247428: HP            | 26: YP_247442: Lon            | 40: YP_247456: TraA (Ti) *      | 54: YP_247470: TNP             | 68: YP_247484: HP           |
| 13: YP_247429: TMPK          | 27: YP_247443: SMC-like       | <b>41: YP_247457: TNP</b>       | 55: YP_247471: TNP *           |                             |
| <b>14: YP_247430: ANK *</b>  | 28: YP_247444: HP             | <b>42: YP_247458: ANK</b>       | <b>56: YP_247472: NAGidase</b> |                             |

**Supplementary fig. S7.** *R. felis* str. LSU-Lb carries a novel rickettsial plasmid, pLbaR.

(A) Schema depicting the characteristics for plasmid of *Liposcelis bostrychophila* associated *Rickettsia* (pLbaR). The plasmid is shown circularized, though attempts to close the single contig at its ends (12 o'clock) with PCR failed (see text for more information). Plot made using Circos [\(Krzywinski, et al. 2009\)](#) with manual adjustment. The details for the seven rings are described below the plot.

(B) Annotations and other information for the 43 proteins encoded on plasmid pLbaR.

(C) Top BLASTP hits to each of the 43 proteins encoded on plasmid pLbaR. BLASTP searches were performed against the Rickettsiales database (*left*) and the nr database excluding Rickettsiales (*right*).

## Literature Cited

Krzywinski M, et al. 2009. Circos: an information aesthetic for comparative genomics. *Genome research* 19: 1639-1645. doi: [gr.092759.109](https://doi.org/10.1101/gr.092759.109) [pii]  
10.1101/gr.092759.109

A

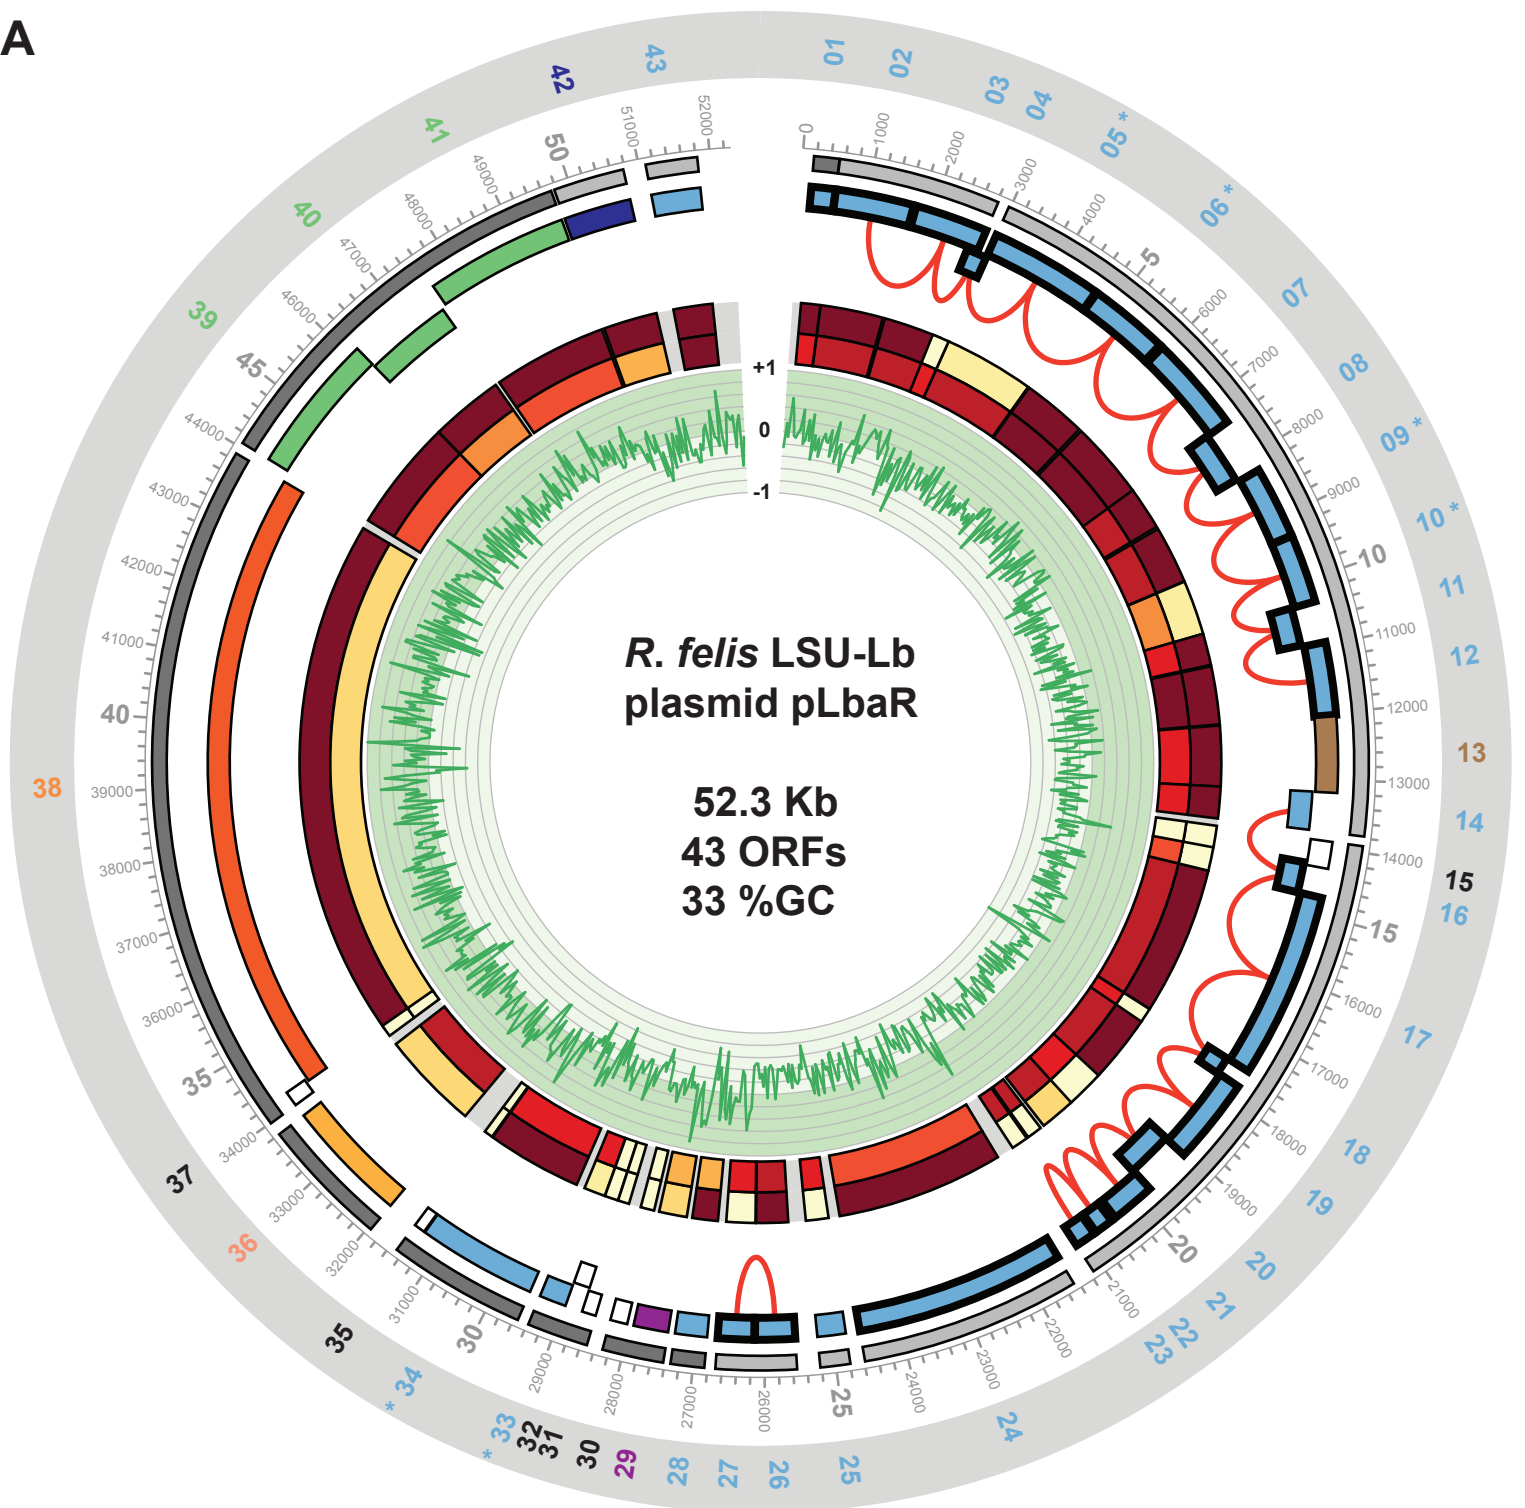

**Ring Description**

- 1 CDS 01-43; annotations provided in panel B, BLASTP results provided in panel C. Asterisks, split ORFs.
- 2 Coordinates noted every 1000 nt, with 5 Kb intervals shown in larger numbers.
- 3 Predicted transcriptional units and operons: dark gray, forward strand; light gray, reverse strand.
- 4 Predicted CDS, colored by taxonomy of top BLASTP match: light blue, *Rickettsia* (heavy border = REIS specifically); brown, Cyanobacteria; white, no significant match; purple, *Deltaproteobacteria*; light orange, Rickettsiaceae bacterium Os18; dark orange, *Orientia*; green, *Gammaproteobacteria*; dark blue, Bacteroidetes. Red arcs depict genes syntenic with regions of the REIS genome.
- 5 Heatmap depicting number of BLASTP matches (yellow = 0, red = 50).
- 6 Heatmap depicting %ID of top BLASTP match (yellow = 0, red = 100).
- 7 GC skew,  $(G-C)/(G+C)$ , calculated on a fixed 50 nt window. Spectra ranges from -1 (G = 0) to +1 (C = 0).



# B

| ID | Size (aa) | Description                                                    | Brief comment                                                                       |
|----|-----------|----------------------------------------------------------------|-------------------------------------------------------------------------------------|
| 01 | 119       | transposase                                                    | Transposase (Mutator family, pfam00872), proliferated in REIS.                      |
| 02 | 389       | conjugative transfer protein TraD                              | RAGE F-T4SS, coupling protein TraD; truncated at CT.                                |
| 03 | 362       | lytic transglycosylase, catalytic                              | Fusion: NT (1-220) hits nothing, CT (221-362) MltE lytic transglycosylase.          |
| 04 | 105       | hypothetical protein                                           | Truncated 109 aa at NT relative to REIS homolog.                                    |
| 05 | 562       | conserved hypothetical protein                                 | RAGE F-T4SS, TraG; corresponds to 409-972 of TraG of pREIS3).                       |
| 06 | 400       | conserved hypothetical protein                                 | RAGE F-T4SS, TraG; corresponds to 1-397 of TraG (pREIS3).                           |
| 07 | 485       | hypothetical protein                                           | RAGE F-T4SS, TraH.                                                                  |
| 08 | 268       | hypothetical protein                                           | RAGE F-T4SS, TraF.                                                                  |
| 09 | 359       | conserved hypothetical protein                                 | RAGE F-T4SS, TraN; contains central and CT of TraN proteins.                        |
| 10 | 340       | hypothetical protein                                           | RAGE F-T4SS, TraN; contains partial sequence of NT of TraN proteins.                |
| 11 | 196       | type-F conjugative transfer system pilin assembly protein TrbC | RAGE F-T4SS, TrbC.                                                                  |
| 12 | 360       | sex pilus assembly                                             | RAGE F-T4SS, TraU.                                                                  |
| 13 | 376       | hypothetical protein RF_1220                                   | DUF1016: uncharacterized proteins, potentially nucleases.                           |
| 14 | 196       | type-F conjugative transfer system protein TraW                | RAGE F-T4SS, TraW.                                                                  |
| 15 | 133       | Tolq transport protein [SPURIOUS]                              | Hypothetical protein, no significant matches.                                       |
| 16 | 157       | hypothetical protein                                           | Hypothetical protein, only significant match is pREIS_2273.                         |
| 17 | 926       | inner-membrane protein TraC                                    | RAGE F-T4SS, TraC.                                                                  |
| 18 | 91        | hypothetical protein                                           | RAGE F-T4SS, TraV.                                                                  |
| 19 | 428       | TraB pilus assembly                                            | RAGE F-T4SS, TraB.                                                                  |
| 20 | 240       | hypothetical protein                                           | RAGE F-T4SS, TraK; full length as on pREIS3 (split in all other RAGEs).             |
| 21 | 220       | hypothetical protein                                           | RAGE F-T4SS, TraE.                                                                  |
| 22 | 94        | putative lipoprotein                                           | Hypothetical protein known only from pREIS3.                                        |
| 23 | 104       | hypothetical protein                                           | Hypothetical protein known only from pREIS3.                                        |
| 24 | 1041      | tetratricopeptide repeat domain protein                        | Fusion: NT LuxR-like domain, CT tetratricopeptide repeat domain.                    |
| 25 | 140       | hypothetical protein RPR_p19                                   | Truncation of Sca4 variant encoded on pRPR, pREIS1 and pREIS3.                      |
| 26 | 197       | guanosine polyphosphate pyrophosphohydrolase/synthetase        | SpoT synthetase.                                                                    |
| 27 | 179       | cell surface antigen Sca12                                     | Fragment corresponding to NT region of Sca12 of pREIS3.                             |
| 28 | 158       | hypothetical protein RMA_p12                                   | HTH_26 [pfam13443]; Cro/C1-type HTH DNA-binding domain.                             |
| 29 | 172       | chromosome partitioning protein-like protein                   | ParA protein encoded on many <i>Rickettsia</i> plasmids.                            |
| 30 | 84        | hypothetical protein CRE_18161                                 | Hypothetical protein, no significant matches.                                       |
| 31 | 69        | small GTP-binding domain protein [SPURIOUS]                    | Hypothetical protein, no significant matches.                                       |
| 32 | 84        | hypothetical protein                                           | Hypothetical protein, only significant match is <i>R. australis</i> (WP_017208726). |
| 33 | 133       | DnaA-like protein                                              | Split ORF: corresponds to 1-130 of DnaA (pRPR of <i>R. peacockii</i> ).             |
| 34 | 592       | DnaA-like protein                                              | Split ORF: corresponds to 188-771 of DnaA (pRPR of <i>R. peacockii</i> ).           |
| 35 | 54        | hypothetical protein                                           | Fragment of possible phage protein (DUF4065).                                       |
| 36 | 614       | hypothetical protein                                           | Present in Rickettsiaceae bacterium Os18 and <i>Wolbachia</i> species.              |
| 37 | 75        | hypothetical protein Frac_1873                                 | Hypothetical protein, no significant matches.                                       |
| 38 | 3241      | hypothetical protein OTBS_0978                                 | Multi-domains: OTU-like cysteine protease, Tox-SGS, ANK.                            |
| 39 | 695       | metal ABC transporter permease                                 | T1SS C39-like ABC transporter; <i>Rickettsia/Cardinium</i> LGT.                     |
| 40 | 454       | hemolysin secretion protein D                                  | T1SS membrane fusion protein; <i>Rickettsia/Cardinium</i> LGT.                      |
| 41 | 710       | cyclolysin secretion/processing ATP-binding protein CyaB       | T1SS C39-like ABC transporter; <i>Rickettsia/Cardinium</i> LGT.                     |
| 42 | 334       | hypothetical protein rsib_orf696                               | Known mostly from Cytophaga-Flavobacterium-Bacteroides species.                     |
| 43 | 242       | chromosome segregation ATPase [SPURIOUS]                       | PD-(D/E)XK nuclease family transposase; <i>Rickettsia/Cardinium</i> LGT.            |

□ RAGE illustrated in **FIG 3**.

□ RTX-like T1SS illustrated in **FIG 4**.

■ Split ORFs.

## C

| ID | Rickettsiales<br>Top hit                                    | E-value   | %ID   | Non-Rickettsiales<br>Top hit                                          | E-value   | %ID   |
|----|-------------------------------------------------------------|-----------|-------|-----------------------------------------------------------------------|-----------|-------|
| 01 | <i>Rickettsia</i> endosymbiont ( <i>Ixodes scapularis</i> ) | 4.00E-43  | 75.45 | <i>Chlorobium phaeobacteroides</i> DSM 266                            | 3.00E-34  | 58.65 |
| 02 | <i>Rickettsia</i> endosymbiont ( <i>Ixodes scapularis</i> ) | 0         | 86.65 | <i>Candidatus</i> Protochlamydia amoebophila UWE25                    | 1.00E-36  | 31.15 |
| 03 | <i>Rickettsia</i> endosymbiont ( <i>Ixodes scapularis</i> ) | 6.00E-63  | 83.33 | <i>Mesorhizobium</i> sp. LSHC424B00                                   | 1.00E-20  | 43.9  |
| 04 | <i>Rickettsia</i> endosymbiont ( <i>Ixodes scapularis</i> ) | 5.00E-25  | 67.31 | <i>Mycobacterium</i> sp. 360MFTsu5.1                                  | 0.47      | 29    |
| 05 | <i>Rickettsia</i> endosymbiont ( <i>Ixodes scapularis</i> ) | 0         | 87.23 | <i>Fluoribacter dumoffii</i>                                          | 9.00E-05  | 34.58 |
| 06 | <i>Rickettsia</i> endosymbiont ( <i>Ixodes scapularis</i> ) | 0         | 91.94 | uncultured bacterium                                                  | 8.00E-34  | 31.98 |
| 07 | <i>Rickettsia</i> endosymbiont ( <i>Ixodes scapularis</i> ) | 0         | 89.13 | uncultured bacterium                                                  | 4.00E-26  | 26.74 |
| 08 | <i>Rickettsia</i> endosymbiont ( <i>Ixodes scapularis</i> ) | 7.00E-124 | 83.08 | <i>Mariprofundus ferrooxydans</i>                                     | 6.00E-15  | 25.44 |
| 09 | <i>Rickettsia</i> endosymbiont ( <i>Ixodes scapularis</i> ) | 3.00E-168 | 81.23 | <i>Escherichia coli</i>                                               | 3.00E-35  | 33.01 |
| 10 | <i>Rickettsia</i> endosymbiont ( <i>Ixodes scapularis</i> ) | 7.00E-96  | 53.91 | <i>Clostridium symbiosum</i> WAL-14673                                | 2.9       | 30    |
| 11 | <i>Rickettsia</i> endosymbiont ( <i>Ixodes scapularis</i> ) | 9.00E-76  | 73.47 | uncultured bacterium                                                  | 6.00E-09  | 35.71 |
| 12 | <i>Rickettsia</i> endosymbiont ( <i>Ixodes scapularis</i> ) | 0         | 89.17 | <i>Sphingomonas</i> sp. KA1                                           | 2.00E-87  | 46.69 |
| 13 | <i>Rickettsia felis</i> URRWXCal2                           | 5.00E-56  | 38.54 | uncultured bacterium                                                  | 6.00E-136 | 68.53 |
| 14 | <i>Candidatus</i> Rickettsia amblyomii AaR/SC               | 7.00E-79  | 76.44 | <i>Gallionella capsiferiformans</i> ES-2                              | 2.00E-23  | 34.25 |
| 15 | <i>Candidatus</i> Midichloria mitochondrii IricVA           | 8.60E+00  | 55    | <i>Clostridium</i> sp. CAG:58                                         | 4.30E-01  | 28    |
| 16 | <i>Rickettsia</i> endosymbiont ( <i>Ixodes scapularis</i> ) | 1.00E-41  | 63.45 | <i>Nannochloropsis gaditana</i>                                       | 1.5       | 26    |
| 17 | <i>Rickettsia</i> endosymbiont ( <i>Ixodes scapularis</i> ) | 0         | 88.66 | uncultured bacterium                                                  | 2.00E-72  | 25.96 |
| 18 | <i>Rickettsia</i> endosymbiont ( <i>Ixodes scapularis</i> ) | 1.00E-28  | 77.63 | Lachnospiraceae bacterium 3-1                                         | 8.00E-06  | 31    |
| 19 | <i>Rickettsia</i> endosymbiont ( <i>Ixodes scapularis</i> ) | 0         | 84.11 | <i>Thiobacillus denitrificans</i>                                     | 2.00E-27  | 37.02 |
| 20 | <i>Rickettsia</i> endosymbiont ( <i>Ixodes scapularis</i> ) | 1.00E-103 | 77.5  | <i>Thiobacillus denitrificans</i>                                     | 0.002     | 24.21 |
| 21 | <i>Rickettsia</i> endosymbiont ( <i>Ixodes scapularis</i> ) | 3.00E-103 | 86.82 | <i>Aromatoleum aromaticum</i> EbN1                                    | 3.00E-05  | 22.22 |
| 22 | <i>Rickettsia</i> endosymbiont ( <i>Ixodes scapularis</i> ) | 9.00E-38  | 82.98 | <i>Dictyostelium discoideum</i> AX4                                   | 3.5       | 38    |
| 23 | <i>Rickettsia</i> endosymbiont ( <i>Ixodes scapularis</i> ) | 3.00E-38  | 85.86 | <i>Streptomyces acidiscabies</i>                                      | 0.26      | 44    |
| 24 | <i>Rickettsia</i> endosymbiont ( <i>Ixodes scapularis</i> ) | 0         | 56.03 | uncultured bacterium                                                  | 6.00E-139 | 30.6  |
| 25 | <i>Rickettsia peacockii</i> Rustic                          | 7.00E-37  | 76.7  | <i>Schizophyllum commune</i> H4-8                                     | 0.42      | 36    |
| 26 | <i>Rickettsia</i> endosymbiont ( <i>Ixodes scapularis</i> ) | 2.00E-85  | 78.68 | <i>Genlisea aurea</i>                                                 | 4.00E-32  | 58    |
| 27 | <i>Rickettsia</i> endosymbiont ( <i>Ixodes scapularis</i> ) | 5.00E-20  | 68.69 | <i>Sclerotinia sclerotiorum</i> 1980                                  | 4         | 34    |
| 28 | <i>Rickettsia massiliae</i> MTU5                            | 4.00E-26  | 38.99 | <i>Peptoclostridium difficile</i>                                     | 4.00E-04  | 38    |
| 29 | <i>Candidatus</i> Rickettsia amblyomii GAT-30V              | 0.056     | 42.62 | SAR324 cluster bacterium JCVI-SC AAA005                               | 2.00E-22  | 36.94 |
| 30 | -----                                                       | -----     | ----- | <i>Caenorhabditis remanei</i>                                         | 2.20E+00  | 35    |
| 31 | -----                                                       | -----     | ----- | <i>Tetrahymena thermophila</i> SB210                                  | 6.70E+00  | 48    |
| 32 | <i>Rickettsia australis</i>                                 | 8.00E-04  | 33    | <i>Deinococcus peraridilitoris</i> DSM 19664                          | 5.10E+00  | 35    |
| 33 | <i>Rickettsia peacockii</i> Rustic                          | 1.00E-42  | 66.92 | <i>Psychrobacter</i> sp. JCM 18903                                    | 0.12      | 38    |
| 34 | <i>Rickettsia peacockii</i> Rustic                          | 0         | 68.13 | <i>Ixodes scapularis</i>                                              | 4.00E-94  | 73    |
| 35 | -----                                                       | -----     | ----- | -----                                                                 | -----     | ----- |
| 36 | Rickettsiaceae bacterium Os18                               | 0         | 79.13 | <i>Alligator sinensis</i>                                             | 0.23      | 25    |
| 37 | -----                                                       | -----     | ----- | <i>Marivirga tractuosa</i> DSM 4126                                   | 0.67      | 32    |
| 38 | <i>Orientia tsutsugamushi</i> Boryong                       | 3.00E-162 | 31.68 | <i>Diplorickettsia massiliensis</i>                                   | 5.00E-38  | 27.06 |
| 39 | <i>Candidatus</i> Odysella thessalonicensis                 | 2.00E-75  | 32    | <i>Moritella</i> sp. PE36                                             | 0         | 57.58 |
| 40 | <i>Rickettsia canadensis</i>                                | 3.00E-20  | 29.14 | <i>Photorhabdus luminescens</i> subsp. laumondii TTO1                 | 8.00E-102 | 45.67 |
| 41 | <i>Rickettsia</i> endosymbiont ( <i>Ixodes scapularis</i> ) | 4.00E-96  | 92.5  | <i>Vibrio nigripulchritudo</i>                                        | 0         | 58    |
| 42 | <i>Rickettsia sibirica</i> 246                              | 2.60E-01  | 25.96 | <i>Proteiniphilum acetatigenes</i>                                    | 4.00E-45  | 35.83 |
| 43 | <i>Rickettsia monacensis</i>                                | 3.00E-130 | 95.02 | <i>Cardinium</i> endosymbiont cEper1 ( <i>Encarsia pergandiella</i> ) | 3.00E-107 | 78.84 |

■ Illustrates the stronger hit across the two databases.

■ Split ORFs.

**Supplementary fig. S8. Phylogeny estimation of DUF1016 proteins.**

All proteins are putative members of the PD-(D/E)XK phosphodiesterase superfamily. The YhcG protein of *Escherichia coli*, as well as putative uncharacterized phage proteins of some Rickettsiales, are noted. All other proteins are annotated as 'hypothetical protein'. The sequence encoded on the pLbaR plasmid of *Rickettsia felis* str. LSU-Lb is highlighted yellow (see [fig. 3](#) for more information). Sequences were obtained from NCBI prior to April 20<sup>th</sup>, 2014 (accession numbers provided after species names) and aligned using MUSCLE v3.6 (default parameters) ([Edgar 2004](#)). Phylogeny was estimated under maximum likelihood using RAxML v.7.2.8 ([Stamatakis, et al. 2008](#)). Tree is final optimization likelihood: (-32464.484679) using WAG substitution model with GAMMA and proportion of invariant sites estimated. Branch support is from 1000 bootstrap pseudoreplications.

## Literature Cited

Edgar RC 2004. MUSCLE: multiple sequence alignment with high accuracy and high throughput. *Nucleic acids research* 32: 1792-1797. doi: 10.1093/nar/gkh340  
32/5/1792 [pii]

Stamatakis A, Hoover P, Rougemont J 2008. A rapid bootstrap algorithm for the RAxML Web servers. *Syst Biol* 57: 758-771. doi: 904007647 [pii]  
10.1080/10635150802429642

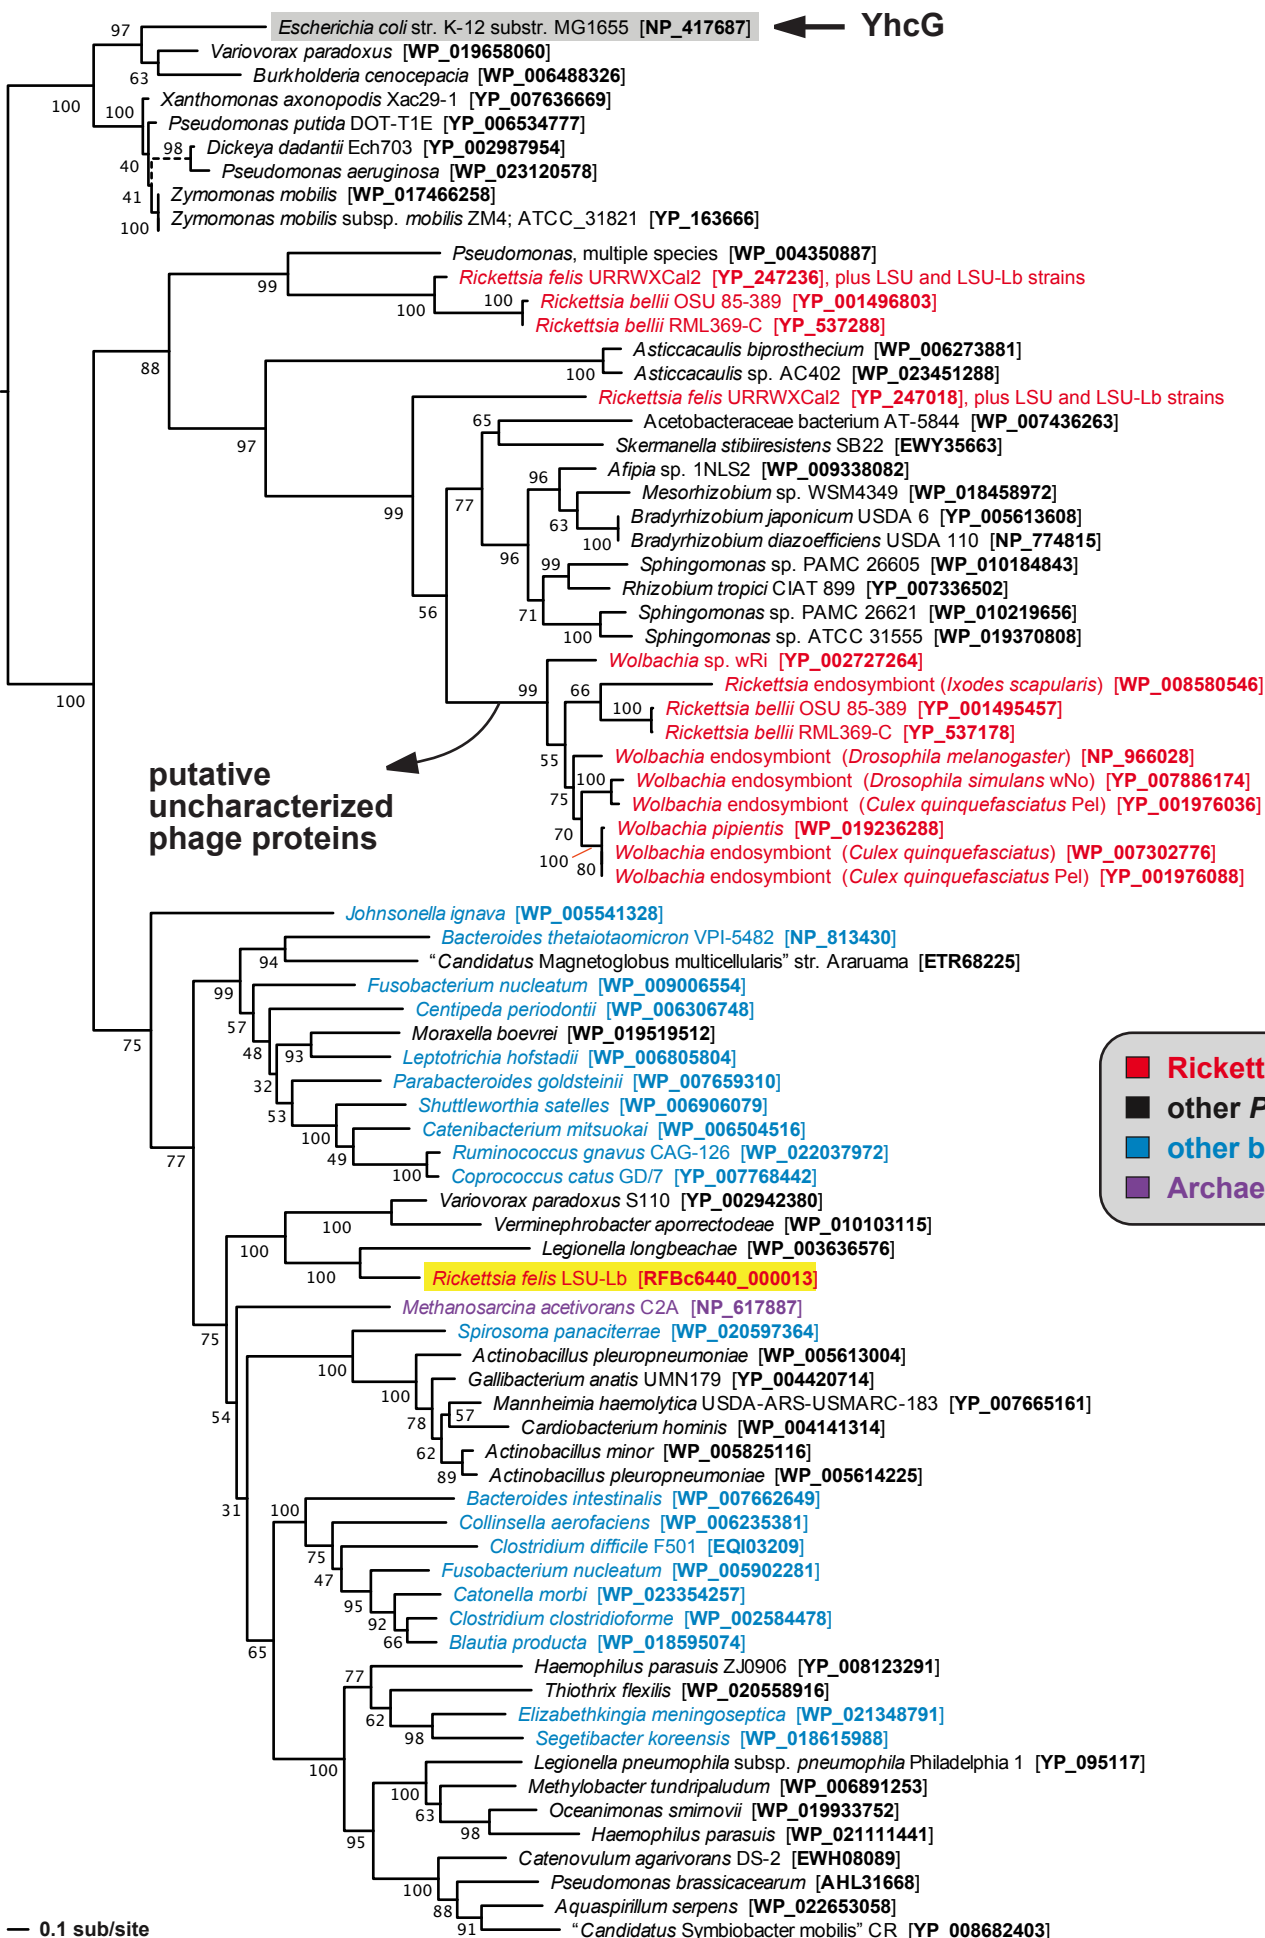

■ Rickettsiales  
■ other Proteobacteria  
■ other bacteria  
■ Archaea

**Supplementary fig. S9.** Plasmid pLbaR of *R. felis* str. LSU-Lb encodes an RHS-like toxin adjacent to an RTX-like T1SS operon.

(A) Schema of region 34173-49728 of plasmid pLbaR, which depicts the genes encoding the recombination hot spot (RHS) toxin (pLbaR\_38) and the RTX-like T1SS (pLbaR39-41). The gene models are drawn to scale. See [fig. 4](#) for further description of the RTX-like T1SS.

(B) Characteristics of the RHS-like toxin encoded on pLbaR. Three distinct domains, colored brown, were identified: 1) an NT (pos. 22-180) OTU-like cysteine protease domain, pfam02338 ([Makarova, et al. 2000](#)), 2) an internal (pos. 2813-2924) salivary gland secreted toxin (Tox-SGS) domain, pfam15651 ([Arca, et al. 2005](#); [Korochkina, et al. 2006](#)), and 3) a CT ankyrin (ANK) repeat domain (pos. 3079-3161), which contains two ANK repeats. The top BLASTP hits to pLbaR\_38 are shown below the schema, with regions of similarity color coded according to taxa. NOTE: BLASTP hits to the ANK domain are not shown.

(C) pLbaR\_38 encodes an OTU-like cysteine protease domain. pfam02338 is comprised of cysteine proteases that are similar to the Ovarian tumor (OTU) protein of *Drosophila* spp. ([Makarova, et al. 2000](#)). Residues within the active site (Asp, Cys and His) are highlighted yellow across the alignment of pLbaR\_38 and eight diverse OTU and OTU-like proteins. These proteins have been shown to play a role in deubiquitination ([Balakirev, et al. 2003](#)).

(D) pLbaR\_38 encodes a Salivary Gland Secreted protein domain toxin. pfam15651 (Tox-SGS) contains proteins with an alpha+beta fold domain, which contains four conserved Cys residues and a conserved [DE]xx[ND] motif ([Arca, et al. 2005](#); [Korochkina, et al. 2006](#)). These residues are highlighted yellow across the alignment of pLbaR\_38 and eight diverse proteins from various mosquito species. The Tox-SGS domain is mainly present at the C-terminus of RHS proteins from arthropods and crustaceans. While few bacterial homologs have been identified, the domain architecture indicates an origin from bacterial polymorphic toxin systems ([Zhang, et al. 2012](#)).

## Literature Cited

Arca B, et al. 2005. An updated catalogue of salivary gland transcripts in the adult female mosquito, *Anopheles gambiae*. The Journal of experimental biology 208: 3971-3986. doi: 10.1242/jeb.01849

## Genomic variability in *Rickettsia felis* strains; SUPPLEMENTARY MATERIAL

Balakirev MY, Tcherniuk SO, Jaquinod M, Chroboczek J 2003. Otubains: a new family of cysteine proteases in the ubiquitin pathway. *EMBO reports* 4: 517-522. doi: 10.1038/sj.embor.embor824

Korochkina S, et al. 2006. A mosquito-specific protein family includes candidate receptors for malaria sporozoite invasion of salivary glands. *Cellular microbiology* 8: 163-175. doi: 10.1111/j.1462-5822.2005.00611.x

Makarova KS, Aravind L, Koonin EV 2000. A novel superfamily of predicted cysteine proteases from eukaryotes, viruses and *Chlamydia pneumoniae*. *Trends in biochemical sciences* 25: 50-52.

Zhang D, de Souza RF, Anantharaman V, Iyer LM, Aravind L 2012. Polymorphic toxin systems: Comprehensive characterization of trafficking modes, processing, mechanisms of action, immunity and ecology using comparative genomics. *Biology direct* 7: 18. doi: 10.1186/1745-6150-7-18

A

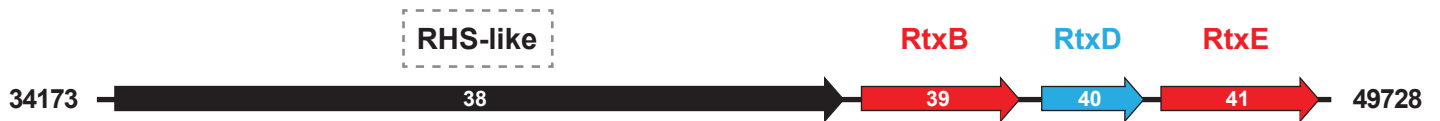

B

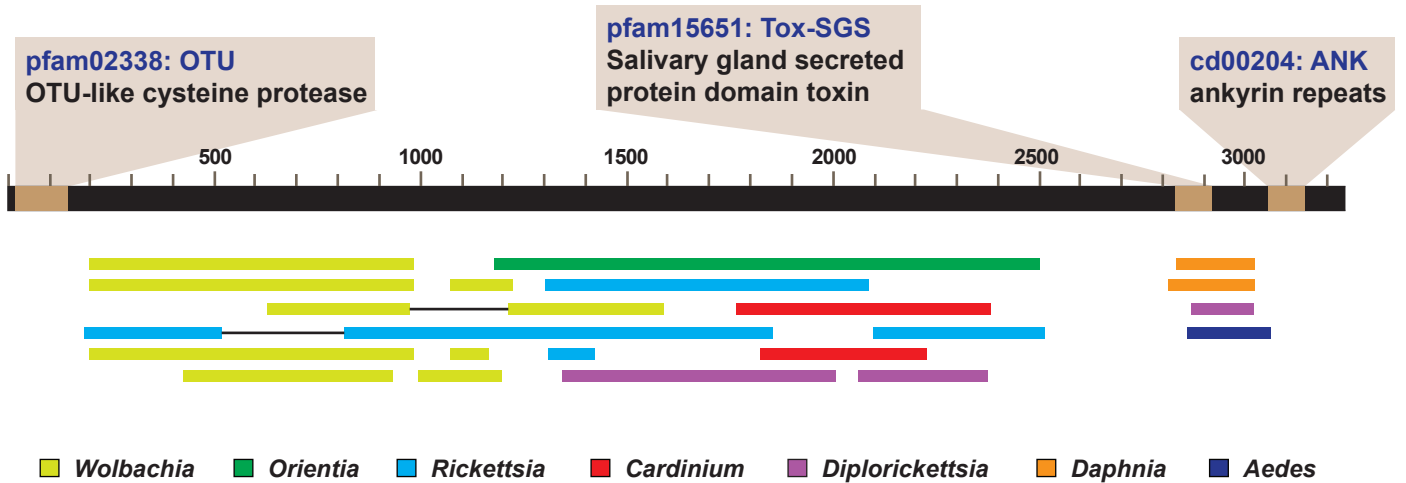

C

|                 |     |        |                       |      |         |       |     |       |         |      |      |     |       |       |         |         |     |
|-----------------|-----|--------|-----------------------|------|---------|-------|-----|-------|---------|------|------|-----|-------|-------|---------|---------|-----|
| <b>pLbaR_38</b> | 17  | . [2]. | DGSC <sup>*</sup> LF. | [2]. | TALAYL. | [16]. | LF. | [9].  | HIRELI  | KEY. | [6]. | VR. | [47]. | SWG   | EPEIVAM | 134     |     |
| 3BY4_A          | 26  | . [2]. | DNSCLF                |      | HAIAYG  |       | IF. | [6].  | DLREMV  | SKE  |      | VL. | [26]. | SWG   | AIEIGII | 95      |     |
| gi 74870488     | 35  | . [2]. | DASSLF                |      | RVVAEQ  |       | VY. | [7].  | EVMEC   | VRY  |      | MF. | [25]. | TAGT  | ILELGAM | 104     |     |
| gi 81981603     | 30  | . [2]. | DGACIF                |      | RAVAHV  |       | VY. | [7].  | EVGAI   | VEH  |      | VT. | [26]. | EFGT  | AIEINAA | 100     |     |
| gi 75023271     | 130 | . [2]. | DGNCLL                |      | HAASLG  |       | MW. | [11]. | TLYELL. | [5]. | KEA  | IR. | [23]. | EWEL. | [32].   | AIHVFAL | 238 |
| gi 74870587     | 156 | . [2]. | DNSCLF                |      | TSIRFV  |       | LN. | [9].  | MMRHII  | AQE  |      | VA. | [26]. | SWG   | AIEVSIL | 228     |     |
| gi 74626036     | 191 | . [2]. | DGNCLF                |      | ASISHQ  |       | LN. | [10]. | ALRNKS  | ADY  |      | VL. | [32]. | KWGS  | DIEIQAL | 270     |     |
| gi 75162409     | 171 | . [2]. | DGHCLY                |      | RAVENQ  |       | LA. | [12]. | NLREMA  | ASY  |      | MR. | [38]. | AWGS  | QLELGAL | 258     |     |
| gi 75100002     | 3   | . [2]. | DGNQCF                |      | RALADQ  |       | LY. | [7].  | LVRQEI  | VKQ  |      | NM. | [6].  | QWGD  | EVTLRVA | 53      |     |
| gi 221331077    | 62  | . [2]. | DGACLF                |      | RSISLQ  |       | IY. | [7].  | VIRQHT  | MDY  |      | IH. | [25]. | AHGN  | HIEIQAI | 131     |     |

|                 |     |             |       |          |      |    |     |  |  |  |  |  |  |  |  |  |
|-----------------|-----|-------------|-------|----------|------|----|-----|--|--|--|--|--|--|--|--|--|
| <b>pLbaR_38</b> | 135 | GRMLGATINV. | [21]. | NAARSAS. | [6]. | HY | 180 |  |  |  |  |  |  |  |  |  |
| 3BY4_A          | 96  | SDALAVAIYV. | [17]. | NYILILF. | [3]. | HY | 134 |  |  |  |  |  |  |  |  |  |
| gi 74870488     | 105 | CHLYRRNVII. | [17]. | EILRIFM. | [4]. | HF | 144 |  |  |  |  |  |  |  |  |  |
| gi 81981603     | 101 | NRLYRVSEFI. | [16]. | PVAYLKF. | [7]. | HY | 142 |  |  |  |  |  |  |  |  |  |
| gi 75023271     | 239 | AHVLRKPVVV. | [29]. | PSQCHRS. | [9]. | HF | 295 |  |  |  |  |  |  |  |  |  |
| gi 74870587     | 229 | SNYGGIEIDV. | [18]. | LRVFLF.  | [3]. | HY | 268 |  |  |  |  |  |  |  |  |  |
| gi 74626036     | 271 | ANSLEVPVHV. | [18]. | KPLCIAV. | [9]. | HY | 316 |  |  |  |  |  |  |  |  |  |
| gi 75162409     | 259 | THCLRKHIV.  | [19]. | SSLMSY.  | [9]. | HY | 305 |  |  |  |  |  |  |  |  |  |
| gi 75100002     | 54  | ADVYQVKIIL. | [21]. | KVIHMSY. | [4]. | HF | 97  |  |  |  |  |  |  |  |  |  |
| gi 221331077    | 132 | SEIYSRTVEV. | [20]. | PPLRLSY. | [4]. | HY | 174 |  |  |  |  |  |  |  |  |  |

*Rickettsia felis* str. LSU-Lb  
*Saccharomyces cerevisiae*  
*Drosophila melanogaster*  
*Lymantria dispar* multiple nucleopolyhedrovirus  
*Caenorhabditis elegans*  
*Drosophila melanogaster*  
*Schizosaccharomyces pombe* 972h-  
*Arabidopsis thaliana*  
*Arabidopsis thaliana*  
*Drosophila melanogaster*

D

|                 |      |        |      |      |                                                                                   |      |     |      |                                                                                                                                      |      |
|-----------------|------|--------|------|------|-----------------------------------------------------------------------------------|------|-----|------|--------------------------------------------------------------------------------------------------------------------------------------|------|
| <b>pLbaR_38</b> | 2813 | . [1]. | YCV. | [7]. | SKKYVKDTM <sup>*</sup> CTSLSGQTKVFSNIH.                                           | [2]. | SN. | [7]. | SIGGDSYKNC <sup>*</sup> RPVEFYGRPSVY <sup>*</sup> CKGNHTNLIHAPN                                                                      | 2894 |
| gi 122067766    | 3123 | . [1]. | LCY  |      | SPDS <sup>*</sup> DGNQIC <sup>*</sup> PQRESTVNI <sup>*</sup> FSKGE.               | [3]. | PE  |      | AFGQDLFSRCLPLTWHDRPSIACDGEQ <sup>*</sup> TTFIYTPN                                                                                    | 3191 |
| gi 74782564     | 3145 | . [1]. | NCY. | [3]. | SEEHLDGMIS <sup>*</sup> CFGHSSTVTI <sup>*</sup> IPKFE.                            | [2]. | PR  |      | IENADHYK <sup>*</sup> CMPLTYDGHPSAS <sup>*</sup> CEGEWSSLVY <sup>*</sup> TAK                                                         | 3215 |
| gi 74782563     | 3121 | . [1]. | NCY. | [1]. | VTHGELNYVNC <sup>*</sup> YS <sup>*</sup> DQGLVTI <sup>*</sup> FPKVE               |      | AI  |      | LQSHDEYRNCLPLTYDGV <sup>*</sup> RGIS <sup>*</sup> CDGEQ <sup>*</sup> STLLAVQI                                                        | 3187 |
| gi 122106611    | 1399 | . [1]. | NCF. | [3]. | PNNDENPSI <sup>*</sup> KCYGHS <sup>*</sup> QTSI <sup>*</sup> HYKTY                |      | HA  |      | EITQDRFQ <sup>*</sup> SCYPI <sup>*</sup> YNGI <sup>*</sup> PSV <sup>*</sup> SC <sup>*</sup> EGQ <sup>*</sup> ESSLL <sup>*</sup> FTSY | 1467 |
| gi 74845679     | 3077 | . [1]. | NCF. | [2]. | NSADNLNTIT <sup>*</sup> CYEQHGLSYV <sup>*</sup> FPHNT.                            | [2]. | IS  |      | GITEDHYSS <sup>*</sup> CYPIEY <sup>*</sup> NGLLT <sup>*</sup> TAC <sup>*</sup> AGT <sup>*</sup> NSS <sup>*</sup> MYTPY               | 3146 |
| gi 170062183    | 3179 | . [1]. | NCI  |      | AMNPDRSFYEC <sup>*</sup> FQSTAKVLL <sup>*</sup> FAQNL.                            | [2]. | ES  |      | GSIPTGIDRCVPLHWHGQPSV <sup>*</sup> GC <sup>*</sup> Q <sup>*</sup> Q <sup>*</sup> Q <sup>*</sup> FGFI <sup>*</sup> YTPY               | 3246 |
| gi 170062185    | 2524 | . [1]. | NCV  |      | PTNSDISSYT <sup>*</sup> CYQSTAKVEV <sup>*</sup> FPKPE.                            | [3]. | RA  |      | PHSVVPM <sup>*</sup> DGCAP <sup>*</sup> FHWYGRPA <sup>*</sup> IG <sup>*</sup> CEGQ <sup>*</sup> DFAFI <sup>*</sup> YTPY              | 2592 |
| gi 312381518    | 3023 | . [1]. | NCY. | [4]. | PMEGMRDYV <sup>*</sup> KCY <sup>*</sup> SQ <sup>*</sup> SSTEAL <sup>*</sup> HPKPH |      | AK  |      | LEASDHYS <sup>*</sup> CMPI <sup>*</sup> YAG <sup>*</sup> T <sup>*</sup> PSI <sup>*</sup> SC <sup>*</sup> DGERSNLL <sup>*</sup> SMQL  | 3092 |
| gi 54066706     | 3074 | . [1]. | NCF. | [2]. | NSADNLNTIT <sup>*</sup> CYEQHGLSYV <sup>*</sup> FPHNT.                            | [2]. | II  |      | GITEDHYSS <sup>*</sup> CYPIEY <sup>*</sup> NGLLT <sup>*</sup> TAC <sup>*</sup> AGT <sup>*</sup> NSS <sup>*</sup> MYTPY               | 3143 |

[DE]xx[ND]

|                 |      |     |      |                                                                                                |                                                                                   |      |      |  |                                     |
|-----------------|------|-----|------|------------------------------------------------------------------------------------------------|-----------------------------------------------------------------------------------|------|------|--|-------------------------------------|
| <b>pLbaR_38</b> | 2895 | IQ  | P    | RLFD <sup>*</sup> SL <sup>*</sup> SNLMLG <sup>*</sup> SVILH <sup>*</sup> QVRK <sup>*</sup> FY. | [3].                                                                              | 2924 |      |  | <i>Rickettsia felis</i> str. LSU-Lb |
| gi 122067766    | 3192 | QN  | I    | RVFDMVD <sup>*</sup> GWMLLARI <sup>*</sup> APAAL <sup>*</sup> RNLK.                            | [3].                                                                              | 3221 |      |  | <i>Aedes aegypti</i>                |
| gi 74782564     | 3216 | ET  | A    | RVFDFVD <sup>*</sup> GWILLAQV <sup>*</sup> APIAWKEIK.                                          | [3].                                                                              | 3245 |      |  | <i>Anopheles gambiae</i>            |
| gi 74782563     | 3188 | EP  | P    | RLF <sup>*</sup> EYVDSWLLLAH <sup>*</sup> VAPAAV <sup>*</sup> REVK.                            | [3].                                                                              | 3217 |      |  | <i>Anopheles gambiae</i>            |
| gi 122106611    | 1468 | ET  | P    | RLF <sup>*</sup> DHVD <sup>*</sup> GWILLARVI <sup>*</sup> PTA <sup>*</sup> KNIV.               | [3].                                                                              | 1497 |      |  | <i>Aedes aegypti</i>                |
| gi 74845679     | 3147 | IR. | [1]. | V                                                                                              | NYLDQ <sup>*</sup> LNGLT <sup>*</sup> LLLVAPT <sup>*</sup> VVRNIA.                | [3]. | 3177 |  | <i>Anopheles gambiae</i>            |
| gi 170062183    | 3247 | EA  | T    | KMFS <sup>*</sup> FLD <sup>*</sup> GWMLLARV <sup>*</sup> GLQV <sup>*</sup> VENWR.              | [3].                                                                              | 3276 |      |  | <i>Culex quinquefasciatus</i>       |
| gi 170062185    | 2593 | ET  | P    | KWFS <sup>*</sup> FLD <sup>*</sup> GWLLLVRV <sup>*</sup> GVQI <sup>*</sup> VGDLK.              | [3].                                                                              | 2622 |      |  | <i>Culex quinquefasciatus</i>       |
| gi 312381518    | 3093 | LP. | [2]. | P                                                                                              | KVFD <sup>*</sup> YLD <sup>*</sup> GWLLLARV <sup>*</sup> APAA <sup>*</sup> LRDVK. | [3]. | 3124 |  | <i>Anopheles darlingi</i>           |
| gi 54066706     | 3144 | IR  | P.   | [1].                                                                                           | NYLDQ <sup>*</sup> LNGLT <sup>*</sup> LLLVAPT <sup>*</sup> VVRNIA.                | [3]. | 3174 |  | <i>Anopheles gambiae</i>            |
