# Supplementary material for: Genomic Diversification in Strains of Rickettsia felis Isolated from Different Arthropods
Source: PubMed Central journal article supplement (PMC4316617; doi:10.1093/gbe/evu262), 2014-12-04
Supplement: supp_evu262_Supp_Mat_Tables_1-3.pdf [file supp_evu262_Supp_Mat_Tables_1-3.pdf]

**Supplementary table S1. Primers used to confirm predicted SNPs.**

| <b><i>R. felis</i> str. LSU</b>    |                         |                                          |                                                  |                            |
|------------------------------------|-------------------------|------------------------------------------|--------------------------------------------------|----------------------------|
| <b>Reference</b> <sup>1</sup>      | <b>SNP</b> <sup>2</sup> | <b>Primer name</b>                       | <b>Sequence</b> <sup>3</sup>                     | <b>Method</b> <sup>4</sup> |
| YP_246280                          | 1                       | Flea-GV00001_F<br>Flea-GV00001_R         | GATTCCGGTTGCAATGACGG<br>TGATCGATAATACGCCCCGG     | Direct                     |
| YP_246397                          | 1                       | Flea-GV00002_F<br>Flea-GV00002_R         | GTACCGAGAGTTGCAAGGCA<br>GCCGTTTCCTGTAGTTTGGG     | Cloning                    |
| YP_246455                          | 1                       | Flea-GV00003_F<br>Flea-GV00003_R         | GGGCTGCTATTGTTCCGAGT<br>CGTTAAGCTGCACTTTGTTTCCT  | Cloning                    |
| YP_246493                          | 1                       | Flea-GV00004_F<br>Flea-GV00004_R         | AGCGTTGTTTCTTCGGGGAT<br>TGCAGTTTGATCGCCCGTAT     | Direct                     |
| YP_246703                          | 1                       | Flea-GV00005_F<br>Flea-GV00005_R         | TGCTTACGCAACAACACAGG<br>CCACCCTCTGCAACGGTAAA     | Direct                     |
| YP_246853                          | 2                       | Flea-GV00006-7_F<br>Flea-GV00006-7_R     | ATGCAGGACCTAAGCCATGG<br>AATCAATGACCTCCTGCCCCG    | Direct                     |
| YP_246866-<br>YP_246867            | 10                      | Flea-GV00008-17_F<br>Flea-GV00008-17_R   | TCTCGACTAAACTCCAAACAGCT<br>AGAGACGCAGCAGTTAGAACT | Direct                     |
| YP_246867                          | 1                       | Flea-GV000018_F<br>Flea-GV000018_R       | AGTTCTAACTGCTGCGTCTCT<br>TCCCTAGCTTAGCAAAGAAGC   | Direct                     |
| YP_246869                          | 3                       | Flea-GV000019-21_F<br>Flea-GV000019-21_R | TCCGATAAATAGCCGCTGTCT<br>AAAGCAGAAGAAACGGGCGA    | Direct                     |
| YP_246869                          | 1                       | Flea-GV000022_F<br>Flea-GV000022_R       | TGCTTTGAGCTAACAAGTGCA<br>AGGCTGGGATAGTGAGGGAA    | Direct                     |
| YP_247161                          | 1                       | Flea-GV000023_F<br>Flea-GV000023_R       | ATAGGACGTCCGTTTGCAGG<br>GGTCGTTTCCGTCAGAACCT     | Direct                     |
| <b><i>R. felis</i> str. LSU-Lb</b> |                         |                                          |                                                  |                            |
| <b>Reference</b> <sup>1</sup>      | <b>SNP</b> <sup>2</sup> | <b>Primer name</b>                       | <b>Sequence</b> <sup>3</sup>                     | <b>Method</b> <sup>4</sup> |
| YP_246042                          | 1                       | Lice-GV00002_F<br>Lice-GV00002_R         | AGGCAATCATCCTAAGGTTGCT<br>CCGGAGCGTTTTTCTCAAGG   | Direct                     |
| YP_246394                          | 1                       | Lice-GV00015_F<br>Lice-GV00015_R         | ACTGGAGTTAGAGACGGCGA<br>AGACCGCGGGATCCATTTTT     | Direct                     |
| YP_246425                          | 1                       | Lice-GV00019_F<br>Lice-GV00019_R         | AAAGCCCCAGGTTTTTGGTGA<br>CACCGTTTTACCGGCATTT     | Direct                     |
| rRNA                               | 1                       | Lice-GV00022_F<br>Lice-GV00022_R         | CCGACGATCTGTAGCTGGTC<br>AGCTGCGAAACCGAAAGAGA     | Direct                     |
| YP_246641                          | 1                       | Lice-GV00040_F<br>Lice-GV00040_R         | GGTGGCTGTTTACAACAATGGG<br>ACCATACACAACCACCTCCT   | Direct                     |

***R. felis* str. LSU-Lb (Cont'd.)**

| Reference <sup>1</sup> | SNP <sup>2</sup> | Primer name                      | Sequence <sup>3</sup>                          | Method <sup>4</sup> |
|------------------------|------------------|----------------------------------|------------------------------------------------|---------------------|
| YP_246654              | 1                | Lice-GV00041_F<br>Lice-GV00041_R | AAGCAAATCGCCTGTACCGT<br>TCTTGGAGTCGGAACAACGG   | Cloning             |
| YP_246658              | 1                | Lice-GV00044_F<br>Lice-GV00044_R | AGTGCCGCTATTTGGGTCAA<br>AGGAGCGGCTGAAACTTACC   | Cloning             |
| YP_246683              | 1                | Lice-GV00047_F<br>Lice-GV00047_R | CTGCTTGCGGAGTTTGCTTT<br>TATCTGGCTAGCCCCCTCAG   | Direct              |
| YP_246887              | 1                | Lice-GV00057_F<br>Lice-GV00057_R | GCACCTCTTGACCGCATTTC<br>TGCAAATGCCAGCCAAACAA   | Direct              |
| YP_246894              | 1                | Lice-GV00058_F<br>Lice-GV00058_R | AGCGATGTAGCAGTACAGTCA<br>TGCAACGACTTGTGGAGGTT  | Direct              |
| YP_247229              | 1                | Lice-GV00074_F<br>Lice-GV00074_R | GACCATCTAAGTCCTCCGCG<br>GGCACTTGGGATGCTTGCTA   | Cloning             |
| YP_247265              | 1                | Lice-GV00078_F<br>Lice-GV00078_R | ATTTTCAGCATGCACGCAAGG<br>GTTGCGAAAGACTCTTCGGC  | Direct              |
| YP_247304              | 1                | Lice-GV00079_F<br>Lice-GV00079_R | GCCATTGCTTACTACTTGGTCC<br>GATGCCCTCCATGAGAAGCA | Direct              |
| RR                     | 1                | Lice-GV00086_F<br>Lice-GV00086_R | GCATCTGTCCTTCCTGACCC<br>TTAGAAGCGGTGGAAAGCGT   | Cloning             |
| YP_247455              | 1                | Lice-GV00091_F<br>Lice-GV00091_R | AGTAGAGTACAGGCAGGCGA<br>ACATGAGCACCAAAAACGCC   | Cloning             |

<sup>1</sup> Protein accession number (NCBI) for *R. felis* str. URRWXCa12. CDS flanking SNPs are underlined. Protein names and other information is provided in **supplementary table S4**. RR, repeat region (position 1446564).

<sup>2</sup> Number of SNPs within each region targeted by primers.

<sup>3</sup> 5' to 3' orientation.

<sup>4</sup> Direct sequencing of PCR amplicons, or sequencing after cloning into vectors (see text for further details).

**Supplementary table S2.** Rickettsiaceae genomes utilized for phylogenomics analysis.

| Taxon <sup>1</sup>                                              | ID <sup>2</sup> | No <sup>3</sup> . | %GC   | L (bases) | CDS <sup>4</sup> | PI. <sup>5</sup> |
|-----------------------------------------------------------------|-----------------|-------------------|-------|-----------|------------------|------------------|
| <b>Scrub Typhus Group</b>                                       |                 |                   |       |           |                  |                  |
| * Rickettsiaceae bacterium Os18<br>[NZ_CANJ000000000]           | 148284          | 301               | 29.05 | 1469247   | 1310             | 0                |
| <i>Orientia tsutsugamushi</i> Ikeda<br>[NC_009488]              | 129072          | 1                 | 30.51 | 2008987   | 2197             | 0                |
| <i>Orientia tsutsugamushi</i> Boryong<br>[NC_010793]            | 83812           | 1                 | 30.53 | 2127051   | 2364             | 0                |
| <b>Ancestral Group</b>                                          |                 |                   |       |           |                  |                  |
| * <i>Rickettsia</i> sp. MEAM1 ( <i>Bemisia tabaci</i> )<br>[NA] | 241202          | 607               | 32.13 | 1105415   | 1036             | 0                |
| <i>Rickettsia bellii</i> RML369-C<br>[NC_007940]                | 102610          | 1                 | 31.65 | 1522076   | 1612             | 0                |
| <i>Rickettsia bellii</i> OSU 85-389<br>[NC_009883]              | 35792           | 1                 | 31.63 | 1528980   | 1657             | 0                |
| <i>Rickettsia canadensis</i> CA410<br>[NC_009879]               | 238964          | 1                 | 31.01 | 1150228   | 1130             | 0                |
| <i>Rickettsia canadensis</i> McKiel<br>[NC_016929]              | 89738           | 1                 | 31.05 | 1159772   | 1230             | 0                |
| <b><i>Incertae sedis</i></b>                                    |                 |                   |       |           |                  |                  |
| <i>Rickettsia helvetica</i> C9P9<br>[NZ_CM001467, NZ_CM001468]  | 217856          | 1                 | 32.20 | 1369827   | 1739             | 1                |
| <b>Transitional Group</b>                                       |                 |                   |       |           |                  |                  |
| <i>Rickettsia felis</i> URRWXCal2<br>[NC_007109, NC_007110]     | 64634           | 1                 | 32.40 | 1485148   | 1810             | 1                |
| * <i>Rickettsia felis</i> LSU<br>[NA]                           | (new here)      | 21                | 32.35 | 1483097   | 2194             | 1                |
| * <i>Rickettsia felis</i> LSU-Lb<br>[NA]                        | (new here)      | 35                | 32.45 | 1467654   | 1831             | 2                |
| <i>Rickettsia akari</i> Hartford<br>[NC_009881]                 | 50705           | 1                 | 32.33 | 1231060   | 1437             | 0                |
| <i>Rickettsia australis</i> Cutlack<br>[NC_017058]              | 231019          | 1                 | 32.25 | 1296670   | 1565             | 1                |
| * <i>Rickettsia australis</i> Phillips<br>[NA]                  | AKVZ01          | 45                | 32.21 | 1274508   | 1525             | 2?               |

Genomic variability in *Rickettsia felis* strains; SUPPLEMENTARY MATERIAL

| Taxon <sup>1</sup>                                                                                     | ID <sup>2</sup> | No <sup>3</sup> | %GC   | L (bases) | CDS <sup>4</sup> | PI. <sup>5</sup> |
|--------------------------------------------------------------------------------------------------------|-----------------|-----------------|-------|-----------|------------------|------------------|
| <b>Typhus Group</b>                                                                                    |                 |                 |       |           |                  |                  |
| <i>Rickettsia typhi</i> TH1527<br>[NC_006142]                                                          | 188083          | 1               | 28.92 | 1112372   | 875              | 0                |
| <i>Rickettsia typhi</i> B9991CWPP<br>[NC_017062]                                                       | 187203          | 1               | 28.92 | 1112957   | 877              | 0                |
| <i>Rickettsia typhi</i> Wilmington<br>[NC_017066]                                                      | 34752           | 1               | 28.92 | 1111496   | 892              | 0                |
| <i>Rickettsia prowazekii</i> GvV257<br>[NC_017048]                                                     | 231244          | 1               | 28.99 | 1111969   | 902              | 0                |
| <i>Rickettsia prowazekii</i> RpGvF24<br>[NC_017057]                                                    | 237744          | 1               | 28.99 | 1112101   | 897              | 0                |
| * <i>Rickettsia prowazekii</i> GvF12<br>[NA]                                                           | 264402          | 10              | 29.00 | 1109257   | 966              | 0                |
| <i>Rickettsia prowazekii</i> BuV67-CWPP<br>[NC_017056]                                                 | 229008          | 1               | 29.00 | 1111445   | 901              | 0                |
| <i>Rickettsia prowazekii</i> Katsinyian<br>[NC_017050]                                                 | 230392          | 1               | 29.00 | 1111454   | 902              | 0                |
| * <i>Rickettsia prowazekii</i> NMRC Madrid E<br>[NC_020992]                                            | 275611          | 1               | 29.00 | 1111520   | 926              | 0                |
| <i>Rickettsia prowazekii</i> Madrid E<br>[NC_000963]                                                   | 72556           | 1               | 29.00 | 1111523   | 924              | 0                |
| <i>Rickettsia prowazekii</i> Rp22<br>[NC_017560]                                                       | 89493           | 1               | 29.00 | 1111612   | 910              | 0                |
| * <i>Rickettsia prowazekii</i> Cairo 3<br>[NA]                                                         | 275463          | 20              | 29.07 | 1113960   | 900              | 0                |
| <i>Rickettsia prowazekii</i> Chernikova<br>[NC_017049]                                                 | 240232          | 1               | 29.01 | 1109804   | 892              | 0                |
| <i>Rickettsia prowazekii</i> Dachau<br>[NC_017051]                                                     | 238803          | 1               | 29.01 | 1108946   | 907              | 0                |
| * <i>Rickettsia prowazekii</i> Breinl<br>[NC_020993]                                                   | 269054          | 1               | 29.01 | 1109301   | 914              | 0                |
| <b>Spotted Fever Group</b>                                                                             |                 |                 |       |           |                  |                  |
| <i>Rickettsia</i> endosymbiont of <i>Ixodes scapularis</i><br>[CM000770, CM000771-3]                   | 40569           | 16              | 32.39 | 1776032   | 2404             | 4                |
| * <i>Rickettsia monacensis</i> IrR/Munich<br>[NA]                                                      | 274770          | 88              | 32.39 | 1268385   | 1684             | 1                |
| “ <i>Candidatus Rickettsia amblyommii</i> ” GAT-30V<br>[NC_017028, NC_017020, NC_017029,<br>NC_017021] | 232978          | 1               | 32.43 | 1407796   | 1846             | 3                |

Genomic variability in *Rickettsia felis* strains; SUPPLEMENTARY MATERIAL

| Taxon <sup>1</sup>                                             | ID <sup>2</sup> | No <sup>3</sup> . | %GC   | L (bases) | CDS <sup>4</sup> | PI. <sup>5</sup> |
|----------------------------------------------------------------|-----------------|-------------------|-------|-----------|------------------|------------------|
| <i>Rickettsia rhipicephali</i> 3-7-female6-CWPP<br>[NC_017042] | 233851          | 1                 | 32.41 | 1290368   | 1621             | 1                |
| <i>Rickettsia massiliae</i> AZT80<br>[NC_016931, NC_016939]    | 238520          | 1                 | 32.54 | 1263659   | 1601             | 1                |
| <i>Rickettsia massiliae</i> MTU5<br>[NC_009900, NC_009897]     | 83254           | 1                 | 32.61 | 1360898   | 1721             | 1                |
| <i>Rickettsia montanensis</i> OSU 85-930<br>[NC_017043]        | 232555          | 1                 | 32.57 | 1279798   | 1513             | 0                |
| * " <i>Candidatus Rickettsia gravesii</i> " BWI-1<br>[NA]      | 302479          | 28                | 32.24 | 1327625   | 1687             | 0                |
| <i>Rickettsia japonica</i> YH<br>[NC_016050]                   | 83739           | 1                 | 32.35 | 1283087   | 1575             | 0                |
| <i>Rickettsia heilongjiangensis</i> 054<br>[NC_015866]         | 193551          | 1                 | 32.32 | 1278468   | 1562             | 0                |
| * <i>Rickettsia honei</i> RB<br>[NA]                           | 229666          | 11                | 32.42 | 1268758   | 1614             | 0                |
| <i>Rickettsia peacockii</i> Rustic<br>[NC_012730, NC_012732]   | 48268           | 1                 | 32.56 | 1288492   | 1558             | 1                |
| <i>Rickettsia philipii</i> 364D<br>[NC_016930]                 | 124131          | 1                 | 32.47 | 1287740   | 1570             | 0                |
| <i>Rickettsia rickettsii</i> Hlp#2<br>[NC_016915]              | 236174          | 1                 | 32.47 | 1270751   | 1574             | 0                |
| <i>Rickettsia rickettsii</i> Colombia<br>[NC_016908]           | 228121          | 1                 | 32.46 | 1270083   | 1560             | 0                |
| <i>Rickettsia rickettsii</i> Brazil<br>[NC_016913]             | 239281          | 1                 | 32.45 | 1255681   | 1547             | 0                |
| <i>Rickettsia rickettsii</i> 'Sheila Smith'<br>[NC_009882]     | 5337            | 1                 | 32.47 | 1257710   | 1577             | 0                |
| <i>Rickettsia rickettsii</i> Arizona<br>[NC_016909]            | 236594          | 1                 | 32.44 | 1267197   | 1580             | 0                |
| <i>Rickettsia rickettsii</i> Hauke<br>[NC_016911]              | 233768          | 1                 | 32.45 | 1269721   | 1570             | 0                |
| <i>Rickettsia rickettsii</i> Iowa<br>[NC_010263]               | 59104           | 1                 | 32.45 | 1268175   | 1595             | 0                |
| <i>Rickettsia rickettsii</i> Hino<br>[NC_016914]               | 235723          | 1                 | 32.45 | 1269837   | 1593             | ?                |
| <i>Rickettsia slovacica</i> D-CWPP<br>[NC_017065]              | 233215          | 1                 | 32.50 | 1275720   | 1598             | 0                |
| <i>Rickettsia slovacica</i> 13-B<br>[NC_016639]                | 180092          | 1                 | 32.50 | 1275089   | 1611             | 0                |

Genomic variability in *Rickettsia felis* strains; SUPPLEMENTARY MATERIAL

| Taxon <sup>1</sup>                                                      | ID <sup>2</sup> | No <sup>3</sup> | %GC   | L (bases) | CDS <sup>4</sup> | PI. <sup>5</sup> |
|-------------------------------------------------------------------------|-----------------|-----------------|-------|-----------|------------------|------------------|
| <i>Rickettsia parkeri</i> Portsmouth<br>[NC_017044]                     | 233447          | 1               | 32.43 | 1300386   | 1604             | 0                |
| <i>Rickettsia africae</i> ESF-5<br>[NC_012633, NC_012634]               | 6986            | 1               | 32.40 | 1278530   | 1545             | 1                |
| <i>Rickettsia sibirica</i> 246<br>[NZ_AABW01000001]                     | 27963           | 1               | 32.47 | 1250020   | 1554             | 0                |
| <i>Rickettsia sibirica</i> subsp. <i>sibirica</i> BJ-90<br>[NA]         | 238733          | 8               | 32.45 | 1254734   | 1588             | 0                |
| <i>Rickettsia sibirica</i> subsp. <i>mongolitimonae</i> HA-91<br>[NA]   | 225156          | 21              | 32.42 | 1252337   | 1616             | 0                |
| <i>Rickettsia conorii</i> Malish 7<br>[NC_003103]                       | 45613           | 1               | 32.44 | 1268755   | 1578             | 0                |
| <i>Rickettsia conorii</i> subsp. <i>indica</i> ITTR<br>[NA]             | 229600          | 10              | 32.44 | 1249482   | 1601             | 0                |
| * <i>Rickettsia conorii</i> subsp. <i>israelensis</i> ISTT CDC1<br>[NA] | 230737          | 33              | 32.49 | 1252815   | 1640             | 0                |
| * <i>Rickettsia conorii</i> subsp. <i>caspia</i> A-167<br>[NA]          | 297             | 25              | 32.50 | 1260331   | 1657             | 0                |

<sup>1</sup> Taxa are listed from the **top to the bottom** as shown in the tree (**fig. 1a**). Classification follows previous studies ([Driscoll, et al. 2013](#); [Gillespie, et al. 2007](#); [Gillespie, et al. 2012](#)). The term “*Candidatus*” is used as originally suggested ([Murray and Stackebrandt 1995](#)). *Incertae sedis*, “of uncertain placement”, refers to taxa with unknown or undefined broader relationships. Asterisks denote genomes added since our last study ([Driscoll, et al. 2013](#)). Information pertaining to the genome sequences for *R. felis* strains LSU and LSU-Lb is provided in **Table 2**. Available GenBank accession numbers are listed under each taxon.

<sup>2</sup> PATRIC ([Gillespie, et al. 2011](#); [Wattam, et al. 2014](#)) genome IDs. WGS project ID is provided for *Rickettsia australis* Phillips (this genome was not released on PATRIC as of 08/17/14).

<sup>3</sup> Total number of contigs.

<sup>4</sup> Total number of CDS predicted and annotated using RAST ([Aziz, et al. 2008](#)). For *R. felis* genomes, fgenesb ([Tyson, et al. 2004](#)) was also utilized to predict CDS: str. URRWXCal2 (1499), str. LSU (1859) and str. LSU-Lb (1576).

<sup>5</sup> Number of unique plasmids. We did not analyze plasmid sequences for *Rickettsia australis* Phillips, though this genome purportedly carries two plasmids ([Dong, et al. 2012](#)). The plasmid sequence released for *R. rickettsii* str. Hino was determined to be a contamination of likely Vero cell DNA.

## Literature Cited

Aziz RK, et al. 2008. The RAST Server: rapid annotations using subsystems technology. BMC Genomics 9: 75. doi: 1471-2164-9-75 [pii]  
10.1186/1471-2164-9-75

Dong X, El Karkouri K, Robert C, Raoult D, Fournier PE 2012. Genome sequence of *Rickettsia australis*, the agent of Queensland tick typhus. Journal of bacteriology 194: 5129. doi: 10.1128/JB.01117-12

## Genomic variability in *Rickettsia felis* strains; SUPPLEMENTARY MATERIAL

Driscoll T, Gillespie JJ, Nordberg EK, Azad AF, Sobral BW 2013. Bacterial DNA sifted from the *Trichoplax adhaerens* (Animalia: Placozoa) genome project reveals a putative rickettsial endosymbiont. *Genome Biol Evol* 5: 621-645. doi: 10.1093/gbe/evt036  
evt036 [pii]

Gillespie JJ, et al. 2007. Plasmids and rickettsial evolution: insight from *Rickettsia felis*. *PLoS One* 2: e266. doi: 10.1371/journal.pone.0000266

Gillespie JJ, Nordberg EK, Azad AF, Sobral BW. 2012. Phylogeny and Comparative Genomics: The Shifting Landscape in the Genomics Era. In: Azad AF, Palmer GH, editors. *Intracellular Pathogens II: Rickettsiales*. Boston: American Society of Microbiology. p. 84-141.

Gillespie JJ, et al. 2011. PATRIC: the comprehensive bacterial bioinformatics resource with a focus on human pathogenic species. *Infect Immun* 79: 4286-4298. doi: 10.1128/IAI.00207-11  
IAI.00207-11 [pii]

Murray RG, Stackebrandt E 1995. Taxonomic note: implementation of the provisional status Candidatus for incompletely described procaryotes. *Int J Syst Bacteriol* 45: 186-187.

Tyson GW, et al. 2004. Community structure and metabolism through reconstruction of microbial genomes from the environment. *Nature* 428: 37-43. doi: 10.1038/nature02340  
nature02340 [pii]

Wattam AR, et al. 2014. PATRIC, the bacterial bioinformatics database and analysis resource. *Nucleic Acids Res* 42: D581-591. doi: 10.1093/nar/gkt1099  
gkt1099 [pii]

**Supplementary table S3.** Twenty *Rickettsia* plasmids utilized for comparative analyses.

| Plasmid <sup>1</sup> | Taxon <sup>2</sup>                                          | Classification <sup>3</sup> | ID <sup>4</sup> |
|----------------------|-------------------------------------------------------------|-----------------------------|-----------------|
| pREIS3               | <i>Rickettsia</i> endosymbiont ( <i>Ixodes scapularis</i> ) | SFG                         | CM000773        |
| pRM                  | <i>Rickettsia monacensis</i> IrR-Munich                     | SFG                         | NC_010927       |
| pRAF                 | <i>Rickettsia africae</i> ESF-5                             | SFG                         | NC_012634       |
| pREIS1               | <i>Rickettsia</i> endosymbiont ( <i>Ixodes scapularis</i> ) | SFG                         | CM000771        |
| pRPR                 | <i>Rickettsia peacockii</i> Rustic                          | SFG                         | NC_012732       |
| pLbaR                | <i>Rickettsia felis</i> LSU-Lb                              | TRG                         | (new here)      |
| pREIS2               | <i>Rickettsia</i> endosymbiont ( <i>Ixodes scapularis</i> ) | SFG                         | CM000772        |
| pREIS4               | <i>Rickettsia</i> endosymbiont ( <i>Ixodes scapularis</i> ) | SFG                         | CM000770        |
| pRF                  | <i>Rickettsia felis</i> URRWXCal2                           | TRG                         | NC_007110       |
| pRF                  | <i>Rickettsia felis</i> LSU                                 | TRG                         | (new here)      |
| pRF                  | <i>Rickettsia felis</i> "AUS-Lb"                            | TRG                         | GQ329881        |
| pRF                  | <i>Rickettsia felis</i> LSU-Lb                              | TRG                         | (new here)      |
| pMCE_3               | " <i>Candidatus</i> <i>Rickettsia amblyommii</i> " GAT-30V  | SFG                         | NC_017021       |
| pMC5_1               | <i>Rickettsia australis</i> Cutlack                         | TRG                         | NC_017041       |
| pRhe                 | <i>Rickettsia helvetica</i> C9P9                            | <i>Incertae sedis</i>       | AICO01000000    |
| pMCE_1               | " <i>Candidatus</i> <i>Rickettsia amblyommii</i> " GAT-30V  | SFG                         | NC_017020       |
| pMCE_2               | " <i>Candidatus</i> <i>Rickettsia amblyommii</i> " GAT-30V  | SFG                         | NC_017029       |
| pMCC_1               | <i>Rickettsia rhipicephali</i> 3-7-female6-CWPP             | SFG                         | NC_017055       |
| pRMB                 | <i>Rickettsia massiliae</i> AZT80                           | SFG                         | NC_016939       |
| pRMA                 | <i>Rickettsia massiliae</i> MTU5                            | SFG                         | NC_009897       |

<sup>1</sup> Taxa are listed from the **top to the bottom** as shown in the tree (**fig. 2**). Asterisks denote genomes added since our last study (Driscoll, et al. 2013). Information pertaining to the genome sequences for *R. felis* strains LSU and LSU-Lb is provided in **Table 2**.

<sup>2</sup> The term "*Candidatus*" is used as originally suggested (Murray and Stackebrandt 1995).

<sup>3</sup> Classification follows previous studies (Driscoll, et al. 2013; Gillespie, et al. 2007; Gillespie, et al. 2012). *Incertae sedis*, "of uncertain placement", refers to taxa with unknown or undefined broader relationships.

<sup>4</sup> NCBI accession numbers.

## Literature Cited

Driscoll T, Gillespie JJ, Nordberg EK, Azad AF, Sobral BW 2013. Bacterial DNA sifted from the *Trichoplax adhaerens* (Animalia: Placozoa) genome project reveals a putative rickettsial endosymbiont. *Genome Biol Evol* 5: 621-645. doi: 10.1093/gbe/evt036  
 evt036 [pii]



## Genomic variability in *Rickettsia felis* strains; SUPPLEMENTARY MATERIAL

Gillespie JJ, et al. 2007. Plasmids and rickettsial evolution: insight from *Rickettsia felis*. PLoS One 2: e266. doi: 10.1371/journal.pone.0000266

Gillespie JJ, Nordberg EK, Azad AF, Sobral BW. 2012. Phylogeny and Comparative Genomics: The Shifting Landscape in the Genomics Era. In: Azad AF, Palmer GH, editors. Intracellular Pathogens II: Rickettsiales. Boston: American Society of Microbiology. p. 84-141.

Murray RG, Stackebrandt E 1995. Taxonomic note: implementation of the provisional status Candidatus for incompletely described procaryotes. Int J Syst Bacteriol 45: 186-187.
